# Supplementary material for: Study protocol for the POPART study—Prophylactic Oropharyngeal surfactant for Preterm infants: A Randomised Trial
Source: PubMed Central journal article supplement — BMJ Open. 2020 Jul 20;10(7):e035994. doi: 10.1136/bmjopen-2019-035994 (PMC7375508; doi:10.1136/bmjopen-2019-035994), 2020-07-20
Supplement: bmjopen-2019-035994.draft_revisions.pdf [file bmjopen-2019-035994.draft_revisions.pdf]

# BMJ Open

BMJ Open is committed to open peer review. As part of this commitment we make the peer review history of every article we publish publicly available.

When an article is published we post the peer reviewers' comments and the authors' responses online. We also post the versions of the paper that were used during peer review. These are the versions that the peer review comments apply to.

The versions of the paper that follow are the versions that were submitted during the peer review process. They are not the versions of record or the final published versions. They should not be cited or distributed as the published version of this manuscript.

BMJ Open is an open access journal and the full, final, typeset and author-corrected version of record of the manuscript is available on our site with no access controls, subscription charges or pay-per-view fees (<http://bmjopen.bmj.com>).

If you have any questions on BMJ Open's open peer review process please email [info.bmjopen@bmj.com](mailto:info.bmjopen@bmj.com)

# BMJ Open

## Study protocol for the POPART study – Prophylactic Oropharyngeal surfactant for Preterm infants: A Randomised Trial

|                               |                                                                                                                                                                                                                                                                                                                                                                                                                                                                                                                                                                                                                                                                                                                                   |
|-------------------------------|-----------------------------------------------------------------------------------------------------------------------------------------------------------------------------------------------------------------------------------------------------------------------------------------------------------------------------------------------------------------------------------------------------------------------------------------------------------------------------------------------------------------------------------------------------------------------------------------------------------------------------------------------------------------------------------------------------------------------------------|
| Journal:                      | <i>BMJ Open</i>                                                                                                                                                                                                                                                                                                                                                                                                                                                                                                                                                                                                                                                                                                                   |
| Manuscript ID                 | bmjopen-2019-035994                                                                                                                                                                                                                                                                                                                                                                                                                                                                                                                                                                                                                                                                                                               |
| Article Type:                 | Protocol                                                                                                                                                                                                                                                                                                                                                                                                                                                                                                                                                                                                                                                                                                                          |
| Date Submitted by the Author: | 25-Nov-2019                                                                                                                                                                                                                                                                                                                                                                                                                                                                                                                                                                                                                                                                                                                       |
| Complete List of Authors:     | <p>murphy, madeleine; National Maternity Hospital, Neonatology; National Children's Research Centre, National Children's Research Centre, Our Lady's Children's Hospital</p> <p>Galligan, Marie; University College Dublin School of Medicine and Medical Science, School of Medicine</p> <p>Molloy, Brenda; University College Dublin School of Medicine and Medical Science, School of Medicine</p> <p>Hussain, Rabia; University College Dublin School of Medicine and Medical Science, School of Medicine</p> <p>Doran, Peter; University College Dublin School of Medicine and Medical Science, School of Medicine</p> <p>ODonnell, Colm; The National Maternity Hospital, Dublin, Ireland, Neonatal Intensive Care Unit</p> |
| Keywords:                     | NEONATOLOGY, PAEDIATRICS, PERINATOLOGY                                                                                                                                                                                                                                                                                                                                                                                                                                                                                                                                                                                                                                                                                            |
|                               |                                                                                                                                                                                                                                                                                                                                                                                                                                                                                                                                                                                                                                                                                                                                   |

SCHOLARONE™  
Manuscripts

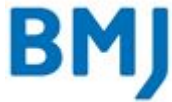

I, the Submitting Author has the right to grant and does grant on behalf of all authors of the Work (as defined in the below author licence), an exclusive licence and/or a non-exclusive licence for contributions from authors who are: i) UK Crown employees; ii) where BMJ has agreed a CC-BY licence shall apply, and/or iii) in accordance with the terms applicable for US Federal Government officers or employees acting as part of their official duties; on a worldwide, perpetual, irrevocable, royalty-free basis to BMJ Publishing Group Ltd ("BMJ") its licensees and where the relevant Journal is co-owned by BMJ to the co-owners of the Journal, to publish the Work in this journal and any other BMJ products and to exploit all rights, as set out in our [licence](#).

The Submitting Author accepts and understands that any supply made under these terms is made by BMJ to the Submitting Author unless you are acting as an employee on behalf of your employer or a postgraduate student of an affiliated institution which is paying any applicable article publishing charge ("APC") for Open Access articles. Where the Submitting Author wishes to make the Work available on an Open Access basis (and intends to pay the relevant APC), the terms of reuse of such Open Access shall be governed by a Creative Commons licence – details of these licences and which [Creative Commons](#) licence will apply to this Work are set out in our licence referred to above.

Other than as permitted in any relevant BMJ Author's Self Archiving Policies, I confirm this Work has not been accepted for publication elsewhere, is not being considered for publication elsewhere and does not duplicate material already published. I confirm all authors consent to publication of this Work and authorise the granting of this licence.

# Study protocol for the POPART study – Prophylactic Oropharyngeal surfactant for Preterm infants:

## A Randomised Trial

Madeleine C. Murphy,<sup>1-3</sup> Marie Galligan,<sup>3</sup> Brenda Molloy,<sup>3</sup> Rabia Hussain,<sup>3</sup> Peter Doran,<sup>3</sup> Colm P.F.

O'Donnell<sup>1-3</sup>

1. National Maternity Hospital, Dublin, Ireland
2. National Children's Research Centre, Dublin, Ireland
3. School of Medicine, University College Dublin, Ireland

Word count 3972

Abstract 299

Figures/Tables 4

References 45

## Trial registration

Protocol identification (code or reference number): UCDCRC/16/003

EudraCT number: 2016-004198-41

Protocol version 2.0, dated 19.07.19

## Trial sponsor

University College Dublin

## Corresponding Author

Address Prof. Colm O'Donnell, Department of Neonatology, National Maternity Hospital,  
Holles Street, Dublin 2, Ireland

Tel +353 1 6373100

Email [codonnell@nmh.ie](mailto:codonnell@nmh.ie)

**Key words:** Infant, newborn; oropharyngeal surfactant; respiratory distress syndrome; intubation;  
randomised controlled trial

1  
2  
3 **Author Contributions:** COD conceived and designed the trial protocol, co-wrote the first draft and  
4 revised the manuscript for intellectual content. MCM helped design the trial protocol, co-wrote the  
5 first draft and revised the manuscript for intellectual content. MG, BM, RH, and PD helped design  
6 the trial protocol and revised the manuscript for intellectual content. MG designed the statistical  
7 analysis plan. All authors approved the final manuscript prior to submission.  
8  
9  
10  
11  
12  
13  
14  
15  
16

17 **Funding:**

18 Chiesi Farmaceutici, manufacturers of poractant alpha (Curosurf), supply the study drug free of  
19 charge; they had no role in study design; have no role in study conduct; and will have no role in data  
20 collection, analysis or interpretation. Further, they will have no role in the decision to present,  
21 publish or otherwise report results.  
22  
23  
24  
25  
26

27 Madeleine Murphy is the recipient of a Clinical Research Fellowship by the National Children's  
28 Research Centre, Dublin (R17637)

29  
30  
31  
32 Pediatric Clinical Research Infrastructure Network (PedCRIN), a Project of the European Union  
33 Horizon 2020 programme designed to support the extension of clinical drug trials in children  
34 throughout Europe, also support the study.  
35  
36  
37  
38  
39  
40

41 **Competing interests:** Chiesi Farmaceutici, manufacturers of poractant alpha (Curosurf), supply the  
42 study drug free of charge; they had no role in study design; have no role in study conduct; and will  
43 have no role in data collection, analysis or interpretation. Further, they will have no role in the  
44 decision to present, publish or otherwise report results.  
45  
46  
47  
48  
49  
50  
51

52 **Ethics approval:** Research Ethics Committee, The National Maternity Hospital, Dublin, Ireland  
53  
54  
55  
56  
57  
58  
59  
60

1  
2  
3 **Acknowledgements:** We would like to acknowledge the administrative staff at UCD for their advice,  
4  
5 and support with the trial thus far. We wish to thank the members of PedCRIN and the Principal  
6  
7 Investigators and members of the Clinical Trials Units at all our European sites for facilitating  
8  
9 extension of our trial to Europe. POPART Trial Investigators: Jan Miletin, Coombe Women and  
10  
11 Infants University Hospital, Dublin, Ireland; Claus Klingenberg, University Northern Norway, Tromsø,  
12  
13 Norway; Hans Jørgen Guthe, Haukeland University Hospital, Bergen, Norway; Richard Plavka, Charles  
14  
15 University, Prague, Czech Republic; Tomas Juren, University Hospital Brno, Brno, Czech Republic;  
16  
17 Vincent Rigo, Le Centre Hospitalier Universitaire, Liege, Belgium; Kajsa Bohlin, Karolinska Institutet,  
18  
19 Stockholm, Sweden; and Almerinda Pereira, Hospital de Braga, Braga, Portugal.  
20  
21  
22  
23  
24  
25  
26  
27  
28  
29  
30  
31  
32  
33  
34  
35  
36  
37  
38  
39  
40  
41  
42  
43  
44  
45  
46  
47  
48  
49  
50  
51  
52  
53  
54  
55  
56  
57  
58  
59  
60

**Data statement:** Members of the Trial Steering Committee will have access to the final dataset. Data  
will be available on request.

## Abstract

Introduction: Many preterm infants develop respiratory distress syndrome (RDS), a condition characterised by a relative lack of surfactant. Endotracheal surfactant therapy revolutionised the care of preterm infants in the 1990s. However, supporting newborns with RDS with continuous positive airway pressure (CPAP) and reserving endotracheal surfactant for those who develop respiratory failure despite CPAP yields better results than intubating all infants for surfactant. Half of preterm infants initially managed with CPAP are intubated for surfactant. Intubation is difficult to learn and associated with adverse effects. Surfactant administration into the oropharynx has been reported in preterm animals and humans and may be effective. We wished to determine whether giving oropharyngeal surfactant at birth reduces the rate of endotracheal intubation for respiratory failure in preterm infants within 120 hours of birth.

Methods and analysis: POPART (Prophylactic Oropharyngeal surfactant for Preterm infants: A Randomised Trial) is an investigator-led, unblinded, multicentre, randomised, parallel group, controlled trial. Infants are eligible if born at a participating centre before 29 weeks gestational age and there is a plan to offer intensive care. Infants are excluded if they have major congenital anomalies. Infants are randomised to treatment with oropharyngeal surfactant in addition to CPAP or CPAP alone at birth. The primary outcome is intubation within 120 hours of birth, for bradycardia and/or apnoea despite respiratory support in the delivery room or respiratory failure in the intensive care unit. Secondary outcomes include incidence of mechanical ventilation, endotracheal surfactant use, chronic lung disease, and death before hospital discharge.

Ethics and dissemination: Approval for the study has been granted by the Research Ethics Committees at the National Maternity Hospital, Dublin, Ireland (EC31.2016), and at each

1  
2  
3 participating site. The trial is being conducted at 9 centres in 6 European countries. The study results  
4  
5 will be submitted for publication in a peer-reviewed journal.  
6  
7  
8  
9  
10  
11  
12  
13  
14  
15  
16  
17  
18  
19  
20  
21  
22  
23  
24  
25  
26  
27  
28  
29  
30  
31  
32  
33  
34  
35  
36  
37  
38  
39  
40  
41  
42  
43  
44  
45  
46  
47  
48  
49  
50  
51  
52  
53  
54  
55  
56  
57  
58  
59  
60

For peer review only



1  
2  
3 Article summary  
4  
5  
6

7 Strengths and limitations of this study  
8  
9  
10

- 11
- 12 • This is the first randomised study to examine the efficacy of giving oropharyngeal surfactant  
13 at birth to preterm infants at high risk of developing respiratory distress syndrome.  
14
  - 15 • Oropharyngeal administration is less invasive and easier to perform than endotracheal  
16 administration and avoids the short- and longer-term adverse effects of intubation.  
17
  - 18 • The study will determine whether prophylactic oropharyngeal surfactant reduces the rate of  
19 endotracheal intubation for respiratory failure within 120 hours of birth among infants born  
20 before 29 weeks of gestation.  
21
  - 22 • The multicentre nature of this study will increase the generalisability of its findings.  
23
  - 24 • We were unable to credibly mask the intervention.  
25  
26  
27  
28  
29  
30  
31  
32  
33  
34  
35  
36  
37  
38  
39  
40  
41  
42  
43  
44  
45  
46  
47  
48  
49  
50  
51  
52  
53  
54  
55  
56  
57  
58  
59  
60

## Background

All newly-born infants have fluid-filled lungs. Within a short time after birth, they must stop producing this liquid, clear it from their lungs, and replace it with air. Respiratory distress syndrome (RDS) is a lung condition characterised by difficulty in recruiting and maintaining an adequate volume of gas in the lungs. It manifests with increasing signs of respiratory distress and evidence of respiratory failure in newborns at or shortly after birth. The risk of RDS is inversely related to gestational age (GA). Infants with RDS have structural and functional immaturity of their lungs. They also have a relative lack of surfactant,<sup>1</sup> an endogenously produced substance that enables alveoli to expand more easily to recruit and maintain gas within the lung.

Exogenous surfactant<sup>2,3</sup> is frequently used to treat newborns with RDS and has led to improved outcomes for infants worldwide. Randomised controlled trials (RCTs) in the 1980s – 1990s<sup>4-7</sup> demonstrated that surfactant, given by endotracheal tube (ETT), reduced mortality and air leak among premature infants who were intubated for respiratory failure due to RDS. This led to the widespread practice of intubating all extremely preterm infants for surfactant and ventilation (“prophylactic surfactant”).<sup>5</sup> Prior to the introduction of surfactant into clinical practice, concerns were raised that premature infants who were intubated for respiratory support had worse respiratory outcomes than infants who were managed with the non-invasive respiratory support, nasal continuous positive airway pressure (CPAP).<sup>8</sup> These concerns persisted after the widespread introduction of surfactant.<sup>9</sup> Multicentre RCTs found that starting infants on CPAP may be beneficial when compared with intubation and positive pressure ventilation (PPV); the studies reported decreased duration of mechanical ventilation with potential benefits of reduction of death and or bronchopulmonary dysplasia (BPD).<sup>10-12</sup> Managing premature newborns initially with CPAP and reserving intubation, mechanical ventilation and surfactant for those infants with worsening respiratory failure despite CPAP yields better results than intubating all infants for surfactant

1  
2  
3 administration.<sup>13</sup> About half of premature infants initially managed with CPAP for RDS are ultimately  
4  
5 intubated for surfactant and ventilation.<sup>14</sup>  
6  
7  
8  
9

10 Intubation is a procedure that is difficult to learn and is associated with adverse effects, both short<sup>15-</sup>  
11  
12 <sup>19</sup> and longer-term.<sup>20-22</sup> This has led many clinicians to investigate alternative methods of surfactant  
13  
14 delivery.<sup>23</sup> Giving nebulised surfactant to spontaneously breathing infants has met with limited  
15  
16 success.<sup>24-27</sup> Progress has been slow due to the technical difficulties encountered in aerosolising such  
17  
18 large molecules, the expense of the equipment needed to do so and the cost of the large amount of  
19  
20 surfactant needed to form an aerosol. Interest has largely focussed on less-invasive methods of  
21  
22 surfactant administration. The “minimally invasive” techniques have involved introducing either a  
23  
24 feeding tube or vascular catheter into the trachea of a spontaneously breathing infant under direct  
25  
26 vision with a laryngoscope.<sup>28-31</sup> These techniques may reduce the need for mechanical ventilation  
27  
28 among preterm infants. However, they appear more difficult than intubation and the many short-  
29  
30 term adverse effects of intubation that are due to laryngoscopy are not avoided. The laryngeal mask  
31  
32 airway, a supraglottic airway device, may be used as an interface to deliver surfactant.<sup>32-35</sup> However  
33  
34 there is currently no device available for use in very low birth weight infants, who constitute the  
35  
36 majority of infants diagnosed with RDS, who constitute the  
37  
38  
39  
40  
41  
42  
43

44 Direct administration of surfactant into the pharynx of human infants has been described in  
45  
46 randomised<sup>7</sup> and prospective cohort studies.<sup>36-37</sup> It is apparently effective and is an easier technique  
47  
48 to perform than endotracheal intubation or passing a feeding tube or vascular catheter into the  
49  
50 trachea. Advantages of pharyngeal surfactant use are that it is an easy and cheaper method of  
51  
52 administering surfactant and likely causes less discomfort to infants as it avoids the use of a  
53  
54 laryngoscope. Giving surfactant early, prior to ventilation, delivers surfactant to a fluid-filled lung,  
55  
56 which is spread via a fluid-air interface when the infant starts breathing. Animal studies report that  
57  
58 surfactant is distributed more uniformly,<sup>38</sup> and lung function and compliance is better<sup>39</sup> if surfactant  
59  
60

1  
2  
3 is delivered prior to ventilation. If shown to be effective, it may reduce the adverse effects, and  
4  
5 additional associated costs, of ventilation.  
6  
7  
8  
9

10 A Cochrane review of pharyngeal surfactant<sup>40</sup> did not identify any eligible trials to assess whether  
11  
12 pharyngeal installation of surfactant before the first breath prevented morbidity and mortality in  
13  
14 infants at risk of RDS. Large well conducted RCTs are needed, due to the evidence from animal<sup>41 42</sup>  
15  
16 and observational human studies<sup>36 37</sup> suggesting that pharyngeal surfactant administration is  
17  
18 potentially safe, feasible, and may be effective.  
19  
20  
21  
22

### 23 Objective

24  
25  
26  
27 We will perform a study to establish whether giving preterm infants surfactant into their oropharynx  
28  
29 at birth in addition to CPAP compared with CPAP alone reduces their need for subsequent intubation  
30  
31 in the first 5 days of life.  
32  
33  
34  
35

### 36 Methods

#### 37 Trial design

38  
39  
40  
41  
42  
43  
44  
45 The POPART trial is an investigator-led, unblinded, multicentre, randomised parallel-group  
46  
47 controlled trial. It aims to determine whether administering oropharyngeal surfactant to premature  
48  
49 infants at birth in addition to CPAP compared to CPAP alone reduces the rate of intubation for  
50  
51 respiratory failure in the first 5 days of life. The trial will recruit 250 infants born <29 weeks GA at  
52  
53 participating centres. A schedule of events is seen in figure 1.  
54  
55  
56  
57  
58

#### 59 Setting

1  
2  
3  
4  
5 The trial is being conducted at 9 neonatal intensive care units (NICUs) in 6 European countries  
6  
7 [Ireland (National Maternity Hospital (NMH), Dublin; Coombe Women and Infants University  
8  
9 Hospital (CWIUH) Dublin); Norway (University Northern Norway, Tromsø; Haukeland University  
10  
11 Hospital, Bergen); Czech Republic (Charles University, Prague; University Hospital Brno, Brno),  
12  
13 Belgium (Le Centre Hospitalier Universitaire (CHU), Liege); Sweden (Karolinska Institutet,  
14  
15 Stockholm); and Portugal (Hospital de Braga, Braga). All data collected pertaining to the primary and  
16  
17 secondary outcomes will be collected as part of the infants' hospital course.  
18  
19  
20  
21  
22

## 23 Participants

### 24 25 26 27 28 Inclusion and exclusion criteria

29  
30  
31  
32 Trial subjects will be premature infants at risk of RDS. Infants born less than 29 weeks GA will be  
33  
34 included if the treating physician plans to offer intensive care. Infants will be excluded if they have  
35  
36 major congenital anomalies (including neural tube defects, major structural cardiac anomalies  
37  
38 (excluding patent ductus arteriosus, ventricular septal defect, atrioventricular septal defect),  
39  
40 abdominal wall defects, congenital diaphragmatic hernia and major dysmorphic features with an  
41  
42 abnormal karyotype) and if the treating physician does not plan to offer intensive care. Written  
43  
44 informed consent from parent/legal guardian(s) will be obtained before delivery. Infants of multiple  
45  
46 gestation and of either sex are eligible to be enrolled.  
47  
48  
49  
50  
51

### 52 Outcome measures

#### 53 54 55 56 57 Primary outcome

1  
2  
3 The primary outcome is the incidence of endotracheal intubation for respiratory failure within 120  
4 hours of birth. Enrolled infants will be intubated for persistent apnoea and/or bradycardia (HR  
5 <100bpm) in the delivery room (DR), or for respiratory failure in the NICU defined as  $\geq 2$  of:  
6  
7

- 8 - Clinical signs – worsening tachypnoea; grunting; subcostal, intercostal and/or sternal recession
- 9
- 10 - Acidosis – pH < 7.2 on 2 blood gases (arterial or capillary)  $\geq 30$  minutes apart
- 11
- 12 - Hypoxaemia –  $\text{FiO}_2 > 0.4$  to keep oxygen saturation ( $\text{SpO}_2$ )  $\geq 90\%$  for > 30 minutes
- 13
- 14 - Hypercarbia –  $\text{PCO}_2 > 9.0$  kPa on 2 blood gases (arterial or capillary)  $\geq 30$  minutes apart
- 15
- 16 - Apnoea – recurrent apnoea treated with mask ventilation
- 17
- 18
- 19
- 20
- 21
- 22

### 23 Secondary outcomes

24  
25  
26  
27 The secondary outcomes are as follows:

- 28 1. Intubation in the DR
  - 29
  - 30 2. Number of attempts taken to successfully intubate in the DR
  - 31
  - 32 3. Chest compressions in the DR
  - 33
  - 34 4. Adrenaline administration in the DR
  - 35
  - 36 5. Rectal temperature on admission to the NICU
  - 37
  - 38 6. NICU intubation
  - 39
  - 40 7. Surfactant use before death or hospital discharge
  - 41
  - 42
  - 43
  - 44
  - 45
  - 46
  - 47
  - 48
  - 49
  - 50
  - 51
  - 52
  - 53
  - 54
  - 55
  - 56
  - 57
  - 58
  - 59
  - 60
- a. Number of doses, including total dose
  - b. Intra-tracheal surfactant received post-intervention
  - c. Doses of post-intervention surfactant
8. Respiratory distress syndrome
  - a. Clinical evidence and radiological evidence of respiratory distress
  9. Incidence of pneumothorax
  - a. Incidence of pneumothorax on chest x-ray

- 1
- 2
- 3 10. Incidence of pulmonary haemorrhage
- 4
- 5 a. Clinical evidence of pulmonary haemorrhage
- 6
- 7 11. Mechanical ventilation
- 8
- 9 12. Days of mechanical ventilation
- 10
- 11 13. Use of postnatal corticosteroids for ventilator dependence
- 12
- 13 14. Days of duration of respiratory support (endotracheal ventilation, high-frequency oscillatory
- 14 ventilation, CPAP, heated humidified high-flow nasal cannula O<sub>2</sub>, low flow nasal cannula O<sub>2</sub>)
- 15
- 16 15. BPD – supplemental O<sub>2</sub> at 28 days of life
- 17
- 18 16. Chronic lung disease of prematurity (CLD) – need for supplemental O<sub>2</sub> at 36 weeks corrected
- 19 GA determined by physiological oxygen reduction test
- 20
- 21 17. Medical treatment for a patent ductus arteriosus (PDA)
- 22
- 23 a. Administration of ibuprofen or paracetamol for PDA
- 24
- 25 18. Surgical treatment for a PDA
- 26
- 27 19. Proven necrotising enterocolitis (≥ Bell's stage 2)
- 28
- 29 20. Incidence of Intraventricular haemorrhage (IVH) (any and severe: IVH grade ≥ 3)
- 30
- 31 a. Evidence on surveillance cranial ultrasounds performed as standard of care
- 32
- 33 21. Incidence of cystic periventricular leukomalacia
- 34
- 35 a. Evidence on surveillance cranial ultrasounds performed as standard of care
- 36
- 37 22. Retinopathy of prematurity treated with laser photocoagulation or intravitreal injections
- 38
- 39 a. Evidence on surveillance ophthalmology review performed as standard of care
- 40
- 41 23. Death before hospital discharge
- 42
- 43 24. Survival without BPD at hospital discharge
- 44
- 45 25. Survival without CLD at hospital discharge
- 46
- 47 26. Duration of hospitalisation
- 48
- 49 27. Use of home oxygen therapy
- 50
- 51 a. Discharged home on oxygen therapy
- 52
- 53
- 54
- 55
- 56
- 57
- 58
- 59
- 60

1  
2  
3  
4  
5 Intervention arm: Oropharyngeal surfactant  
6  
7  
8  
9

10 Infants randomised to oropharyngeal surfactant will receive a dose of surfactant (Curosurf, Chiesi  
11 Farmaceutici, Parma, Italy) immediately after birth, ideally before the cord is clamped e.g. 60  
12 seconds. If it is given after the cord is clamped, it will be given once the infant is placed on the  
13 resuscitaire. It will be given within 5 minutes of birth in all cases.  
14  
15  
16  
17  
18

19  
20  
21 The surfactant will be warmed prior to being drawn up in a sterile syringe as per manufacturer's  
22 recommendation. This will be done by opening the mouth gently and administering the surfactant as  
23 a single bolus into the oropharynx using surfactant tubing attached to the syringe.  
24  
25  
26  
27  
28

29  
30 Infants will not be weighed prior to enrolment. The 50<sup>th</sup> centile for birth weight (BW) for boys and  
31 girls according to GA is shown in table 1. In our study, infants < 26 weeks will receive a full 120mg  
32 vial of Curosurf. We estimate that this will provide dosing in the range as indicated in table 2. In our  
33 study, infants 26 – 28 weeks will receive a full 240mg vial of Curosurf, and we estimate that this will  
34 provide dosing in the range as indicated in table 3.  
35  
36  
37  
38  
39  
40  
41  
42

43 Control group: CPAP  
44  
45  
46  
47

48 Infants randomised to the control group will not have anything injected into their oropharynx and  
49 will be stabilised on CPAP in the DR as per routine practice.  
50  
51  
52  
53

54 Clinical management  
55  
56  
57  
58  
59  
60



1  
2  
3 After the initial intervention, infants will then receive standard care with CPAP, regardless of their  
4 group assignment. DR care will be carried out by the neonatal team who will be trained in neonatal  
5 resuscitation as per the recommendations of the International Liaison Committee on Resuscitation  
6 (ILCOR). Infants in both groups will be intubated in the DR for persistent apnoea and/or bradycardia  
7 despite PPV by mask as per ILCOR recommendations. Infants will not be intubated in the DR solely  
8 for surfactant administration. Further surfactant administration and all other aspects of neonatal  
9 intensive care will be at the discretion of the treating physicians. Infants in both groups will be  
10 treated equally; they will be closely watched to see if they need extra treatment for their RDS at any  
11 stage, including surfactant given endotracheally. The frequency of blood gas monitoring is based on  
12 the decision of the treating physician. Enrolled infants will be intubated if they reach the pre-  
13 determined criteria for respiratory failure. After giving endotracheal surfactant for the treatment of  
14 RDS, attending clinicians may attempt to extubate the babies immediately or they may elect to  
15 ventilate the babies for a longer period at their discretion.

#### Investigational medicinal product

16  
17  
18  
19 Poractant alpha (Curosurf, Chiesi Farmaceutici, Parma, Italy) is a natural surfactant prepared from  
20 porcine lungs. It is licensed for ET use for the prevention and treatment of RDS in preterm infants.  
21 The dosing recommendations for treatment with Curosurf when given by ETT are 200mg/kg for  
22 established RDS and 100 – 200mg/kg for prophylaxis. Further doses of 100mg/kg Curosurf may be  
23 given to infants who have persistent respiratory distress despite treatment with surfactant  
24 (maximum recommended dose 400mg/kg). It is currently not licensed for oropharyngeal  
25 administration, and therefore this study will examine the off-label use of a licensed product. The  
26 timing or dosage of ET surfactant will not be affected by oropharyngeal surfactant. If an infant is felt  
27 to need ET surfactant following initial oropharyngeal administration, then they will receive the  
28 standard initial dose via ETT.

## Randomisation

Infants will be randomised (1:1) to receive oropharyngeal surfactant in addition to CPAP or CPAP alone using variable block randomisation, with block sizes of 4, 6 and 8. Randomisation will be stratified by participating centre and GA (<26 weeks and 26-28<sup>+6</sup> weeks inclusive). Infants of multiple gestations will be randomised as individuals.

A computer-generated randomisation schedule using sequential 6-digit randomisation codes will be prepared by an independent statistician who will not be involved with subsequent data analysis or interpretation and stored securely on a password-protected computer. Each participating centre will be provided with two separate boxes for the two GA strata with consecutively numbered, sealed opaque randomisation envelopes containing the assigned treatment allocation. The boxes containing the envelopes will be stored securely in the NICU. An envelope from the appropriate box will be opened immediately before birth.

## Blinding

This is an open-label study. The study will not be blinded to investigators, subjects, or medical or nursing staff. We are not using a placebo, and in the event of the infant being randomised to the 'CONTROL' arm, then they will be commenced on CPAP immediately after birth. The trial statistician will be blinded for data analysis and will be kept unaware of treatment group assignments. We defined objective criteria for the primary outcome to minimise potential bias.

## Data management

1  
2  
3 Data will be collected by the on-site investigators from the patient's clinical notes. This will be  
4  
5 recorded on a data worksheet and transferred to an electronic Case Report Form (CRF) to be stored  
6  
7 in a secure, dedicated, password-protected electronic database. The clinical study monitor and  
8  
9 representative of the regulatory authority can directly access source documents for comparison of  
10  
11 such data with the data in the electronic CRFs and can verify that the study is carried out in  
12  
13 compliance with the protocol and local regulatory requirements.  
14  
15  
16

17  
18 The investigators will adhere to national and hospital protocols on data use and storage. Data will be  
19  
20 coded. It will be stored in a locked filing cabinet then uploaded onto a password-protected computer  
21  
22 in a locked office. Documents will be stored safely in confidential conditions. On all study-specific  
23  
24 documents other than the signed consent, the subject will be referred to by the study subject  
25  
26 identification code.  
27  
28  
29  
30  
31

### 32 Description of statistical methods 33 34 35 36

37 Trial results will be reported according to the Consolidated Standards of Reporting Trials (CONSORT).  
38  
39 The flow of patients through the trial will be represented on a CONSORT flow diagram, and the  
40  
41 number included in the primary and secondary analyses as well as all reasons for exclusions will be  
42  
43 reported per trial arm. Analysis of efficacy endpoints will be carried-out following the Intention-To-  
44  
45 Treat principle. A Per-Protocol analysis will also be carried out on the primary endpoint, excluding  
46  
47 infants with incomplete data on the primary outcome and infants with any major protocol  
48  
49 deviations.  
50  
51  
52  
53

54 Demographic and baseline data will be summarised by treatment group to evaluate comparability.  
55  
56  
57  
58

### 59 Primary outcome analysis 60

1  
2  
3  
4  
5 The primary outcome will be summarised per group. Ratios of relative risk will be  
6  
7 reported with 95% confidence intervals. A two-sided, two-proportion Z test will be  
8  
9 carried out to investigate whether the rate of endotracheal intubation differs between  
10  
11 intervention and standard-of-care. This analysis will be carried out both on the  
12  
13 intention-to-treat set and on the per protocol set.  
14  
15

16  
17  
18 A competing risks model will be fitted to investigate the effect of the intervention on  
19  
20 the primary endpoint, adjusting for competing outcomes (e.g. mortality) that may  
21  
22 impact on observation of the primary endpoint.  
23  
24  
25

26  
27  
28 The sensitivity of the estimated intervention effect to measured covariates of interest,  
29  
30 including centre, GA, birth weight, gender, mode of delivery and antenatal  
31  
32 corticosteroid treatment, will be evaluated with regression analysis.  
33  
34  
35

### 36 37 Secondary outcome analysis

38  
39 Categorical outcomes will be summarised per treatment group, with between-group differences  
40  
41 expressed as a relative risk with 95% confidence intervals. A two-sided, two-proportion Z test will be  
42  
43 carried out for each categorical outcome to investigate whether the proportion differs between  
44  
45 intervention and standard of care. For the important secondary endpoint of death before hospital  
46  
47 discharge, regression analysis will be employed to determine sensitivity of the estimated  
48  
49 intervention effect to potentially relevant covariates (as specified above for the primary outcome).  
50  
51  
52

53  
54  
55 Numeric secondary outcomes will be summarised by treatment group and between-group  
56  
57 differences will be presented with a 95% confidence interval. A superiority hypothesis test will be  
58  
59  
60

1  
2  
3 carried out to test for a difference in the outcome between control and intervention, using a t-test  
4  
5 or a Mann-Whitney U test where relevant.  
6  
7  
8  
9

#### 10 Subgroup analyses

11  
12 Subgroup analysis of the primary outcome and the important secondary outcome of death before  
13  
14 hospital discharge will be carried out by regression modelling to determine differences in the  
15  
16 intervention effect for infants of different GA strata, and infants from different participating centres.  
17  
18  
19  
20

#### 21 Missing data

22  
23  
24  
25 Any missing data or data anomalies will be communicated to the study site(s) for prompt  
26  
27 clarification and resolution. For outcomes missing more than 5% of data in either treatment group,  
28  
29 missing data methods will be employed in analysis. For categorical outcomes with censored data,  
30  
31 Kaplan-Meier analyses will be used to estimate treatment effect. For other missing data, a suitable  
32  
33 imputation method will be selected during blind review of the data.  
34  
35  
36  
37  
38

#### 39 Sample size and power

40  
41  
42  
43 The sample size calculation assumed a rate of endotracheal intubation of 46% for infants treated  
44  
45 with CPAP alone, and a rate of 28% for infants receiving oropharyngeal surfactant and CPAP. The  
46  
47 former was informed by published RCTs showing a rate of mechanical ventilation in the days after  
48  
49 birth among preterm infants treated with CPAP alone from 40– 60%<sup>10-12</sup> and rates of CPAP failure of  
50  
51 43% reported in a cohort of preterm infants 25 – 28 weeks' gestation initially commenced on  
52  
53 CPAP.<sup>14</sup> The latter was informed by a cohort of infants born 26 – 28 weeks' gestation reporting that  
54  
55 minimally invasive surfactant techniques reduced the rate of mechanical ventilation to from 46% to  
56  
57 28%.<sup>28</sup> Sample size was calculated in G\*power based on a two-sided, two-proportion Z test. A  
58  
59  
60

1  
2  
3 sample size of 125 infants per arm will be required to give a statistical power of 80% at a significance  
4  
5 level of 5%, adjusted for an anticipated death rate of 10% (estimated from local data (NMH,  
6  
7 Neonatal Clinical Report, 2015).  
8  
9

## 10 11 12 Safety analyses 13 14 15

16 Adverse events following administration of oropharyngeal surfactant will be documented. Safety  
17  
18 analyses will be carried out on the Safety Set, defined as patients in the intervention arm who  
19  
20 received oropharyngeal surfactant and patients who received CPAP only. The frequency of adverse  
21  
22 events and the number and percentage of infants reported as having at least one emergent adverse  
23  
24 event, will be reported by system organ class and preferred term, by treatment received. The same  
25  
26 description will be performed for serious adverse events (SAE), severe AE, AE treatment-related and  
27  
28 AE leading to IMP withdrawal. Defined SAEs for the study are important medical events, and death  
29  
30 before hospital discharge.  
31  
32  
33  
34  
35

## 36 37 Safety monitoring and interim analysis 38 39 40

41 A data safety monitoring board (DSMB) will be established to perform ongoing safety surveillance  
42  
43 and to perform interim analyses on the study data. The DSMB will be an independent committee,  
44  
45 composed of a minimum of three members; at least two will be clinicians with expertise in clinical  
46  
47 trials; at least one member will be a clinician with expertise in neonatology.  
48  
49  
50

51  
52 The DSMB will meet on a 6-monthly basis after start of the trial and will review the frequency and  
53  
54 severity of AEs in both treatment groups. If they observe any significant excess of SAEs in the  
55  
56 intervention group associated with the intervention, they may recommend premature termination  
57  
58 of the trial on the basis of safety concerns.  
59  
60

1  
2  
3  
4  
5 The DSMB will conduct interim analysis to determine whether the data provide overwhelming  
6  
7 evidence of efficacy or futility, defined as a highly statistically significant difference in the primary  
8  
9 outcome or a highly statistically significant difference in the important secondary outcome of death  
10  
11 before hospital discharge. The type I error rate for interim analysis will be set to 0.001 in accordance  
12  
13 with the Haybittle-Peto stopping boundary. For final analysis, the type I error rate will remain at  
14  
15 0.05. Interim analysis will be carried out after approximately 50% of participants (n=126) have  
16  
17 completed the study. The DSMB may recommend early termination of the trial due to efficacy or  
18  
19 futility; or for unanticipated concerns for the safety of enrolled infants. Standard procedures for  
20  
21 reporting AEs will be used in accordance with Good Clinical Practice guidelines.  
22  
23  
24  
25

#### 26 Ethics and dissemination

27  
28  
29  
30 The study was initially approved by the Research Ethics Committee at NMH, Dublin, and the Health  
31  
32 Products Regulatory Authority of Ireland. Approval was also obtained at the research ethics  
33  
34 committees at each participating site and at the relevant competent authority for each participating  
35  
36 country. All bodies must be informed in writing of any substantial changes to the protocol, prior to  
37  
38 any such changes being implemented. University College Dublin, Ireland is the sponsor for this study.  
39  
40  
41

#### 42 Screening and consent

43  
44  
45  
46 Prior to the delivery a member of the research team or other senior doctor will approach  
47  
48 parent(s)/guardian(s) of eligible infants to inform them about the study. The team member will  
49  
50 explain the purpose and nature of the study and provide written information for the  
51  
52 parent(s)/guardian(s) to keep. If the local language is not their first language, they will be offered the  
53  
54 opportunity to have an interpreter present while the study is explained. Written consent for  
55  
56 enrolment of the infant in the study will then be sought. Parents will be informed that they may  
57  
58 withdraw their child from the study at any time should they so wish; and that a decision not to  
59  
60

1  
2  
3 consent to their infants' participation in the study or to withdraw their infant from the study once  
4  
5 enrolled will not affect their infant's access to the best available treatment and care.  
6  
7  
8

9  
10 Patient and public involvement (PPI)  
11  
12

13  
14 We liaised with the Irish Neonatal Health Alliance for assistance when designing the parent  
15 information leaflet and consent form. Parent focus groups were held via PedCRIN prior to expansion  
16 of the study to European sites.  
17  
18  
19  
20  
21  
22

23 Recruitment  
24  
25  
26  
27

28 Though the enrolment rates to our studies amongst eligible infants are excellent, we believe it will  
29 be necessary to enrol infants at multiple sites in order to enrol our planned target sample of 250  
30 infants in a timely fashion. We have a track record enlisting the help of collaborators nationally<sup>43</sup> and  
31 internationally<sup>44 45</sup> to perform our studies. We believe that with their help, we can enrol these  
32 infants in 3 years.  
33  
34  
35  
36  
37  
38  
39  
40

41 Current status  
42  
43  
44  
45

46 The trial began recruitment in December 2017, with additional sites joining subsequently. It is  
47 currently recruiting in 9 centres in 6 European countries. It is expected that recruitment for the study  
48 will be completed by December 2020.  
49  
50  
51  
52  
53

54 Publication of results  
55  
56  
57  
58  
59  
60



1  
2  
3 The authors intend to publish the results of this trial in a high-quality, peer-reviewed journal upon  
4 completion of data collection and analysis.  
5  
6  
7

## 8 Discussion 9

10  
11  
12  
13 Oropharyngeal surfactant given immediately after birth to preterm infants at risk of RDS has the  
14 potential to reduce the risk of intubation and ventilation. Endotracheal intubation is invasive and  
15 unpleasant for newborns that is associated with adverse short- and long-term effects. It is also a skill  
16 that is difficult for clinicians to learn and maintain. In contrast, giving surfactant into the oropharynx  
17 is easy and avoids the adverse effects associated with intubation. There is evidence from animal  
18 studies and from case series in humans that it may be effective. This is an attractive proposition,  
19 because it could avoid harms associated with intubation for babies and raises the possibility of giving  
20 surfactant in contexts where it is not currently feasible (e.g. non-tertiary settings, developing  
21 countries). We were unable to credibly mask the intervention and acknowledge this lack of blinding  
22 as a limitation of the study. We tried to minimise potential bias by setting predefined objective  
23 treatment failure criteria, which were agreed on by all participating sites.  
24  
25  
26  
27  
28  
29  
30  
31  
32  
33  
34  
35  
36  
37  
38  
39  
40  
41  
42  
43  
44  
45  
46  
47  
48  
49  
50  
51  
52  
53  
54  
55  
56  
57  
58  
59  
60

Figure 1. Schedule of events

| <u>Procedures</u>            | <u>Screening</u> | <u>Allocation</u> | <u>Post-allocation</u> | <u>Close-out</u> |
|------------------------------|------------------|-------------------|------------------------|------------------|
|                              | Screening        | Day of Birth      | 120 hours after birth  | Discharge home   |
| <b>ENROLMENT</b>             |                  |                   |                        |                  |
| Inclusion/Exclusion Criteria | X                |                   |                        |                  |
| Informed consent             | X                |                   |                        |                  |
| Allocation                   |                  | X                 |                        |                  |
| <b>INTERVENTIONS</b>         |                  |                   |                        |                  |
| Oropharyngeal surfactant     |                  | X                 |                        |                  |
| Standard care - CPAP         |                  | X                 |                        |                  |
| <b>ASSESSMENTS</b>           |                  |                   |                        |                  |
| Baseline variables           |                  | X                 |                        |                  |
| Primary outcome              |                  |                   | X                      |                  |
| Other outcomes               |                  |                   | X                      | X                |

Table 1. 50<sup>th</sup> centile for birth weight (BW) for boys and girls according to gestational age (GA)

| GA (weeks) | Girls BW (kg) | Boys BW (kg) |
|------------|---------------|--------------|
| 23         | 0.550         | 0.600        |
| 24         | 0.650         | 0.700        |
| 25         | 0.775         | 0.800        |
| 26         | 0.850         | 0.900        |
| 27         | 0.975         | 1.050        |
| 28         | 1.100         | 1.150        |

Table 2. Infants &lt; 26 weeks estimated dosing range, following 120mg vial of Curosurf

| GA (weeks) | Girls BW (kg) | Dose (mg/kg) | Boys BW (kg) | Dose (mg/kg) |
|------------|---------------|--------------|--------------|--------------|
| 23         | 0.550         | 218          | 0.600        | 200          |
| 24         | 0.650         | 185          | 0.700        | 171          |
| 25         | 0.775         | 155          | 0.800        | 150          |

Table 3. Infants 26-28<sup>+6</sup> weeks estimating dosing range, following 240mg vial Curosurf

| GA (weeks) | Girls BW (kg) | Dose (mg/kg) | Boys BW (kg) | Dose (mg/kg) |
|------------|---------------|--------------|--------------|--------------|
| 26         | 0.850         | 282          | 0.900        | 267          |
| 27         | 0.975         | 246          | 1.050        | 229          |
| 28         | 1.100         | 218          | 1.150        | 209          |

## References:

1. Avery ME, Mead J. Surface properties in relation to atelectasis and hyaline membrane disease. *AMA J Dis Child* 1959;97(5, Part 1):517-23. [published Online First: 1959/05/01]
2. Fujiwara T MH, Chida S, Morita T, Watabe Y, Abe T. Artificial surfactant therapy in hyaline-membrane disease. *Lancet (London, England)* 1980;1(8159):55-59.
3. Halliday HL. Surfactants: past, present and future. *Journal of perinatology : official journal of the California Perinatal Association* 2008;28 Suppl 1:S47-56. doi: 10.1038/jp.2008.50 [published Online First: 2008/06/18]
4. Enhorning G, Shennan A, Possmayer F, et al. Prevention of neonatal respiratory distress syndrome by tracheal instillation of surfactant: a randomized clinical trial. *Pediatrics* 1985;76(2):145-53. [published Online First: 1985/08/01]
5. Merritt TA, Hallman M, Bloom BT, et al. Prophylactic treatment of very premature infants with human surfactant. *The New England journal of medicine* 1986;315(13):785-90. doi: 10.1056/nejm198609253151301 [published Online First: 1986/09/25]
6. Hallman M, Merritt TA, Jarvenpaa AL, et al. Exogenous human surfactant for treatment of severe respiratory distress syndrome: a randomized prospective clinical trial. *J Pediatr* 1985;106(6):963-9. [published Online First: 1985/06/01]
7. Ten centre trial of artificial surfactant (artificial lung expanding compound) in very premature babies. Ten Centre Study Group. *British medical journal (Clinical research ed)* 1987;294(6578):991-6. [published Online First: 1987/04/18]
8. Avery ME, Tooley WH, Keller JB, et al. Is chronic lung disease in low birth weight infants preventable? A survey of eight centers. *Pediatrics* 1987;79(1):26-30. [published Online First: 1987/01/01]
9. Van Marter LJ, Allred EN, Pagano M, et al. Do clinical markers of barotrauma and oxygen toxicity explain interhospital variation in rates of chronic lung disease? The Neonatology Committee for the Developmental Network. *Pediatrics* 2000;105(6):1194-201. doi: 10.1542/peds.105.6.1194 [published Online First: 2000/06/02]
10. Morley CJ, Davis PG, Doyle LW, et al. Nasal CPAP or intubation at birth for very preterm infants. *The New England journal of medicine* 2008;358(7):700-8. doi: 10.1056/NEJMoa072788 [published Online First: 2008/02/15]
11. Finer NN, Carlo WA, Walsh MC, et al. Early CPAP versus surfactant in extremely preterm infants. *The New England journal of medicine* 2010;362(21):1970-9. doi: 10.1056/NEJMoa0911783 [published Online First: 2010/05/18]
12. Dunn MS, Kaempf J, de Klerk A, et al. Randomized trial comparing 3 approaches to the initial respiratory management of preterm neonates. *Pediatrics* 2011;128(5):e1069-76. doi: 10.1542/peds.2010-3848 [published Online First: 2011/10/26]
13. Rojas-Reyes MX, Morley CJ, Soll R. Prophylactic versus selective use of surfactant in preventing morbidity and mortality in preterm infants. *The Cochrane database of systematic reviews* 2012(3):Cd000510. doi: 10.1002/14651858.CD000510.pub2 [published Online First: 2012/03/16]
14. Dargaville PA, Gerber A, Johansson S, et al. Incidence and Outcome of CPAP Failure in Preterm Infants. *Pediatrics* 2016;138(1) doi: 10.1542/peds.2015-3985 [published Online First: 2016/07/02]

- 1  
2  
3 15. Kelly MA, Finer NN. Nasotracheal intubation in the neonate: physiologic responses and  
4 effects of atropine and pancuronium. *The Journal of pediatrics* 1984;105(2):303-9.  
5 [published Online First: 1984/08/01]  
6
- 7 16. Shangle CE, Haas RH, Vaida F, et al. Effects of endotracheal intubation and surfactant on  
8 a 3-channel neonatal electroencephalogram. *The Journal of pediatrics*  
9 2012;161(2):252-7. doi: 10.1016/j.jpeds.2012.02.014 [published Online First:  
10 2012/03/20]  
11
- 12 17. Marshall TA, Deeder R, Pai S, et al. Physiologic changes associated with endotracheal  
13 intubation in preterm infants. *Critical care medicine* 1984;12(6):501-3. doi:  
14 10.1097/00003246-198406000-00006 [published Online First: 1984/06/01]  
15
- 16 18. Friesen RH, Honda AT, Thieme RE. Changes in anterior fontanel pressure in preterm  
17 neonates during tracheal intubation. *Anesthesia and analgesia* 1987;66(9):874-8.  
18 [published Online First: 1987/09/01]
- 19 19. Barrington KJ, Finer NN, Etches PC. Succinylcholine and atropine for premedication of  
20 the newborn infant before nasotracheal intubation: a randomized, controlled trial.  
21 *Critical care medicine* 1989;17(12):1293-6. doi: 10.1097/00003246-198912000-  
22 00009 [published Online First: 1989/12/01]  
23
- 24 20. Parkin JL, Stevens MH, Jung AL. Acquired and congenital subglottic stenosis in the infant.  
25 *The Annals of otology, rhinology, and laryngology* 1976;85(5 Pt.1):573-81. doi:  
26 10.1177/000348947608500503 [published Online First: 1976/09/01]  
27
- 28 21. Jobe AH IM. Lung development and function in preterm infants in the surfactant  
29 treatment era. *Annu Rev Physiol* 2000;62(825-46)
- 30 22. Bjorklund LJ IJ, Curstedt T, John J, Robertson B, Werner O, Vilstrup CT. Manual  
31 ventilation with a few large breaths at birth compromises the therapeutic effect of  
32 subsequent surfactant replacement in immature lambs. *Pediatr Res* 1997;42(3):348-  
33 55.  
34
- 35 23. More K, Sakhuja P, Shah PS. Minimally invasive surfactant administration in preterm  
36 infants: a meta-narrative review. *JAMA pediatrics* 2014;168(10):901-8. doi:  
37 10.1001/jamapediatrics.2014.1148 [published Online First: 2014/08/05]  
38
- 39 24. Berggren E, Liljedahl M, Winbladh B, et al. Pilot study of nebulized surfactant therapy for  
40 neonatal respiratory distress syndrome. *Acta paediatrica (Oslo, Norway : 1992)*  
41 2000;89(4):460-4. [published Online First: 2000/06/01]  
42
- 43 25. Finer NN MT, Bernstein G, Job L, Mazela J, Segal R. An open label, pilot study of Aerosurf  
44 combined with nCPAP to prevent RDS in preterm neonates. *J Aerosol Med Pulm Drug*  
45 *Deliv* 2010;23(5):303-09.
- 46 26. Minocchieri S, Berry CA, Pillow JJ. Nebulised surfactant to reduce severity of respiratory  
47 distress: a blinded, parallel, randomised controlled trial. *Archives of disease in*  
48 *childhood Fetal and neonatal edition* 2019;104(3):F313-f19. doi:  
49 10.1136/archdischild-2018-315051 [published Online First: 2018/07/28]  
50
- 51 27. Abdel-Latif ME, Osborn DA. Nebulised surfactant in preterm infants with or at risk of  
52 respiratory distress syndrome. *The Cochrane database of systematic reviews*  
53 2012;10:Cd008310. doi: 10.1002/14651858.CD008310.pub2 [published Online First:  
54 2012/10/19]  
55
- 56 28. Gopel W, Kribs A, Ziegler A, et al. Avoidance of mechanical ventilation by surfactant  
57 treatment of spontaneously breathing preterm infants (AMV): an open-label,  
58 randomised, controlled trial. *Lancet (London, England)* 2011;378(9803):1627-34. doi:  
59 10.1016/s0140-6736(11)60986-0 [published Online First: 2011/10/04]  
60

- 1
- 2
- 3
- 4 29. Dargaville PA, Aiyappan A, De Paoli AG, et al. Minimally-invasive surfactant therapy in
- 5 preterm infants on continuous positive airway pressure. *Archives of disease in*
- 6 *childhood Fetal and neonatal edition* 2013;98(2):F122-6. doi: 10.1136/archdischild-
- 7 2011-301314 [published Online First: 2012/06/12]
- 8
- 9 30. Kanmaz HG, Erdeve O, Canpolat FE, et al. Surfactant administration via thin catheter
- 10 during spontaneous breathing: randomized controlled trial. *Pediatrics*
- 11 2013;131(2):e502-9. doi: 10.1542/peds.2012-0603 [published Online First:
- 12 2013/01/30]
- 13
- 14 31. Kribs A, Roll C, Gopel W, et al. Nonintubated Surfactant Application vs Conventional
- 15 Therapy in Extremely Preterm Infants: A Randomized Clinical Trial. *JAMA pediatrics*
- 16 2015;169(8):723-30. doi: 10.1001/jamapediatrics.2015.0504 [published Online First:
- 17 2015/06/09]
- 18
- 19 32. Attridge JT SC, Stukenborg GJ, Kattwinkel J. Administration of rescue surfactant by
- 20 laryngeal mask airway: lessons from a pilot trial. *American journal of perinatology*
- 21 2013;30(3):201-06.
- 22
- 23 33. Barbosa RF, Simoes ESAC, Silva YP. A randomized controlled trial of the laryngeal mask
- 24 airway for surfactant administration in neonates. *Jornal de pediatria* 2017;93(4):343-
- 25 50. doi: 10.1016/j.jpmed.2016.08.007 [published Online First: 2017/01/29]
- 26
- 27 34. Roberts KD, Brown R, Lampland AL, et al. Laryngeal Mask Airway for Surfactant
- 28 Administration in Neonates: A Randomized, Controlled Trial. *The Journal of*
- 29 *pediatrics* 2018;193:40-46.e1. doi: 10.1016/j.jpeds.2017.09.068 [published Online
- 30 First: 2017/11/28]
- 31
- 32 35. Abdel-Latif ME, Osborn DA. Laryngeal mask airway surfactant administration for
- 33 prevention of morbidity and mortality in preterm infants with or at risk of
- 34 respiratory distress syndrome. *The Cochrane database of systematic reviews*
- 35 2011(7):Cd008309. doi: 10.1002/14651858.CD008309.pub2 [published Online First:
- 36 2011/07/08]
- 37
- 38 36. Kattwinkel J, Robinson M, Bloom BT, et al. Technique for intrapartum administration of
- 39 surfactant without requirement for an endotracheal tube. *Journal of perinatology :*
- 40 *official journal of the California Perinatal Association* 2004;24(6):360-5. doi:
- 41 10.1038/sj.jp.7211103 [published Online First: 2004/04/16]
- 42
- 43 37. Lamberska T, Settelmayerova E, Smisek J, et al. Oropharyngeal surfactant can improve
- 44 initial stabilisation and reduce rescue intubation in infants born below 25 weeks of
- 45 gestation. *Acta paediatrica (Oslo, Norway : 1992)* 2018;107(1):73-78. doi:
- 46 10.1111/apa.14060 [published Online First: 2017/09/06]
- 47
- 48 38. Jobe A, Ikegami M, Jacobs H, et al. Surfactant and pulmonary blood flow distributions
- 49 following treatment of premature lambs with natural surfactant. *The Journal of*
- 50 *clinical investigation* 1984;73(3):848-56. doi: 10.1172/jci111280 [published Online
- 51 First: 1984/03/01]
- 52
- 53 39. Cummings JJ, Holm BA, Nickerson PA, et al. Pre- versus post-ventilatory surfactant
- 54 treatment in surfactant-deficient preterm lambs. *Reproduction, fertility, and*
- 55 *development* 1995;7(5):1333-8. [published Online First: 1995/01/01]
- 56
- 57 40. Abdel-Latif ME, Osborn DA. Pharyngeal instillation of surfactant before the first breath
- 58 for prevention of morbidity and mortality in preterm infants at risk of respiratory
- 59 distress syndrome. *The Cochrane database of systematic reviews* 2011(3):Cd008311.
- 60 doi: 10.1002/14651858.CD008311.pub2 [published Online First: 2011/03/18]

- 1  
2  
3  
4  
5  
6  
7  
8  
9  
10  
11  
12  
13  
14  
15  
16  
17  
18  
19  
20  
21  
22  
23  
24  
25  
26  
27  
28  
29  
30  
31  
32  
33  
34  
35  
36  
37  
38  
39  
40  
41  
42  
43  
44  
45  
46  
47  
48  
49  
50  
51  
52  
53  
54  
55  
56  
57  
58  
59  
60
41. Enhorning G, Grossmann G, Robertson B. Pharyngeal deposition of surfactant in the premature rabbit fetus. *Biology of the neonate* 1973;22(1):126-32. [published Online First: 1973/01/01]
  42. Enhorning G, Robertson B, Milne E, et al. Radiologic evaluation of the premature newborn rabbit after pharyngeal deposition of surfactant. *American journal of obstetrics and gynecology* 1975;121(4):475-80. [published Online First: 1975/02/15]
  43. Kieran EA, O'Sullivan A, Miletin J, et al. 2% chlorhexidine-70% isopropyl alcohol versus 10% povidone-iodine for insertion site cleaning before central line insertion in preterm infants: a randomised trial. *Archives of disease in childhood Fetal and neonatal edition* 2018;103(2):F101-f06. doi: 10.1136/archdischild-2016-312193 [published Online First: 2017/10/28]
  44. Stenke E, Kieran EA, McCarthy LK, et al. A randomised trial of placing preterm infants on their back or left side after birth. *Archives of disease in childhood Fetal and neonatal edition* 2016;101(5):F397-400. doi: 10.1136/archdischild-2015-309842 [published Online First: 2016/02/06]
  45. Murphy MC, Heiring C, Doglioni N, et al. Effect of Needle Aspiration of Pneumothorax on Subsequent Chest Drain Insertion in Newborns: A Randomized Clinical Trial. *JAMA pediatrics* 2018;172(7):664-69. doi: 10.1001/jamapediatrics.2018.0623 [published Online First: 2018/05/26]

# BMJ Open

## Study protocol for the POPART study – Prophylactic Oropharyngeal surfactant for Preterm infants: A Randomised Trial

|                                 |                                                                                                                                                                                                                                                                                                                                                                                                                                                                                                                                                                                                                                                                                                        |
|---------------------------------|--------------------------------------------------------------------------------------------------------------------------------------------------------------------------------------------------------------------------------------------------------------------------------------------------------------------------------------------------------------------------------------------------------------------------------------------------------------------------------------------------------------------------------------------------------------------------------------------------------------------------------------------------------------------------------------------------------|
| Journal:                        | <i>BMJ Open</i>                                                                                                                                                                                                                                                                                                                                                                                                                                                                                                                                                                                                                                                                                        |
| Manuscript ID                   | bmjopen-2019-035994.R1                                                                                                                                                                                                                                                                                                                                                                                                                                                                                                                                                                                                                                                                                 |
| Article Type:                   | Protocol                                                                                                                                                                                                                                                                                                                                                                                                                                                                                                                                                                                                                                                                                               |
| Date Submitted by the Author:   | 04-Mar-2020                                                                                                                                                                                                                                                                                                                                                                                                                                                                                                                                                                                                                                                                                            |
| Complete List of Authors:       | murphy, madeleine; National Maternity Hospital, Neonatology; National Children's Research Centre, National Children's Research Centre, Our Lady's Children's Hospital<br>Galligan, Marie; University College Dublin School of Medicine and Medical Science, School of Medicine<br>Molloy, Brenda; University College Dublin School of Medicine and Medical Science, School of Medicine<br>Hussain, Rabia; University College Dublin School of Medicine and Medical Science, School of Medicine<br>Doran, Peter; University College Dublin School of Medicine and Medical Science, School of Medicine<br>ODonnell, Colm; The National Maternity Hospital, Dublin, Ireland, Neonatal Intensive Care Unit |
| <b>Primary Subject Heading</b>: | Paediatrics                                                                                                                                                                                                                                                                                                                                                                                                                                                                                                                                                                                                                                                                                            |
| Secondary Subject Heading:      | Research methods, Paediatrics                                                                                                                                                                                                                                                                                                                                                                                                                                                                                                                                                                                                                                                                          |
| Keywords:                       | NEONATOLOGY, PAEDIATRICS, PERINATOLOGY                                                                                                                                                                                                                                                                                                                                                                                                                                                                                                                                                                                                                                                                 |
|                                 |                                                                                                                                                                                                                                                                                                                                                                                                                                                                                                                                                                                                                                                                                                        |

SCHOLARONE™  
Manuscripts



I, the Submitting Author has the right to grant and does grant on behalf of all authors of the Work (as defined in the below author licence), an exclusive licence and/or a non-exclusive licence for contributions from authors who are: i) UK Crown employees; ii) where BMJ has agreed a CC-BY licence shall apply, and/or iii) in accordance with the terms applicable for US Federal Government officers or employees acting as part of their official duties; on a worldwide, perpetual, irrevocable, royalty-free basis to BMJ Publishing Group Ltd ("BMJ") its licensees and where the relevant Journal is co-owned by BMJ to the co-owners of the Journal, to publish the Work in this journal and any other BMJ products and to exploit all rights, as set out in our [licence](#).

The Submitting Author accepts and understands that any supply made under these terms is made by BMJ to the Submitting Author unless you are acting as an employee on behalf of your employer or a postgraduate student of an affiliated institution which is paying any applicable article publishing charge ("APC") for Open Access articles. Where the Submitting Author wishes to make the Work available on an Open Access basis (and intends to pay the relevant APC), the terms of reuse of such Open Access shall be governed by a Creative Commons licence – details of these licences and which [Creative Commons](#) licence will apply to this Work are set out in our licence referred to above.

Other than as permitted in any relevant BMJ Author's Self Archiving Policies, I confirm this Work has not been accepted for publication elsewhere, is not being considered for publication elsewhere and does not duplicate material already published. I confirm all authors consent to publication of this Work and authorise the granting of this licence.



1  
2  
3 1 **Study protocol for the POPART study – Prophylactic Oropharyngeal surfactant for Preterm infants:**

4  
5 2 **A Randomised Trial**

6  
7 3

8  
9 4 Madeleine C. Murphy,<sup>1-3</sup> Marie Galligan,<sup>3</sup> Brenda Molloy,<sup>3</sup> Rabia Hussain,<sup>3</sup> Peter Doran,<sup>3</sup> Colm P.F.

10  
11 5 O'Donnell<sup>1-3</sup>

12  
13 6 1. National Maternity Hospital, Dublin, Ireland

14  
15 7 2. National Children's Research Centre, Dublin, Ireland

16  
17 8 3. School of Medicine, University College Dublin, Ireland

18  
19 9

20  
21 10 Word count 4308

22  
23 Abstract 318

24  
25 Figures/Tables 4

26  
27 References 55

28  
29 11

30  
31 12 **Trial registration**

32  
33 13 Protocol identification (code or reference number): UCDCRC/16/003

34  
35 14 EudraCT number: 2016-004198-41

36  
37 15 Protocol version 2.0, dated 19.07.19

38  
39 16

40  
41 17 **Trial sponsor**

42  
43 18 University College Dublin

44  
45 19

46  
47 20 **Corresponding Author**

48  
49 21 Address Prof. Colm O'Donnell, Department of Neonatology, National Maternity Hospital,

50  
51 22 Holles Street, Dublin 2, Ireland

52  
53 23 Tel +353 1 6373100

54  
55 24 Email [codonnell@nmh.ie](mailto:codonnell@nmh.ie)

56  
57 25

58  
59 26 **Key words:** Infant, newborn; oropharyngeal surfactant; respiratory distress syndrome; intubation;

60  
61 27 randomised controlled trial

1  
2  
3 1 **Author Contributions:** COD conceived and designed the trial protocol, co-wrote the first draft and  
4  
5 2 revised the manuscript for intellectual content. MCM helped design the trial protocol, co-wrote the  
6  
7 3 first draft and revised the manuscript for intellectual content. MG, BM, RH, and PD helped design  
8  
9 4 the trial protocol and revised the manuscript for intellectual content. MG designed the statistical  
10  
11 5 analysis plan. All authors approved the final manuscript prior to submission.  
12  
13  
14 6

15  
16  
17 7 **Funding:**

18  
19 8 Chiesi Farmaceutici, manufacturers of poractant alfa (Curosurf), supply the study drug free of  
20  
21 9 charge; they had no role in study design; have no role in study conduct; and will have no role in data  
22  
23 10 collection, analysis or interpretation. Further, they will have no role in the decision to present,  
24  
25 11 publish or otherwise report results.  
26

27  
28 12 Madeleine Murphy is the recipient of a Clinical Research Fellowship by the National Children's  
29  
30 13 Research Centre, Dublin (R17637)  
31  
32 14 Pediatric Clinical Research Infrastructure Network (PedCRIN), a Project of the European Union  
33  
34 15 Horizon 2020 programme designed to support the extension of clinical drug trials in children  
35  
36 16 throughout Europe, also support the study.  
37  
38  
39 17

40  
41 18 **Competing interests:** None declared  
42  
43 19

44  
45 20 **Ethics approval:**

46  
47 21 Ireland: Research Ethics Committee, The National Maternity Hospital, Dublin, Ireland; Research  
48  
49 22 Ethics Committee, Coombe Women and Infants University Hospital  
50  
51 23 Belgium: Le Comité d'Ethique du CHR Citadelle  
52  
53 24 Czech Republic: Etická komise, Všeobecné fakultní nemocnice (VFN) v Praze (Ethics Committee of  
54  
55 25 the General University Hospital, Prague)  
56  
57  
58  
59  
60

- 1  
2  
3 1 Norway: Regional komité for medisinsk og helsefaglig forskningsetikk (REK nord) (Regional Ethics  
4  
5 2 Committee, REK, nord)  
6  
7 3 Portugal: Comissão de Ética para a Investigação Clínica, CEIC (National Ethics Committee for Clinical  
8  
9 4 Research)  
10  
11  
12 5 Sweden: Stockholm Regional Ethics Review Board  
13  
14 6

15 7 **Acknowledgements:** We would like to acknowledge the administrative staff at UCD for their advice,  
16  
17 8 and support with the trial thus far. We wish to thank the members of PedCRIN and the Principal  
18  
19 9 Investigators and members of the Clinical Trials Units at all our European sites for facilitating  
20  
21 10 extension of our trial to Europe. POPART Trial Investigators: Jan Miletin, Coombe Women and  
22  
23 11 Infants University Hospital, Dublin, Ireland; Claus Klingenberg, University Northern Norway, Tromsø,  
24  
25 12 Norway; Hans Jørgen Guthe, Haukeland University Hospital, Bergen, Norway; Richard Plavka, Charles  
26  
27 13 University, Prague, Czech Republic; Tomas Juren, University Hospital Brno, Brno, Czech Republic;  
28  
29 14 Vincent Rigo, Le Centre Hospitalier Universitaire, Liege, Belgium; Kajsa Bohlin, Karolinska Institutet,  
30  
31 15 Stockholm, Sweden; and Almerinda Pereira, Hospital de Braga, Braga, Portugal.  
32  
33  
34

35 16 **Data statement:** Members of the Trial Steering Committee will have access to the final dataset. Data  
36  
37 17 will be available on request.  
38  
39  
40  
41  
42  
43  
44  
45  
46  
47  
48  
49  
50  
51  
52  
53  
54  
55  
56  
57  
58  
59  
60

1  
2  
3 1 Abstract  
4

5 2  
6

7 3 Introduction: Many preterm infants develop respiratory distress syndrome (RDS), a condition  
8  
9 4 characterised by a relative lack of surfactant. Endotracheal surfactant therapy revolutionised the  
10  
11 5 care of preterm infants in the 1990s. However, supporting newborns with RDS with continuous  
12  
13 6 positive airway pressure (CPAP) and reserving endotracheal surfactant for those who develop  
14  
15 7 respiratory failure despite CPAP yields better results than intubating all infants for surfactant. Half of  
16  
17 8 preterm infants born before 29 weeks' gestation initially managed with CPAP are intubated for  
18  
19 9 surfactant. Intubation is difficult to learn and associated with adverse effects. Surfactant  
20  
21 10 administration into the oropharynx has been reported in preterm animals and humans and may be  
22  
23 11 effective. We wished to determine whether giving oropharyngeal surfactant at birth reduces the  
24  
25 12 rate of endotracheal intubation for respiratory failure in preterm infants within 120 hours of birth.  
26  
27  
28  
29  
30  
31

32 14 Methods and analysis: POPART (Prophylactic Oropharyngeal surfactant for Preterm infants: A  
33  
34 15 Randomised Trial) is an investigator-led, unblinded, multicentre, randomised, parallel group,  
35  
36 16 controlled trial. Infants are eligible if born at a participating centre before 29 weeks gestational age  
37  
38 17 (GA) and there is a plan to offer intensive care. Infants are excluded if they have major congenital  
39  
40 18 anomalies. Infants are randomised at birth to treatment with oropharyngeal surfactant [120mg vial  
41  
42 19 <26 weeks GA stratum; 240mg vial 26 – 28+6 weeks GA stratum] in addition to CPAP or CPAP alone.  
43  
44  
45 20 The primary outcome is intubation within 120 hours of birth, for bradycardia and/or apnoea despite  
46  
47 21 respiratory support in the delivery room or respiratory failure in the intensive care unit. Secondary  
48  
49 22 outcomes include incidence of mechanical ventilation, endotracheal surfactant use, chronic lung  
50  
51 23 disease, and death before hospital discharge.  
52  
53  
54  
55

56  
57 25 Ethics and dissemination: Approval for the study has been granted by the Research Ethics  
58  
59 26 Committees at the National Maternity Hospital, Dublin, Ireland (EC31.2016), and at each  
60

1  
2  
3 1 participating site. The trial is being conducted at 9 centres in 6 European countries. The study results  
4  
5 2 will be submitted for publication in a peer-reviewed journal.  
6  
7  
8 3  
9  
10 4  
11  
12 5  
13  
14 6  
15  
16 7  
17  
18 8  
19  
20 9  
21  
22 10  
23  
24 11  
25  
26 12  
27  
28 13  
29  
30 14  
31  
32 15  
33  
34 16  
35  
36 17  
37  
38 18  
39  
40 19  
41  
42 20  
43  
44 21  
45  
46 22  
47  
48 23  
49  
50 24  
51  
52 25  
53  
54 26  
55  
56  
57  
58  
59  
60

For peer review only

1  
2  
3 1 Article summary  
4

5 2  
6

7 3 Strengths and limitations of this study  
8

9 4

10 5 • This is the first randomised study to specifically examine the efficacy of giving oropharyngeal  
11 6 surfactant at birth to preterm infants at high risk of developing respiratory distress  
12 7 syndrome.  
13 8

14 9

15 10 • We are enrolling infants < 29 weeks' gestation, including infants at 23 and 24 weeks'  
16 11 gestation, who are most at risk of respiratory distress syndrome.  
17 12

18 13

19 14 • We were unable to credibly mask the intervention.  
20 15

21 16

22 17 • To reduce the risk of bias we used objective criteria for our primary outcome i.e. intubation  
23 18 within 120 hours of life.  
24 19

25 20

26 21 • The multicentre nature of this study will increase the generalisability of its findings.  
27 22

28 23

29 24

30 25

31 26

32 27

33 28

34 29

35 30

36 31

37 32

38 33

39 34

40 35

41 36

42 37

43 38

44 39

45 40

46 41

47 42

48 43

49 44

50 45

51 46

52 47

53 48

54 49

55 50

56 51

57 52

58 53

59 54

60 55

1  
2  
3 1 Background  
4  
5  
6 2  
7  
8 3 Respiratory distress syndrome (RDS) is a lung condition of the preterm infant. The risk of RDS is  
9  
10 4 inversely related to gestational age (GA). Infants with RDS have structural and functional immaturity  
11  
12 5 of their lungs. They also have a relative lack of surfactant,<sup>1</sup> an endogenously produced substance  
13  
14 6 that enables alveoli to expand more easily to recruit and maintain gas within the lung.  
15  
16 7  
17  
18 8 Exogenous surfactant<sup>2,3</sup> is frequently used to treat newborns with RDS and has led to improved  
19  
20 9 outcomes for infants worldwide. Randomised controlled trials (RCTs) in the 1980s – 1990s<sup>4-7</sup>  
21  
22 10 demonstrated that surfactant, given by endotracheal tube (ETT), reduced mortality and air leak  
23  
24 11 among premature infants who were intubated for respiratory failure due to RDS. This led to the  
25  
26 12 widespread practice of intubating all extremely preterm infants for surfactant and ventilation  
27  
28 13 (“prophylactic surfactant”).<sup>5</sup> Prior to the introduction of surfactant into clinical practice, concerns  
29  
30 14 were raised that premature infants who were intubated for respiratory support had worse  
31  
32 15 respiratory outcomes than infants who were managed with the non-invasive respiratory support,  
33  
34 16 nasal continuous positive airway pressure (CPAP).<sup>8</sup> These concerns persisted after the widespread  
35  
36 17 introduction of surfactant.<sup>9</sup> Multicentre RCTs found that starting infants on CPAP may be beneficial  
37  
38 18 when compared with intubation and positive pressure ventilation (PPV); the studies reported  
39  
40 19 decreased duration of mechanical ventilation with potential benefits of reduction of death and or  
41  
42 20 bronchopulmonary dysplasia (BPD).<sup>10-12</sup> Managing premature newborns initially with CPAP and  
43  
44 21 reserving intubation, mechanical ventilation and surfactant for those infants with worsening  
45  
46 22 respiratory failure despite CPAP yields better results than intubating all infants for surfactant  
47  
48 23 administration.<sup>13</sup> About half of premature infants born before 29 weeks’ gestation initially managed  
49  
50 24 with CPAP for RDS are ultimately intubated for surfactant and ventilation.<sup>14</sup>  
51  
52  
53  
54  
55  
56  
57  
58  
59  
60

1  
2  
3 1 Intubation is a procedure that is difficult to learn and is associated with adverse effects, both short<sup>15-</sup>  
4  
5 2 <sup>19</sup> and longer-term.<sup>20-22</sup> This has led many clinicians to investigate alternative methods of surfactant  
6  
7 3 delivery.<sup>23</sup> Giving nebulised surfactant to spontaneously breathing infants has met with limited  
8  
9 4 success.<sup>24-27</sup> Progress has been slow due to the technical difficulties encountered in aerosolising such  
10  
11 5 large molecules, the expense of the equipment needed to do so and the cost of the large amount of  
12  
13 6 surfactant needed to form an aerosol. Interest has largely focussed on less-invasive methods of  
14  
15 7 surfactant administration.  
16  
17 8 Less invasive surfactant administration (LISA) techniques involve introducing either a feeding tube or  
18  
19 9 vascular catheter into the trachea of a spontaneously breathing infant at laryngoscopy.<sup>28-31</sup> LISA is  
20  
21 10 associated with lower rates of mechanical ventilation among preterm infants in randomised<sup>28 31</sup>  
22  
23 11 observational studies.<sup>32</sup> Two year follow up outcomes for infants enrolled in the randomised trial  
24  
25 12 Avoid Mechanical Ventilation,<sup>28</sup> where infants were randomised to surfactant via LISA or to standard  
26  
27 13 care with CPAP and ET instillation of surfactant if necessary, are similar between groups.<sup>33</sup> However,  
28  
29 14 the technique appears more difficult than intubation and the short-term adverse effects of  
30  
31 15 laryngoscopy are not avoided. The procedure is becoming more widely used, but rates vary between  
32  
33 16 countries.<sup>34-37</sup> Concerns regarding the validity and risk of bias within studies, a lack of familiarity with  
34  
35 17 the technique, and patient discomfort have been reported as reasons for not using LISA.<sup>36</sup> Use of  
36  
37 18 sedation and analgesia prior to laryngoscopy is not standard for the LISA procedure.<sup>28</sup> While meta-  
38  
39 19 analyses report that the LISA technique is associated with less death or BPD,<sup>38-40</sup> further RCTs are  
40  
41 20 needed. The Optimist-A trial,<sup>41</sup> evaluating minimally invasive surfactant therapy in preterm infants  
42  
43 21 born between 25 – 28 weeks' gestation is ongoing.  
44  
45 22 The laryngeal mask airway, a supraglottic airway device, may be used as an interface to deliver  
46  
47 23 surfactant.<sup>42-45</sup> However there is currently no device available for use in very low birth weight  
48  
49 24 infants, who constitute the majority of infants diagnosed with RDS.  
50  
51  
52  
53  
54  
55  
56  
57  
58  
59  
60



1  
2  
3 1 Direct administration of surfactant into the pharynx of human infants has been described in  
4  
5 2 randomised<sup>7</sup> and prospective cohort studies.<sup>46 47</sup> It is apparently effective and is an easier technique  
6  
7 3 to perform than endotracheal intubation or passing a feeding tube or vascular catheter into the  
8  
9 4 trachea. Advantages of pharyngeal surfactant use are that it is an easy and cheaper method of  
10  
11 5 administering surfactant and likely causes less discomfort to infants as it avoids the use of a  
12  
13 6 laryngoscope. Giving surfactant early, prior to ventilation, delivers surfactant to a fluid-filled lung,  
14  
15 7 which is spread via a fluid-air interface when the infant starts breathing. Animal studies report that  
16  
17 8 surfactant is distributed more uniformly,<sup>48</sup> and lung function and compliance is better<sup>49</sup> if surfactant  
18  
19 9 is delivered prior to ventilation. If shown to be effective, it may reduce the adverse effects, and  
20  
21 10 additional associated costs, of ventilation.  
22  
23  
24  
25  
26  
27

28 12 A Cochrane review of pharyngeal surfactant<sup>50</sup> did not identify any eligible trials to assess whether  
29  
30 13 pharyngeal installation of surfactant before the first breath prevented morbidity and mortality in  
31  
32 14 infants at risk of RDS. The Ten Centre Study randomised 328 infants born between 25 – 29 weeks'  
33  
34 15 gestation to artificial surfactant therapy or saline. For those randomised to surfactant therapy, the  
35  
36 16 first dose was given via the oropharynx, with subsequent doses given via an ETT if the infant was  
37  
38 17 intubated, however the outcomes of infants who received pharyngeal surfactant alone were not  
39  
40 18 reported. Large well conducted RCTs are needed, due to the evidence from animal<sup>51 52</sup> and  
41  
42 19 observational human studies<sup>46 47</sup> suggesting that pharyngeal surfactant administration is potentially  
43  
44 20 safe, feasible, and may be effective.  
45  
46  
47  
48  
49

50 22 Objective  
51  
52  
53  
54

55 24 We are performing a study to establish whether giving preterm infants surfactant into their  
56  
57 25 oropharynx at birth in addition to CPAP compared with CPAP alone reduces their need for  
58  
59 26 subsequent intubation in the first 5 days of life.  
60

1  
2  
3 1  
45 2 **Methods**  
67 3  
89 4 Trial design  
10  
1112 5  
13

14 6 The POPART trial is an investigator-led, unblinded, multicentre, randomised parallel-group  
15  
16 7 controlled trial. It aims to determine whether administering oropharyngeal surfactant to premature  
17  
18 8 infants at birth in addition to CPAP compared to CPAP alone reduces the rate of intubation for  
19  
20 9 respiratory failure in the first 5 days of life. The trial will recruit 250 infants born <29 weeks GA at  
21  
22 10 participating centres. A schedule of events is seen in figure 1.  
23  
24

25 11  
2627 12 Setting  
28  
2930 13  
31

32 14 The trial is being conducted at 9 neonatal intensive care units (NICUs) in 6 European countries  
33  
34 15 [Ireland (National Maternity Hospital (NMH), Dublin; Coombe Women and Infants University  
35  
36 16 Hospital (CWIUH) Dublin); Norway (University Northern Norway, Tromsø; Haukeland University  
37  
38 17 Hospital, Bergen); Czech Republic (Charles University, Prague; University Hospital Brno, Brno),  
39  
40 18 Belgium (Le Centre Hospitalier Universitaire (CHU), Liege); Sweden (Karolinska Institutet,  
41  
42 19 Stockholm); and Portugal (Hospital de Braga, Braga).  
43  
44

45 20  
4647 21 Participants  
48  
4950 22  
5152 23 Inclusion and exclusion criteria  
53  
5455 24  
56

57 25 Trial subjects are premature infants at risk of RDS. Infants born less than 29 weeks GA are included if  
58  
59 26 the treating physician plans to offer intensive care. Infants are excluded if they have major  
60

1 congenital anomalies (including neural tube defects, major structural cardiac anomalies (excluding  
2 patent ductus arteriosus, ventricular septal defect, atrioventricular septal defect), abdominal wall  
3 defects, congenital diaphragmatic hernia and major dysmorphic features with an abnormal  
4 karyotype) and if the treating physician does not plan to offer intensive care. If there is a known  
5 anomaly prenatally, families are not approached for consent. In the event of a postnatal diagnosis of  
6 the aforementioned conditions, these infants meet criteria for post-randomisation exclusion.  
7 Written informed consent from parent/legal guardian(s) is obtained before delivery. Infants of  
8 multiple gestation and of either sex are eligible to be enrolled.

## 10 Screening and consent

12 Prior to the delivery a member of the research team or other senior doctor approaches  
13 parent(s)/guardian(s) of eligible infants to inform them about the study. The team member explains  
14 the purpose and nature of the study and provides written information for the parent(s)/guardian(s)  
15 to keep. If the local language is not their first language, they are offered the opportunity to have an  
16 interpreter present while the study is explained. Written consent for enrolment of the infant in the  
17 study is then sought. Parents are informed that they may withdraw their child from the study at any  
18 time should they so wish; and that a decision not to consent to their infants' participation in the  
19 study or to withdraw their infant from the study once enrolled does not affect their infant's access  
20 to the best available treatment and care.

## 22 Outcome measures

### 24 Primary outcome

1  
2  
3 1 The primary outcome is the incidence of endotracheal intubation for respiratory failure within 120  
4  
5 2 hours of birth. Enrolled infants are intubated for persistent apnoea and/or bradycardia (HR  
6  
7 3 <100bpm) in the delivery room (DR), or for respiratory failure in the NICU defined as  $\geq 2$  of:

- 8  
9  
10 4 - Clinical signs – worsening tachypnoea; grunting; subcostal, intercostal and/or sternal recession  
11  
12 5 - Acidosis – pH < 7.2 on 2 blood gases (arterial or capillary)  $\geq 30$  minutes apart  
13  
14 6 - Hypoxaemia –  $\text{FiO}_2 > 0.4$  to keep oxygen saturation ( $\text{SpO}_2$ )  $\geq 90\%$  for > 30 minutes  
15  
16 7 - Hypercarbia –  $\text{PCO}_2 > 9.0$  kPa on 2 blood gases (arterial or capillary)  $\geq 30$  minutes apart  
17  
18 8 - Apnoea – recurrent apnoea treated with mask ventilation  
19  
20  
21 9

22  
23 10 The primary outcome is intubation within 120 hours of birth. For the purpose of the primary  
24  
25 11 outcome, infants are recorded as ‘yes’ if they were intubated, briefly intubated for surfactant  
26  
27 12 administration e.g. INSURE, and brief tracheal catheterisation for surfactant administration e.g. LISA  
28  
29 13 technique. We record the treatment plan at the time of intubation. We record whether there is a) a  
30  
31 14 plan for intubation with endotracheal tube, surfactant administration, and continued ventilation; b)  
32  
33 15 a plan for “INSURE” – intubation with ETT, surfactant administration, and immediate (<30 minute)  
34  
35 16 extubation; c) a plan for surfactant administration using LISA technique – surfactant administration  
36  
37 17 through a thin endotracheal catheter; or d) other  
38  
39  
40  
41 18

42  
43 19 We acknowledge that not all infants achieving  $\geq 2$  of the intubation indicators may be intubated.  
44  
45  
46 20  
47  
48 21  
49

50 22 Secondary outcomes  
51  
52 23  
53  
54 24 The secondary outcomes are as follows:

- 55  
56  
57 25 1. Intubation in the DR  
58  
59 26 2. Number of attempts taken to successfully intubate in the DR  
60

- 1
- 2
- 3 1 3. Chest compressions in the DR
- 4
- 5 2 4. Adrenaline administration in the DR
- 6
- 7 3 5. Rectal temperature on admission to the NICU
- 8
- 9 4 6. NICU intubation
- 10
- 11 5 7. Surfactant use before death or hospital discharge
- 12
- 13 6 a. Number of doses, and total dose
- 14
- 15 7 b. Intra-tracheal surfactant received post-intervention
- 16
- 17 8 c. Doses of post-intervention surfactant
- 18
- 19 9 8. Respiratory distress syndrome
- 20
- 21 10 a. Clinical evidence and radiological evidence of respiratory distress at the time of first
- 22
- 23 11 intubation
- 24
- 25 12 9. Incidence of pneumothorax
- 26
- 27 13 a. Incidence of pneumothorax on chest x-ray
- 28
- 29 14 b. Pneumothorax treated with needle aspiration or chest drain insertion
- 30
- 31 15 10. Incidence of pulmonary haemorrhage
- 32
- 33 16 a. Clinical evidence of pulmonary haemorrhage
- 34
- 35 17 11. Mechanical ventilation
- 36
- 37 18 12. Days of mechanical ventilation
- 38
- 39 19 13. Use of postnatal corticosteroids for ventilator dependence
- 40
- 41 20 14. Days of duration of respiratory support (endotracheal ventilation, high-frequency oscillatory
- 42
- 43 21 ventilation, CPAP, heated humidified high-flow nasal cannula O<sub>2</sub>, low flow nasal cannula O<sub>2</sub>)
- 44
- 45 22 15. BPD – supplemental O<sub>2</sub> at 28 days of life
- 46
- 47 23 16. Chronic lung disease of prematurity (CLD) –O<sub>2</sub> treatment at 36 weeks corrected GA; we are
- 48
- 49 24 also recording physiological BPD as determined by physiological oxygen reduction test
- 50
- 51 25 17. Medical treatment for a patent ductus arteriosus (PDA)
- 52
- 53 26 a. Administration of ibuprofen or paracetamol for PDA
- 54
- 55
- 56
- 57
- 58
- 59
- 60

- 1
- 2
- 3 1 18. Surgical treatment for a PDA
- 4
- 5 2 19. Proven necrotising enterocolitis ( $\geq$  Bell's stage 2)
- 6
- 7 3 20. Incidence of Intraventricular haemorrhage (IVH) (any and severe: IVH grade  $\geq$  3)
- 8
- 9 a. Evidence on surveillance cranial ultrasounds performed as standard of care
- 10 4
- 11
- 12 5 21. Incidence of cystic periventricular leukomalacia
- 13
- 14 6 a. Evidence on surveillance cranial ultrasounds performed as standard of care
- 15
- 16 7 22. Retinopathy of prematurity treated with laser photocoagulation or intravitreal injections
- 17
- 18 8 a. Evidence on surveillance ophthalmology review performed as standard of care
- 19
- 20
- 21 9 23. Death before hospital discharge
- 22
- 23 10 24. Survival without BPD at hospital discharge
- 24
- 25 11 25. Survival without CLD at hospital discharge
- 26
- 27 12 26. Duration of first hospitalisation
- 28
- 29 13 27. Use of home oxygen therapy
- 30
- 31
- 32 14 a. Discharged home on oxygen therapy
- 33
- 34
- 35 15

#### 36 16 Investigational medicinal product (IMP)

37

38

39 17

40

41 18 Poractant alfa (Curosurf, Chiesi Farmaceutici, Parma, Italy) is a natural surfactant prepared from

42

43 19 porcine lungs. It is licensed for ET use and administration via thin catheter for the prevention and

44

45 20 treatment of RDS in preterm infants. The dosing recommendations for treatment with Curosurf

46

47 21 when given by ETT are 200mg/kg for established RDS and 100 – 200mg/kg for prophylaxis. Further

48

49 22 doses of 100mg/kg Curosurf may be given to infants who have persistent respiratory distress despite

50

51 23 treatment with surfactant (maximum recommended dose 400mg/kg). It is currently not licensed for

52

53 24 oropharyngeal administration, and therefore this study is examining the off-label use of a licensed

54

55 25 product. The timing or dosage of ET surfactant is not be affected by oropharyngeal surfactant. If an

56

57

58

59

60

1  
2  
3 1 infant is felt to need ET surfactant following initial oropharyngeal administration, then they receive  
4  
5 2 the standard initial dose via ETT.  
6  
7  
8 3  
9

#### 10 4 Randomisation

11 5  
12  
13 6 Infants are randomised (1:1) to receive oropharyngeal surfactant in addition to CPAP or CPAP alone  
14  
15 7 using variable block randomisation, with block sizes of 4, 6 and 8. Randomisation is stratified by  
16  
17 8 participating centre and GA (<26 weeks and 26-28<sup>+6</sup> weeks inclusive). Infants of multiple gestations  
18  
19 9 are randomised as individuals.  
20  
21  
22

23 10

24  
25 11 A computer-generated randomisation schedule using sequential 6-digit randomisation codes was  
26  
27 12 prepared by an independent statistician who was not be involved with subsequent data analysis or  
28  
29 13 interpretation and stored securely on a password-protected computer. Each participating centre is  
30  
31 14 provided with two separate boxes for the two GA strata with consecutively numbered, sealed  
32  
33 15 opaque randomisation envelopes containing the assigned treatment allocation. The boxes  
34  
35 16 containing the envelopes are stored securely in the NICU. An envelope from the appropriate box is  
36  
37 17 opened immediately before birth.  
38  
39  
40

41 18

#### 42 19 Blinding

43 20

44  
45  
46  
47 21 This is an open-label study. The study is not blinded to investigators, subjects, or medical or nursing  
48  
49 22 staff. We are not using a placebo, and in the event of the infant being randomised to the 'CONTROL'  
50  
51 23 arm, then they will be commenced on CPAP immediately after birth. The trial statistician will be  
52  
53 24 blinded for data analysis and will be kept unaware of treatment group assignments. We defined  
54  
55 25 objective criteria for the primary outcome to minimise potential bias.  
56  
57  
58  
59 26  
60

1  
2  
3 1 Intervention arm: Oropharyngeal surfactant  
4

5 2  
6

7 3 Infants randomised to oropharyngeal surfactant receive a dose of poractant alfa (Curosurf, Chiesi  
8

9 4 Farmaceutici, Parma, Italy) immediately after birth, ideally before the cord is clamped e.g. 60  
10

11 5 seconds. If it is given after the cord is clamped, it is given once the infant is placed on the  
12

13 6 resuscitaire. It is given within 5 minutes of birth in all cases. We are recording the timing of cord  
14

15 7 clamping for all patients.  
16  
17

18 8  
19

20 9 The surfactant is warmed prior to being drawn up in a sterile syringe as per manufacturer's  
21

22 10 recommendation. Surfactant is administered by opening the mouth gently and giving the surfactant  
23

24 11 as a single bolus into the oropharynx using a thin flexible catheter attached to the syringe.  
25  
26

27 12  
28

29 13 Infants are not weighed prior to enrolment. The 50<sup>th</sup> centile for birth weight (BW) for boys and girls  
30

31 14 according to GA is shown in table 1. In our study, infants < 26 weeks receive a full 120mg vial of  
32

33 15 Curosurf. We estimate that this provides dosing in the range as indicated in table 2. In our study,  
34

35 16 infants 26 – 28 weeks receive a full 240mg vial of Curosurf, and we estimate that this provides  
36

37 17 dosing in the range as indicated in table 3.  
38  
39

40 18  
41

42 19 Control group: CPAP  
43

44 20  
45

46 21 Infants randomised to the control group do not have anything injected into their oropharynx and are  
47

48 22 stabilised on CPAP in the DR as per routine practice.  
49  
50

51 23  
52

53 24 Clinical management  
54

55 25  
56  
57  
58  
59  
60



1  
2  
3 1 After the initial intervention, infants then receive standard care with CPAP, regardless of their group  
4  
5 2 assignment. DR care is carried out by the neonatal team who are trained in neonatal resuscitation as  
6  
7 3 per the recommendations of the International Liaison Committee on Resuscitation (ILCOR). Infants  
8  
9 4 in both groups are intubated in the DR for persistent apnoea and/or bradycardia despite PPV by  
10  
11 5 mask as per ILCOR recommendations. Infants are not intubated in the DR solely for surfactant  
12  
13 6 administration. All other aspects of neonatal intensive care is at the discretion of the treating  
14  
15 7 physicians. Infants in both groups are treated equally. The frequency of blood gas monitoring is  
16  
17 8 based on the decision of the treating physician. Enrolled infants are intubated if they reach the pre-  
18  
19 9 determined criteria for respiratory failure. After giving endotracheal surfactant for the treatment of  
20  
21 10 RDS, attending clinicians may attempt to extubate the babies immediately or they may elect to  
22  
23 11 ventilate the babies for a longer period at their discretion.  
24  
25  
26  
27  
28  
29  
30  
31

#### 32 14 Data management

33  
34  
35  
36  
37

38 16 Data is collected by the on-site investigators from the patient's clinical notes. This is recorded on a  
39  
40 17 data worksheet and transferred to an electronic Case Report Form (CRF) to be stored in a secure,  
41  
42 18 dedicated, password-protected electronic database. The clinical study monitor and representative of  
43  
44 19 the regulatory authority can directly access source documents for comparison of such data with the  
45  
46 20 data in the electronic CRFs and can verify that the study is carried out in compliance with the  
47  
48 21 protocol and local regulatory requirements.  
49  
50  
51

52 22 The investigators adheres to national and hospital protocols on data use and storage. Data is coded.  
53  
54 23 It is stored in a locked filing cabinet then uploaded onto a password-protected computer in a locked  
55  
56 24 office. Documents are stored safely in confidential conditions. On all study-specific documents other  
57  
58 25 than the signed consent, the subject is referred to by the study subject identification code.  
59  
60

1  
2  
3 1  
45 2 Description of statistical methods  
6  
7 3  
8  
910 4 Trial results will be reported according to the Consolidated Standards of Reporting Trials (CONSORT).  
11

12 5 The flow of patients through the trial will be represented on a CONSORT flow diagram, and the  
13  
14 6 number included in the primary and secondary analyses as well as all reasons for exclusions will be  
15  
16 7 reported per trial arm. Analysis of efficacy endpoints will be carried-out following the Intention-To-  
17  
18 8 Treat principle. A Per-Protocol analysis will also be carried out on the primary endpoint, excluding  
19  
20 9 infants with incomplete data on the primary outcome and infants with any major protocol  
21  
22 10 deviations.  
23  
24  
25  
26 11

27 12 Demographic and baseline data will be summarised by treatment group to evaluate comparability.  
28  
29 1330 14 Primary outcome analysis  
31  
32  
33 15

34  
35  
36 16 The primary outcome will be summarised per group. Ratios of relative risk will be  
37  
38 17 reported with 95% confidence intervals. A two-sided, two-proportion Z test will be  
39  
40 18 carried out to investigate whether the rate of endotracheal intubation differs between  
41  
42 19 intervention and standard-of-care. This analysis will be carried out both on the  
43  
44 20 intention-to-treat set and on the per protocol set.  
45  
46  
47 21

48  
49 22 A competing risks model will be fitted to investigate the effect of the intervention on  
50  
51 23 the primary endpoint, adjusting for competing outcomes (e.g. mortality) that may  
52  
53 24 impact on observation of the primary endpoint.  
54  
55  
56 25

1  
2  
3 1 The sensitivity of the estimated intervention effect to measured covariates of interest,  
4  
5 2 including centre, GA, birth weight, gender, mode of delivery and antenatal  
6  
7 3 corticosteroid treatment, will be evaluated with regression analysis.  
8  
9 4

#### 10 5 Secondary outcome analysis

11 6 Categorical outcomes will be summarised per treatment group, with between-group differences  
12  
13 7 expressed as a relative risk with 95% confidence intervals. A two-sided, two-proportion Z test will be  
14  
15 8 carried out for each categorical outcome to investigate whether the proportion differs between  
16  
17 9 intervention and standard of care. For the important secondary endpoint of death before hospital  
18  
19 10 discharge, regression analysis will be employed to determine sensitivity of the estimated  
20  
21 11 intervention effect to potentially relevant covariates (as specified above for the primary outcome).  
22  
23 12

24 13 Numeric secondary outcomes will be summarised by treatment group and between-group  
25  
26 14 differences will be presented with a 95% confidence interval. A superiority hypothesis test will be  
27  
28 15 carried out to test for a difference in the outcome between control and intervention, using a t-test  
29  
30 16 or a Mann-Whitney U test where relevant.  
31  
32 17

#### 33 18 Subgroup analyses

34 19 Subgroups of interest include infants of different gestational age strata (e.g. less than 26 weeks, and  
35  
36 20 26-28 weeks' gestation at birth), and infants from different participating centres. Subgroup analysis  
37  
38 21 of the primary outcome and the important secondary outcome of death before hospital discharge  
39  
40 22 will be carried out by regression modelling to determine differences in the intervention effect for  
41  
42 23 infants of different GA strata, and infants from different participating centres.  
43  
44 24

#### 45 25 Missing data

46 26  
47  
48  
49  
50  
51  
52  
53  
54  
55  
56  
57  
58  
59  
60

1  
2  
3 1 Any missing data or data anomalies will be communicated to the study site(s) for prompt  
4  
5 2 clarification and resolution. For outcomes missing more than 5% of data in either treatment group,  
6  
7 3 missing data methods will be employed in analysis. For categorical outcomes with censored data,  
8  
9 4 Kaplan-Meier analyses will be used to estimate treatment effect. For other missing data, a suitable  
10  
11 5 imputation method will be selected during blind review of the data.  
12  
13  
14 6

#### 16 7 Sample size and power

18 8  
19  
20 9 The sample size calculation assumed a rate of endotracheal intubation of 46% for infants treated  
21  
22 10 with CPAP alone, and a rate of 28% for infants receiving oropharyngeal surfactant and CPAP. The  
23  
24 11 former was informed by published RCTs showing a rate of mechanical ventilation in the days after  
25  
26 12 birth among preterm infants treated with CPAP alone from 40– 60%<sup>10-12</sup> and rates of CPAP failure of  
27  
28 13 43% reported in a cohort of preterm infants 25 – 28 weeks' gestation initially commenced on  
29  
30 14 CPAP.<sup>14</sup> The latter was informed by a cohort of infants born 26 – 28 weeks' gestation reporting that  
31  
32 15 minimally invasive surfactant techniques reduced the rate of mechanical ventilation to from 46% to  
33  
34 16 28%.<sup>28</sup> Sample size was calculated in G\*power based on a two-sided, two-proportion Z test. A  
35  
36 17 sample size of 125 infants per arm will be required to give a statistical power of 80% at a significance  
37  
38 18 level of 5%, adjusted for an anticipated death rate of 10% (estimated from local data (NMH,  
39  
40 19 Neonatal Clinical Report, 2015).  
41  
42  
43  
44  
45  
46  
47  
48  
49  
50  
51  
52  
53  
54  
55  
56  
57  
58  
59  
60

#### 21 Safety analyses

22  
23 23 Adverse events following administration of oropharyngeal surfactant will be documented. Safety  
24  
25 24 analyses will be carried out on the Safety Set, defined as patients in the intervention arm who  
26  
27 25 received oropharyngeal surfactant and patients who received CPAP only. The frequency of adverse  
28  
29 26 events and the number and percentage of infants reported as having at least one emergent adverse  
30

1 event, will be reported by system organ class and preferred term, by treatment received. The same  
2 description will be performed for serious adverse events (SAE), severe AE, AE treatment-related and  
3 AE leading to IMP withdrawal. Defined SAEs for the study are important medical events, and death  
4 before hospital discharge.

#### 6 Safety monitoring and interim analysis

8 A data safety monitoring board (DSMB) will be established to perform ongoing safety surveillance  
9 and to perform interim analyses on the study data. The DSMB will be an independent committee,  
10 composed of a minimum of three members; at least two will be clinicians with expertise in clinical  
11 trials; at least one member will be a clinician with expertise in neonatology. They will not be blinded  
12 to the intervention groups.

14 The DSMB will meet on a 6-monthly basis after start of the trial and will review the frequency and  
15 severity of AEs in both treatment groups. If they observe any significant excess of SAEs in the  
16 intervention group associated with the intervention, they may recommend premature termination  
17 of the trial on the basis of safety concerns.

19 The DSMB will conduct interim analysis to determine whether the data provide overwhelming  
20 evidence of efficacy or futility, defined as a highly statistically significant difference in the primary  
21 outcome or a highly statistically significant difference in the important secondary outcome of death  
22 before hospital discharge. The type I error rate for interim analysis will be set to 0.001 in accordance  
23 with the Haybittle-Peto stopping boundary. For final analysis, the type I error rate will remain at  
24 0.05. Interim analysis will be carried out after approximately 50% of participants (n=126) have  
25 completed the study. The DSMB may recommend early termination of the trial due to efficacy or  
26 futility; or for unanticipated concerns for the safety of enrolled infants. Standard procedures for

1  
2  
3 1 reporting AEs will be used in accordance with Good Clinical Practice guidelines.  
4  
5

6 2 Ethics and dissemination  
7  
8  
9

10 3 The study was initially approved by the Research Ethics Committee at NMH, Dublin, and the Health  
11  
12 4 Products Regulatory Authority of Ireland. Approval was also obtained at the research ethics  
13  
14 5 committees at each participating site and at the relevant competent authority for each participating  
15  
16 6 country. All bodies are informed in writing of any substantial changes to the protocol, prior to any  
17  
18 7 such changes being implemented. University College Dublin, Ireland is the sponsor for this study.  
19  
20  
21

22 8  
23

24 9 Patient and public involvement (PPI)  
25  
26  
27 10

28  
29 11 We liaised with the Irish Neonatal Health Alliance for assistance when designing the parent  
30  
31 12 information leaflet and consent form. Parent focus groups were held via Pediatric Clinical Research  
32  
33 13 Infrastructure Network (PedCRIN) prior to expansion of the study to European sites.  
34  
35  
36 14

37  
38 15 Recruitment  
39  
40  
41 16

42 17 The National Maternity Hospital is a stand-alone university maternity hospital with a tertiary NICU to  
43  
44 18 which >150 infants <1500g are admitted annually. Approximately 60 babies <29 weeks' gestation are  
45  
46 19 admitted annually. Though the enrolment rates to our studies amongst eligible infants are  
47  
48 20 consistently excellent (> 80%), we believe it is necessary to enrol infants at multiple sites in order to  
49  
50 21 enrol our planned target sample of 250 infants in a timely fashion. We have a track record enlisting  
51  
52 22 the help of collaborators nationally<sup>53</sup> and internationally<sup>54 55</sup> to perform our studies. We believe that  
53  
54  
55 23 with their help, we can enrol these infants in 3 years.  
56  
57  
58 24

59  
60 25 Current status

1  
2  
3 1  
4  
5  
6 2

The trial began recruitment in December 2017, with additional sites joining subsequently. It is currently recruiting in 9 centres in 6 European countries. It is expected that recruitment for the study will be completed by December 2020.

7  
8  
9  
10 4  
11  
12 5  
13  
14 6

## Publication of results

7  
8  
9  
10  
11  
12  
13  
14  
15  
16  
17  
18 7

The authors intend to publish the results of this trial in a high-quality, peer-reviewed journal upon completion of data collection and analysis.

## Discussion

9  
10  
11  
12  
13  
14  
15  
16  
17  
18  
19  
20  
21  
22  
23  
24  
25  
26  
27  
28  
29  
30  
31  
32  
33  
34  
35  
36  
37  
38  
39  
40  
41  
42  
43  
44  
45  
46  
47  
48  
49  
50  
51  
52  
53  
54  
55  
56  
57  
58  
59  
60

Oropharyngeal surfactant given immediately after birth to preterm infants at risk of RDS has the potential to reduce the risk of intubation and ventilation. Endotracheal intubation is invasive and unpleasant for newborns that is associated with adverse short- and long-term effects. It is also a skill that is difficult for clinicians to learn and maintain. In contrast, giving surfactant into the oropharynx is easy and avoids the adverse effects associated with intubation. There is evidence from animal studies and from case series in humans that it may be effective. This is an attractive proposition, because it could avoid harms associated with intubation for babies and raises the possibility of giving surfactant in contexts where it is not currently feasible (e.g. non-tertiary settings, developing countries). We were unable to credibly mask the intervention and acknowledge this lack of blinding as a limitation of the study. We tried to minimise potential bias by setting predefined objective treatment failure criteria, which were agreed on by all participating sites.

1  
2  
3 1  
4  
5 2  
6  
7 3  
8  
9 4  
10  
11  
12 5  
13  
14 6  
15  
16 7  
17  
18  
19  
20  
21  
22  
23  
24  
25  
26  
27 8  
28  
29 9  
30  
31  
32  
33  
34  
35  
36 10  
37  
38  
39 11  
40  
41  
42  
43  
44  
45 12  
46  
47  
48 13  
49  
50 14  
51  
52 15  
53  
54 16  
55  
56 17  
57  
58 18  
59  
60

Figure 1. Schedule of events

Table 1. 50<sup>th</sup> centile for birth weight (BW) for boys and girls according to gestational age (GA)

| GA (weeks) | Girls BW (kg) | Boys BW (kg) |
|------------|---------------|--------------|
| 23         | 0.550         | 0.600        |
| 24         | 0.650         | 0.700        |
| 25         | 0.775         | 0.800        |
| 26         | 0.850         | 0.900        |
| 27         | 0.975         | 1.050        |
| 28         | 1.100         | 1.150        |

Table 2. Infants < 26 weeks estimated dosing range, following 120mg vial of Curosurf

| GA (weeks) | Girls BW (kg) | Dose (mg/kg) | Boys BW (kg) | Dose (mg/kg) |
|------------|---------------|--------------|--------------|--------------|
| 23         | 0.550         | 218          | 0.600        | 200          |
| 24         | 0.650         | 185          | 0.700        | 171          |
| 25         | 0.775         | 155          | 0.800        | 150          |

Table 3. Infants 26-28<sup>+6</sup> weeks estimating dosing range, following 240mg vial Curosurf

| GA (weeks) | Girls BW (kg) | Dose (mg/kg) | Boys BW (kg) | Dose (mg/kg) |
|------------|---------------|--------------|--------------|--------------|
| 26         | 0.850         | 282          | 0.900        | 267          |
| 27         | 0.975         | 246          | 1.050        | 229          |
| 28         | 1.100         | 218          | 1.150        | 209          |



## References:

1. Avery ME, Mead J. Surface properties in relation to atelectasis and hyaline membrane disease. *AMA J Dis Child* 1959;97(5, Part 1):517-23. [published Online First: 1959/05/01]
2. Fujiwara T MH, Chida S, Morita T, Watabe Y, Abe T. Artificial surfactant therapy in hyaline-membrane disease. *Lancet (London, England)* 1980;1(8159):55-59.
3. Halliday HL. Surfactants: past, present and future. *Journal of perinatology : official journal of the California Perinatal Association* 2008;28 Suppl 1:S47-56. doi: 10.1038/jp.2008.50 [published Online First: 2008/06/18]
4. Enhorning G, Shennan A, Possmayer F, et al. Prevention of neonatal respiratory distress syndrome by tracheal instillation of surfactant: a randomized clinical trial. *Pediatrics* 1985;76(2):145-53. [published Online First: 1985/08/01]
5. Merritt TA, Hallman M, Bloom BT, et al. Prophylactic treatment of very premature infants with human surfactant. *The New England journal of medicine* 1986;315(13):785-90. doi: 10.1056/nejm198609253151301 [published Online First: 1986/09/25]
6. Hallman M, Merritt TA, Jarvenpaa AL, et al. Exogenous human surfactant for treatment of severe respiratory distress syndrome: a randomized prospective clinical trial. *J Pediatr* 1985;106(6):963-9. [published Online First: 1985/06/01]
7. Ten centre trial of artificial surfactant (artificial lung expanding compound) in very premature babies. Ten Centre Study Group. *British medical journal (Clinical research ed)* 1987;294(6578):991-6. [published Online First: 1987/04/18]
8. Avery ME, Tooley WH, Keller JB, et al. Is chronic lung disease in low birth weight infants preventable? A survey of eight centers. *Pediatrics* 1987;79(1):26-30. [published Online First: 1987/01/01]
9. Van Marter LJ, Allred EN, Pagano M, et al. Do clinical markers of barotrauma and oxygen toxicity explain interhospital variation in rates of chronic lung disease? The Neonatology Committee for the Developmental Network. *Pediatrics* 2000;105(6):1194-201. doi: 10.1542/peds.105.6.1194 [published Online First: 2000/06/02]
10. Morley CJ, Davis PG, Doyle LW, et al. Nasal CPAP or intubation at birth for very preterm infants. *The New England journal of medicine* 2008;358(7):700-8. doi: 10.1056/NEJMoa072788 [published Online First: 2008/02/15]
11. Finer NN, Carlo WA, Walsh MC, et al. Early CPAP versus surfactant in extremely preterm infants. *The New England journal of medicine* 2010;362(21):1970-9. doi: 10.1056/NEJMoa0911783 [published Online First: 2010/05/18]
12. Dunn MS, Kaempf J, de Klerk A, et al. Randomized trial comparing 3 approaches to the initial respiratory management of preterm neonates. *Pediatrics* 2011;128(5):e1069-76. doi: 10.1542/peds.2010-3848 [published Online First: 2011/10/26]

- 1  
2  
3 1 13. Rojas-Reyes MX, Morley CJ, Soll R. Prophylactic versus selective use of surfactant in  
4 2 preventing morbidity and mortality in preterm infants. *The Cochrane database of*  
5 3 *systematic reviews* 2012(3):Cd000510. doi: 10.1002/14651858.CD000510.pub2  
6 4 [published Online First: 2012/03/16]
- 7 5 14. Dargaville PA, Gerber A, Johansson S, et al. Incidence and Outcome of CPAP Failure in  
8 6 Preterm Infants. *Pediatrics* 2016;138(1) doi: 10.1542/peds.2015-3985 [published  
9 7 Online First: 2016/07/02]
- 10 8 15. Kelly MA, Finer NN. Nasotracheal intubation in the neonate: physiologic responses and  
11 9 effects of atropine and pancuronium. *The Journal of pediatrics* 1984;105(2):303-9.  
12 10 [published Online First: 1984/08/01]
- 13 11 16. Shangle CE, Haas RH, Vaida F, et al. Effects of endotracheal intubation and surfactant on  
14 12 a 3-channel neonatal electroencephalogram. *The Journal of pediatrics*  
15 13 2012;161(2):252-7. doi: 10.1016/j.jpeds.2012.02.014 [published Online First:  
16 14 2012/03/20]
- 17 15 17. Marshall TA, Deeder R, Pai S, et al. Physiologic changes associated with endotracheal  
18 16 intubation in preterm infants. *Critical care medicine* 1984;12(6):501-3. doi:  
19 17 10.1097/00003246-198406000-00006 [published Online First: 1984/06/01]
- 20 18 18. Friesen RH, Honda AT, Thieme RE. Changes in anterior fontanel pressure in preterm  
21 19 neonates during tracheal intubation. *Anesthesia and analgesia* 1987;66(9):874-8.  
22 20 [published Online First: 1987/09/01]
- 23 21 19. Barrington KJ, Finer NN, Etches PC. Succinylcholine and atropine for premedication of  
24 22 the newborn infant before nasotracheal intubation: a randomized, controlled trial.  
25 23 *Critical care medicine* 1989;17(12):1293-6. doi: 10.1097/00003246-198912000-  
26 24 00009 [published Online First: 1989/12/01]
- 27 25 20. Parkin JL, Stevens MH, Jung AL. Acquired and congenital subglottic stenosis in the infant.  
28 26 *The Annals of otology, rhinology, and laryngology* 1976;85(5 Pt.1):573-81. doi:  
29 27 10.1177/000348947608500503 [published Online First: 1976/09/01]
- 30 28 21. Jobe AH IM. Lung development and function in preterm infants in the surfactant  
31 29 treatment era. *Annu Rev Physiol* 2000;62(825-46)
- 32 30 22. Bjorklund LJ IJ, Curstedt T, John J, Robertson B, Werner O, Vilstrup CT. Manual  
33 31 ventilation with a few large breaths at birth compromises the therapeutic effect of  
34 32 subsequent surfactant replacement in immature lambs. *Pediatr Res* 1997;42(3):348-  
35 33 55.
- 36 34 23. More K, Sakhuja P, Shah PS. Minimally invasive surfactant administration in preterm  
37 35 infants: a meta-narrative review. *JAMA pediatrics* 2014;168(10):901-8. doi:  
38 36 10.1001/jamapediatrics.2014.1148 [published Online First: 2014/08/05]
- 39 37 24. Berggren E, Liljedahl M, Winbladh B, et al. Pilot study of nebulized surfactant therapy for  
40 38 neonatal respiratory distress syndrome. *Acta paediatrica (Oslo, Norway : 1992)*  
41 39 2000;89(4):460-4. [published Online First: 2000/06/01]
- 42 40 25. Finer NN MT, Bernstein G, Job L, Mazela J, Segal R. An open label, pilot study of Aerosurf  
43 41 combined with nCPAP to prevent RDS in preterm neonates. *J Aerosol Med Pulm Drug*  
44 42 *Deliv* 2010;23(5):303-09.
- 45 43 26. Minocchieri S, Berry CA, Pillow JJ. Nebulised surfactant to reduce severity of respiratory  
46 44 distress: a blinded, parallel, randomised controlled trial. *Archives of disease in*  
47 45 *childhood Fetal and neonatal edition* 2019;104(3):F313-f19. doi:  
48 46 10.1136/archdischild-2018-315051 [published Online First: 2018/07/28]

- 1 27. Abdel-Latif ME, Osborn DA. Nebulised surfactant in preterm infants with or at risk of  
2 respiratory distress syndrome. *The Cochrane database of systematic reviews*  
3 2012;10:Cd008310. doi: 10.1002/14651858.CD008310.pub2 [published Online First:  
4 2012/10/19]
- 5 28. Gopel W, Kribs A, Ziegler A, et al. Avoidance of mechanical ventilation by surfactant  
6 treatment of spontaneously breathing preterm infants (AMV): an open-label,  
7 randomised, controlled trial. *Lancet (London, England)* 2011;378(9803):1627-34. doi:  
8 10.1016/s0140-6736(11)60986-0 [published Online First: 2011/10/04]
- 9 29. Dargaville PA, Aiyappan A, De Paoli AG, et al. Minimally-invasive surfactant therapy in  
10 preterm infants on continuous positive airway pressure. *Archives of disease in*  
11 *childhood Fetal and neonatal edition* 2013;98(2):F122-6. doi: 10.1136/archdischild-  
12 2011-301314 [published Online First: 2012/06/12]
- 13 30. Kanmaz HG, Erdeve O, Canpolat FE, et al. Surfactant administration via thin catheter  
14 during spontaneous breathing: randomized controlled trial. *Pediatrics*  
15 2013;131(2):e502-9. doi: 10.1542/peds.2012-0603 [published Online First:  
16 2013/01/30]
- 17 31. Kribs A, Roll C, Gopel W, et al. Nonintubated Surfactant Application vs Conventional  
18 Therapy in Extremely Preterm Infants: A Randomized Clinical Trial. *JAMA pediatrics*  
19 2015;169(8):723-30. doi: 10.1001/jamapediatrics.2015.0504 [published Online First:  
20 2015/06/09]
- 21 32. Gopel W, Kribs A, Hartel C, et al. Less invasive surfactant administration is associated  
22 with improved pulmonary outcomes in spontaneously breathing preterm infants.  
23 *Acta paediatrica (Oslo, Norway : 1992)* 2015;104(3):241-6. doi: 10.1111/apa.12883  
24 [published Online First: 2014/12/05]
- 25 33. Herting E, Kribs A, Hartel C, et al. Two-year outcome data suggest that less invasive  
26 surfactant administration (LISA) is safe. Results from the follow-up of the  
27 randomized controlled AMV (avoid mechanical ventilation) study. *European journal*  
28 *of pediatrics* 2020 doi: 10.1007/s00431-020-03572-0 [published Online First:  
29 2020/02/19]
- 30 34. Klotz D, Porcaro U, Fleck T, et al. European perspective on less invasive surfactant  
31 administration-a survey. *European journal of pediatrics* 2017;176(2):147-54. doi:  
32 10.1007/s00431-016-2812-9 [published Online First: 2016/12/13]
- 33 35. Beltempo M, Isayama T, Vento M, et al. Respiratory Management of Extremely Preterm  
34 Infants: An International Survey. *Neonatology* 2018;114(1):28-36. doi:  
35 10.1159/000487987 [published Online First: 2018/04/16]
- 36 36. Heiring C, Jonsson B, Andersson S, et al. Survey shows large differences between the  
37 Nordic countries in the use of less invasive surfactant administration. *Acta*  
38 *paediatrica (Oslo, Norway : 1992)* 2017;106(3):382-86. doi: 10.1111/apa.13694  
39 [published Online First: 2016/12/20]
- 40 37. Kurepa D, Perveen S, Lipener Y, et al. The use of less invasive surfactant administration  
41 (LISA) in the United States with review of the literature. *Journal of perinatology :*  
42 *official journal of the California Perinatal Association* 2019;39(3):426-32. doi:  
43 10.1038/s41372-018-0302-9 [published Online First: 2019/01/13]
- 44 38. Rigo V, Lefebvre C, Broux I. Surfactant instillation in spontaneously breathing preterm  
45 infants: a systematic review and meta-analysis. *European journal of pediatrics*  
46 2016;175(12):1933-42. doi: 10.1007/s00431-016-2789-4 [published Online First:  
47 2016/09/30]

- 1  
2  
3 1 39. Isayama T, Iwami H, McDonald S, et al. Association of Noninvasive Ventilation Strategies  
4 2 With Mortality and Bronchopulmonary Dysplasia Among Preterm Infants: A  
5 3 Systematic Review and Meta-analysis. *Jama* 2016;316(6):611-24. doi:  
6 4 10.1001/jama.2016.10708 [published Online First: 2016/08/18]  
7 5  
8 6 40. Aldana-Aguirre JC, Pinto M, Featherstone RM, et al. Less invasive surfactant  
9 7 administration versus intubation for surfactant delivery in preterm infants with  
10 8 respiratory distress syndrome: a systematic review and meta-analysis. *Archives of*  
11 9 *disease in childhood Fetal and neonatal edition* 2017;102(1):F17-f23. doi:  
12 10 10.1136/archdischild-2015-310299 [published Online First: 2016/11/18]  
13 11  
14 12 41. Dargaville PA, Kamlin CO, De Paoli AG, et al. The OPTIMIST-A trial: evaluation of  
15 13 minimally-invasive surfactant therapy in preterm infants 25-28 weeks gestation.  
16 14 *BMC pediatrics* 2014;14:213. doi: 10.1186/1471-2431-14-213 [published Online First:  
17 15 2014/08/29]  
18 16  
19 17 42. Attridge JT SC, Stukenborg GJ, Kattwinkel J. Administration of rescue surfactant by  
20 18 laryngeal mask airway: lessons from a pilot trial. *American journal of perinatology*  
21 19 2013;30(3):201-06.  
22 20  
23 21 43. Barbosa RF, Simoes ESAC, Silva YP. A randomized controlled trial of the laryngeal mask  
24 22 airway for surfactant administration in neonates. *Jornal de pediatria* 2017;93(4):343-  
25 23 50. doi: 10.1016/j.jpmed.2016.08.007 [published Online First: 2017/01/29]  
26 24  
27 25 44. Roberts KD, Brown R, Lampland AL, et al. Laryngeal Mask Airway for Surfactant  
28 26 Administration in Neonates: A Randomized, Controlled Trial. *The Journal of*  
29 27 *pediatrics* 2018;193:40-46.e1. doi: 10.1016/j.jpeds.2017.09.068 [published Online  
30 28 First: 2017/11/28]  
31 29  
32 30 45. Abdel-Latif ME, Osborn DA. Laryngeal mask airway surfactant administration for  
33 31 prevention of morbidity and mortality in preterm infants with or at risk of  
34 32 respiratory distress syndrome. *The Cochrane database of systematic reviews*  
35 33 2011(7):Cd008309. doi: 10.1002/14651858.CD008309.pub2 [published Online First:  
36 34 2011/07/08]  
37 35  
38 36 46. Kattwinkel J, Robinson M, Bloom BT, et al. Technique for intrapartum administration of  
39 37 surfactant without requirement for an endotracheal tube. *Journal of perinatology :*  
40 38 *official journal of the California Perinatal Association* 2004;24(6):360-5. doi:  
41 39 10.1038/sj.jp.7211103 [published Online First: 2004/04/16]  
42 40  
43 41 47. Lamberska T, Settlemayerova E, Smisek J, et al. Oropharyngeal surfactant can improve  
44 42 initial stabilisation and reduce rescue intubation in infants born below 25 weeks of  
45 43 gestation. *Acta paediatrica (Oslo, Norway : 1992)* 2018;107(1):73-78. doi:  
46 44 10.1111/apa.14060 [published Online First: 2017/09/06]  
47 45  
48 46 48. Jobe A, Ikegami M, Jacobs H, et al. Surfactant and pulmonary blood flow distributions  
49 47 following treatment of premature lambs with natural surfactant. *The Journal of*  
50 48 *clinical investigation* 1984;73(3):848-56. doi: 10.1172/jci111280 [published Online  
51 49 First: 1984/03/01]  
52 50  
53 51 49. Cummings JJ, Holm BA, Nickerson PA, et al. Pre- versus post-ventilatory surfactant  
54 52 treatment in surfactant-deficient preterm lambs. *Reproduction, fertility, and*  
55 53 *development* 1995;7(5):1333-8. [published Online First: 1995/01/01]  
56 54  
57 55 50. Abdel-Latif ME, Osborn DA. Pharyngeal instillation of surfactant before the first breath  
58 56 for prevention of morbidity and mortality in preterm infants at risk of respiratory  
59 57 distress syndrome. *The Cochrane database of systematic reviews* 2011(3):Cd008311.  
60 58 doi: 10.1002/14651858.CD008311.pub2 [published Online First: 2011/03/18]

- 1  
2  
3  
4 1 51. Enhorning G, Grossmann G, Robertson B. Pharyngeal deposition of surfactant in the  
5 2 premature rabbit fetus. *Biology of the neonate* 1973;22(1):126-32. [published Online  
6 3 First: 1973/01/01]  
7 4 52. Enhorning G, Robertson B, Milne E, et al. Radiologic evaluation of the premature  
8 5 newborn rabbit after pharyngeal deposition of surfactant. *American journal of  
9 6 obstetrics and gynecology* 1975;121(4):475-80. [published Online First: 1975/02/15]  
10 7 53. Kieran EA, O'Sullivan A, Miletin J, et al. 2% chlorhexidine-70% isopropyl alcohol versus  
11 8 10% povidone-iodine for insertion site cleaning before central line insertion in  
12 9 preterm infants: a randomised trial. *Archives of disease in childhood Fetal and  
13 10 neonatal edition* 2018;103(2):F101-f06. doi: 10.1136/archdischild-2016-312193  
14 11 [published Online First: 2017/10/28]  
15 12 54. Stenke E, Kieran EA, McCarthy LK, et al. A randomised trial of placing preterm infants on  
16 13 their back or left side after birth. *Archives of disease in childhood Fetal and neonatal  
17 14 edition* 2016;101(5):F397-400. doi: 10.1136/archdischild-2015-309842 [published  
18 15 Online First: 2016/02/06]  
19 16 55. Murphy MC, Heiring C, Doglioni N, et al. Effect of Needle Aspiration of Pneumothorax on  
20 17 Subsequent Chest Drain Insertion in Newborns: A Randomized Clinical Trial. *JAMA  
21 18 pediatrics* 2018;172(7):664-69. doi: 10.1001/jamapediatrics.2018.0623 [published  
22 19 Online First: 2018/05/26]  
23 20  
24  
25  
26  
27  
28  
29 21  
30  
31 22  
32  
33  
34  
35  
36  
37  
38  
39  
40  
41  
42  
43  
44  
45  
46  
47  
48  
49  
50  
51  
52  
53  
54  
55  
56  
57  
58  
59  
60

| <b><u>Procedures</u></b>     | <b><u>Screening</u></b> | <b><u>Allocation</u></b> | <b><u>Post-allocation</u></b> | <b><u>Close-out</u></b> |
|------------------------------|-------------------------|--------------------------|-------------------------------|-------------------------|
|                              | Screening               | Day of Birth             | 120 hours after birth         | Discharge home          |
| ENROLMENT                    |                         |                          |                               |                         |
| Inclusion/Exclusion Criteria | X                       |                          |                               |                         |
| Informed consent             | X                       |                          |                               |                         |
| Allocation                   |                         | x                        |                               |                         |
| INTERVENTIONS                |                         |                          |                               |                         |
| Oropharyngeal surfactant     |                         | x                        |                               |                         |
| Standard care - CPAP         |                         | x                        |                               |                         |
| ASSESSMENTS                  |                         |                          |                               |                         |
| Baseline variables           |                         | x                        |                               |                         |
| Primary outcome              |                         |                          | x                             |                         |
| Other outcomes               |                         |                          | x                             | x                       |

Schedule of events

150x82mm (300 x 300 DPI)

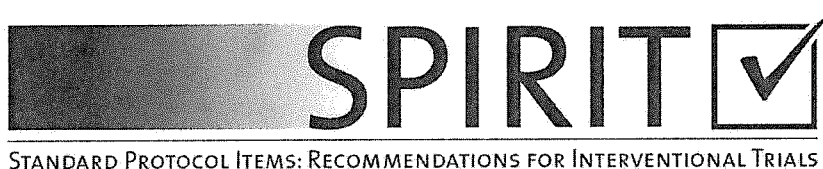

SPIRIT 2013 Checklist: Recommended items to address in a clinical trial protocol and related documents\*

| Section/item                                                             | Item No | Description                                                                                                                                                                                                                                                                              |
|--------------------------------------------------------------------------|---------|------------------------------------------------------------------------------------------------------------------------------------------------------------------------------------------------------------------------------------------------------------------------------------------|
| <b>Administrative information</b>                                        |         |                                                                                                                                                                                                                                                                                          |
| Title<br><i>Page 1</i>                                                   | 1       | Descriptive title identifying the study design, population, interventions, and, if applicable, trial acronym                                                                                                                                                                             |
| Trial registration<br><i>P1, line 12</i>                                 | 2a      | Trial identifier and registry name. If not yet registered, name of intended registry                                                                                                                                                                                                     |
|                                                                          | 2b      | All items from the World Health Organization Trial Registration Data Set                                                                                                                                                                                                                 |
| Protocol version<br><i>P1 line 15</i>                                    | 3       | Date and version identifier                                                                                                                                                                                                                                                              |
| Funding<br><i>Page 2 line 7</i>                                          | 4       | Sources and types of financial, material, and other support                                                                                                                                                                                                                              |
| Roles and responsibilities<br><i>Page 1 Line 17</i><br><i>Page 2 + 3</i> | 5a      | Names, affiliations, and roles of protocol contributors                                                                                                                                                                                                                                  |
|                                                                          | 5b      | Name and contact information for the trial sponsor                                                                                                                                                                                                                                       |
|                                                                          | 5c      | Role of study sponsor and funders, if any, in study design; collection, management, analysis, and interpretation of data; writing of the report; and the decision to submit the report for publication, including whether they will have ultimate authority over any of these activities |
|                                                                          | 5d      | Composition, roles, and responsibilities of the coordinating centre, steering committee, endpoint adjudication committee, data management team, and other individuals or groups overseeing the trial, if applicable (see Item 21a for data monitoring committee)                         |
| <b>Introduction</b>                                                      |         |                                                                                                                                                                                                                                                                                          |
| Background and rationale<br><i>Page 7</i>                                | 6a      | Description of research question and justification for undertaking the trial, including summary of relevant studies (published and unpublished) examining benefits and harms for each intervention                                                                                       |
|                                                                          | 6b      | Explanation for choice of comparators                                                                                                                                                                                                                                                    |
| Objectives<br><i>Page 9 line 22</i>                                      | 7       | Specific objectives or hypotheses                                                                                                                                                                                                                                                        |
| Trial design<br><i>Page 10 line 6</i>                                    | 8       | Description of trial design including type of trial (eg, parallel group, crossover, factorial, single group), allocation ratio, and framework (eg, superiority, equivalence, noninferiority, exploratory)                                                                                |

**Methods: Participants, interventions, and outcomes**

|    |                      |     |                                                                               |
|----|----------------------|-----|-------------------------------------------------------------------------------|
| 1  |                      |     |                                                                               |
| 2  |                      |     |                                                                               |
| 3  |                      |     |                                                                               |
| 4  | Study setting        | 9   | Description of study settings (eg, community clinic, academic hospital)       |
| 5  | Page 10 line 12      |     | and list of countries where data will be collected. Reference to where        |
| 6  |                      |     | list of study sites can be obtained                                           |
| 7  |                      |     |                                                                               |
| 8  |                      |     |                                                                               |
| 9  | Eligibility criteria | 10  | Inclusion and exclusion criteria for participants. If applicable, eligibility |
| 10 | Page 10 line 23      |     | criteria for study centres and individuals who will perform the               |
| 11 |                      |     | interventions (eg, surgeons, psychotherapists)                                |
| 12 |                      |     |                                                                               |
| 13 | Interventions        | 11a | Interventions for each group with sufficient detail to allow replication,     |
| 14 | Page 15              |     | including how and when they will be administered                              |
| 15 | Line 1               |     |                                                                               |
| 16 |                      | 11b | Criteria for discontinuing or modifying allocated interventions for a         |
| 17 |                      |     | given trial participant (eg, drug dose change in response to harms,           |
| 18 |                      |     | participant request, or improving/worsening disease)                          |
| 19 |                      |     |                                                                               |
| 20 |                      | 11c | Strategies to improve adherence to intervention protocols, and any            |
| 21 |                      |     | procedures for monitoring adherence (eg, drug tablet return,                  |
| 22 |                      |     | laboratory tests)                                                             |
| 23 |                      |     |                                                                               |
| 24 |                      |     |                                                                               |
| 25 |                      | 11d | Relevant concomitant care and interventions that are permitted or             |
| 26 |                      |     | prohibited during the trial                                                   |
| 27 |                      |     |                                                                               |
| 28 | Outcomes             | 12  | Primary, secondary, and other outcomes, including the specific                |
| 29 | Page 11 line 24      |     | measurement variable (eg, systolic blood pressure), analysis metric           |
| 30 |                      |     | (eg, change from baseline, final value, time to event), method of             |
| 31 |                      |     | aggregation (eg, median, proportion), and time point for each                 |
| 32 |                      |     | outcome. Explanation of the clinical relevance of chosen efficacy and         |
| 33 |                      |     | harm outcomes is strongly recommended                                         |
| 34 |                      |     |                                                                               |
| 35 |                      |     |                                                                               |
| 36 | Participant          | 13  | Time schedule of enrolment, interventions (including any run-ins and          |
| 37 | timeline             |     | washouts), assessments, and visits for participants. A schematic              |
| 38 | Page 10 line 10      |     | diagram is highly recommended (see Figure)                                    |
| 39 | (Page 22 line 15)    |     |                                                                               |
| 40 |                      |     |                                                                               |
| 41 | Sample size          | 14  | Estimated number of participants needed to achieve study objectives           |
| 42 | Page 10              |     | and how it was determined, including clinical and statistical                 |
| 43 | Line 7               |     | assumptions supporting any sample size calculations                           |
| 44 |                      |     |                                                                               |
| 45 | Recruitment          | 15  | Strategies for achieving adequate participant enrolment to reach              |
| 46 | Page 12 line 15      |     | target sample size                                                            |
| 47 |                      |     |                                                                               |
| 48 |                      |     |                                                                               |

**Methods: Assignment of interventions (for controlled trials)**

## Allocation:

|    |                |     |                                                                        |
|----|----------------|-----|------------------------------------------------------------------------|
| 51 |                |     |                                                                        |
| 52 |                |     |                                                                        |
| 53 | Sequence       | 16a | Method of generating the allocation sequence (eg, computer-            |
| 54 | generation     |     | generated random numbers), and list of any factors for stratification. |
| 55 | Page 15 line 4 |     | To reduce predictability of a random sequence, details of any planned  |
| 56 |                |     | restriction (eg, blocking) should be provided in a separate document   |
| 57 |                |     | that is unavailable to those who enrol participants or assign          |
| 58 |                |     | interventions                                                          |
| 59 |                |     |                                                                        |
| 60 |                |     |                                                                        |



- 1  
2 Allocation 16b Mechanism of implementing the allocation sequence (eg, central  
3 concealment telephone; sequentially numbered, opaque, sealed envelopes),  
4 mechanism describing any steps to conceal the sequence until interventions are  
5 assigned  
6 *Page 15 Line 15*
- 7 Implementation 16c Who will generate the allocation sequence, who will enrol participants,  
8 and who will assign participants to interventions  
9 *Page 15 Line 14*
- 10 Blinding 17a Who will be blinded after assignment to interventions (eg, trial  
11 (masking) participants, care providers, outcome assessors, data analysts), and  
12 how  
13 *Page 15*  
14 *Line 19*
- 15 17b If blinded, circumstances under which unblinding is permissible, and  
16 procedure for revealing a participant's allocated intervention during  
17 the trial  
18  
19

### 20 **Methods: Data collection, management, and analysis**

- 21 Data collection 18a Plans for assessment and collection of outcome, baseline, and other  
22 methods trial data, including any related processes to promote data quality (eg,  
23 duplicate measurements, training of assessors) and a description of  
24 study instruments (eg, questionnaires, laboratory tests) along with  
25 their reliability and validity, if known. Reference to where data  
26 collection forms can be found, if not in the protocol  
27 *P17 Line 16*
- 28 18b Plans to promote participant retention and complete follow-up,  
29 including list of any outcome data to be collected for participants who  
30 discontinue or deviate from intervention protocols  
31 *P19 Line 25*
- 32 Data 19 Plans for data entry, coding, security, and storage, including any  
33 management related processes to promote data quality (eg, double data entry;  
34 range checks for data values). Reference to where details of data  
35 management procedures can be found, if not in the protocol  
36 *Page 17 Line 22*
- 37 Statistical 20a Statistical methods for analysing primary and secondary outcomes.  
38 methods Reference to where other details of the statistical analysis plan can be  
39 found, if not in the protocol  
40 *P18 Line 2*
- 41 20b Methods for any additional analyses (eg, subgroup and adjusted  
42 analyses)  
43  
44 20c Definition of analysis population relating to protocol non-adherence  
45 (eg, as randomised analysis), and any statistical methods to handle  
46 missing data (eg, multiple imputation)  
47  
48  
49  
50  
51

### 52 **Methods: Monitoring**

- 53 Data monitoring 21a Composition of data monitoring committee (DMC); summary of its role  
54 and reporting structure; statement of whether it is independent from  
55 the sponsor and competing interests; and reference to where further  
56 details about its charter can be found, if not in the protocol.  
57 Alternatively, an explanation of why a DMC is not needed  
58 *Page 21*  
59 *Line 6*  
60

|    |                                 |                           |                                                                                                                                                                                                                                                                                     |
|----|---------------------------------|---------------------------|-------------------------------------------------------------------------------------------------------------------------------------------------------------------------------------------------------------------------------------------------------------------------------------|
| 1  |                                 |                           |                                                                                                                                                                                                                                                                                     |
| 2  |                                 | 21b                       | Description of any interim analyses and stopping guidelines, including who will have access to these interim results and make the final decision to terminate the trial                                                                                                             |
| 3  |                                 |                           |                                                                                                                                                                                                                                                                                     |
| 4  |                                 |                           |                                                                                                                                                                                                                                                                                     |
| 5  |                                 |                           |                                                                                                                                                                                                                                                                                     |
| 6  |                                 |                           |                                                                                                                                                                                                                                                                                     |
| 7  | Harms                           | 22                        | Plans for collecting, assessing, reporting, and managing solicited and spontaneously reported adverse events and other unintended effects of trial interventions or trial conduct                                                                                                   |
| 8  | <i>Page 20</i>                  |                           |                                                                                                                                                                                                                                                                                     |
| 9  | <i>Line 23</i>                  |                           |                                                                                                                                                                                                                                                                                     |
| 10 |                                 |                           |                                                                                                                                                                                                                                                                                     |
| 11 | Auditing                        | 23                        | Frequency and procedures for auditing trial conduct, if any, and whether the process will be independent from investigators and the sponsor                                                                                                                                         |
| 12 | <i>Page 17</i>                  |                           |                                                                                                                                                                                                                                                                                     |
| 13 | <i>Line 18</i>                  |                           |                                                                                                                                                                                                                                                                                     |
| 14 |                                 |                           |                                                                                                                                                                                                                                                                                     |
| 15 |                                 |                           |                                                                                                                                                                                                                                                                                     |
| 16 | <b>Ethics and dissemination</b> |                           |                                                                                                                                                                                                                                                                                     |
| 17 |                                 |                           |                                                                                                                                                                                                                                                                                     |
| 18 | Research ethics approval        | 24                        | Plans for seeking research ethics committee/institutional review board (REC/IRB) approval                                                                                                                                                                                           |
| 19 | <i>Page 22 line 2</i>           | <i>and Page 2 line 10</i> |                                                                                                                                                                                                                                                                                     |
| 20 | Protocol amendments             | 25                        | Plans for communicating important protocol modifications (eg, changes to eligibility criteria, outcomes, analyses) to relevant parties (eg, investigators, REC/IRBs, trial participants, trial registries, journals, regulators)                                                    |
| 21 | <i>Page 22</i>                  |                           |                                                                                                                                                                                                                                                                                     |
| 22 | <i>Line 6</i>                   |                           |                                                                                                                                                                                                                                                                                     |
| 23 |                                 |                           |                                                                                                                                                                                                                                                                                     |
| 24 |                                 |                           |                                                                                                                                                                                                                                                                                     |
| 25 |                                 |                           |                                                                                                                                                                                                                                                                                     |
| 26 | Consent or assent               | 26a                       | Who will obtain informed consent or assent from potential trial participants or authorised surrogates, and how (see Item 32)                                                                                                                                                        |
| 27 | <i>Page 11</i>                  |                           |                                                                                                                                                                                                                                                                                     |
| 28 | <i>Line 10</i>                  |                           |                                                                                                                                                                                                                                                                                     |
| 29 |                                 |                           |                                                                                                                                                                                                                                                                                     |
| 30 |                                 | 26b                       | Additional consent provisions for collection and use of participant data and biological specimens in ancillary studies, if applicable                                                                                                                                               |
| 31 |                                 |                           |                                                                                                                                                                                                                                                                                     |
| 32 |                                 |                           |                                                                                                                                                                                                                                                                                     |
| 33 | Confidentiality                 | 27                        | How personal information about potential and enrolled participants will be collected, shared, and maintained in order to protect confidentiality before, during, and after the trial                                                                                                |
| 34 | <i>Page 17</i>                  |                           |                                                                                                                                                                                                                                                                                     |
| 35 | <i>Line 24</i>                  |                           |                                                                                                                                                                                                                                                                                     |
| 36 |                                 |                           |                                                                                                                                                                                                                                                                                     |
| 37 | Declaration of interests        | 28                        | Financial and other competing interests for principal investigators for the overall trial and each study site                                                                                                                                                                       |
| 38 | <i>Page 2 line 7</i>            |                           |                                                                                                                                                                                                                                                                                     |
| 39 | Access to data                  | 29                        | Statement of who will have access to the final trial dataset, and disclosure of contractual agreements that limit such access for investigators                                                                                                                                     |
| 40 | <i>Page 3 line 16</i>           |                           |                                                                                                                                                                                                                                                                                     |
| 41 |                                 |                           |                                                                                                                                                                                                                                                                                     |
| 42 |                                 |                           |                                                                                                                                                                                                                                                                                     |
| 43 |                                 |                           |                                                                                                                                                                                                                                                                                     |
| 44 |                                 |                           |                                                                                                                                                                                                                                                                                     |
| 45 | Ancillary and post-trial care   | 30                        | Provisions, if any, for ancillary and post-trial care, and for compensation to those who suffer harm from trial participation                                                                                                                                                       |
| 46 | <i>with</i>                     |                           |                                                                                                                                                                                                                                                                                     |
| 47 |                                 |                           |                                                                                                                                                                                                                                                                                     |
| 48 | Dissemination policy            | 31a                       | Plans for investigators and sponsor to communicate trial results to participants, healthcare professionals, the public, and other relevant groups (eg, via publication, reporting in results databases, or other data sharing arrangements), including any publication restrictions |
| 49 | <i>Page 21 line 2</i>           |                           |                                                                                                                                                                                                                                                                                     |
| 50 | <i>Page 18 line 6</i>           |                           |                                                                                                                                                                                                                                                                                     |
| 51 |                                 |                           |                                                                                                                                                                                                                                                                                     |
| 52 |                                 |                           |                                                                                                                                                                                                                                                                                     |
| 53 |                                 |                           |                                                                                                                                                                                                                                                                                     |
| 54 |                                 | 31b                       | Authorship eligibility guidelines and any intended use of professional writers                                                                                                                                                                                                      |
| 55 |                                 |                           |                                                                                                                                                                                                                                                                                     |
| 56 |                                 |                           |                                                                                                                                                                                                                                                                                     |
| 57 |                                 | 31c                       | Plans, if any, for granting public access to the full protocol, participant-level dataset, and statistical code                                                                                                                                                                     |
| 58 |                                 |                           |                                                                                                                                                                                                                                                                                     |
| 59 |                                 |                           |                                                                                                                                                                                                                                                                                     |
| 60 |                                 |                           |                                                                                                                                                                                                                                                                                     |

## Appendices

|                            |    |                                                                                                                                                                                                |
|----------------------------|----|------------------------------------------------------------------------------------------------------------------------------------------------------------------------------------------------|
| Informed consent materials | 32 | Model consent form and other related documentation given to participants and authorised surrogates                                                                                             |
| Biological specimens       | 33 | Plans for collection, laboratory evaluation, and storage of biological specimens for genetic or molecular analysis in the current trial and for future use in ancillary studies, if applicable |

---

\*It is strongly recommended that this checklist be read in conjunction with the SPIRIT 2013 Explanation & Elaboration for important clarification on the items. Amendments to the protocol should be tracked and dated. The SPIRIT checklist is copyrighted by the SPIRIT Group under the Creative Commons "[Attribution-NonCommercial-NoDerivs 3.0 Unported](https://creativecommons.org/licenses/by-nc-nd/3.0/)" license.

# BMJ Open

## Study protocol for the POPART study – Prophylactic Oropharyngeal surfactant for Preterm infants: A Randomised Trial

|                                 |                                                                                                                                                                                                                                                                                                                                                                                                                                                                                                                                                                                                                                                                                                        |
|---------------------------------|--------------------------------------------------------------------------------------------------------------------------------------------------------------------------------------------------------------------------------------------------------------------------------------------------------------------------------------------------------------------------------------------------------------------------------------------------------------------------------------------------------------------------------------------------------------------------------------------------------------------------------------------------------------------------------------------------------|
| Journal:                        | <i>BMJ Open</i>                                                                                                                                                                                                                                                                                                                                                                                                                                                                                                                                                                                                                                                                                        |
| Manuscript ID                   | bmjopen-2019-035994.R2                                                                                                                                                                                                                                                                                                                                                                                                                                                                                                                                                                                                                                                                                 |
| Article Type:                   | Protocol                                                                                                                                                                                                                                                                                                                                                                                                                                                                                                                                                                                                                                                                                               |
| Date Submitted by the Author:   | 07-Apr-2020                                                                                                                                                                                                                                                                                                                                                                                                                                                                                                                                                                                                                                                                                            |
| Complete List of Authors:       | murphy, madeleine; National Maternity Hospital, Neonatology; National Children's Research Centre, National Children's Research Centre, Our Lady's Children's Hospital<br>Galligan, Marie; University College Dublin School of Medicine and Medical Science, School of Medicine<br>Molloy, Brenda; University College Dublin School of Medicine and Medical Science, School of Medicine<br>Hussain, Rabia; University College Dublin School of Medicine and Medical Science, School of Medicine<br>Doran, Peter; University College Dublin School of Medicine and Medical Science, School of Medicine<br>ODonnell, Colm; The National Maternity Hospital, Dublin, Ireland, Neonatal Intensive Care Unit |
| <b>Primary Subject Heading</b>: | Paediatrics                                                                                                                                                                                                                                                                                                                                                                                                                                                                                                                                                                                                                                                                                            |
| Secondary Subject Heading:      | Research methods, Paediatrics                                                                                                                                                                                                                                                                                                                                                                                                                                                                                                                                                                                                                                                                          |
| Keywords:                       | NEONATOLOGY, PAEDIATRICS, PERINATOLOGY                                                                                                                                                                                                                                                                                                                                                                                                                                                                                                                                                                                                                                                                 |
|                                 |                                                                                                                                                                                                                                                                                                                                                                                                                                                                                                                                                                                                                                                                                                        |

SCHOLARONE™  
Manuscripts

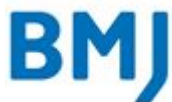

I, the Submitting Author has the right to grant and does grant on behalf of all authors of the Work (as defined in the below author licence), an exclusive licence and/or a non-exclusive licence for contributions from authors who are: i) UK Crown employees; ii) where BMJ has agreed a CC-BY licence shall apply, and/or iii) in accordance with the terms applicable for US Federal Government officers or employees acting as part of their official duties; on a worldwide, perpetual, irrevocable, royalty-free basis to BMJ Publishing Group Ltd ("BMJ") its licensees and where the relevant Journal is co-owned by BMJ to the co-owners of the Journal, to publish the Work in this journal and any other BMJ products and to exploit all rights, as set out in our [licence](#).

The Submitting Author accepts and understands that any supply made under these terms is made by BMJ to the Submitting Author unless you are acting as an employee on behalf of your employer or a postgraduate student of an affiliated institution which is paying any applicable article publishing charge ("APC") for Open Access articles. Where the Submitting Author wishes to make the Work available on an Open Access basis (and intends to pay the relevant APC), the terms of reuse of such Open Access shall be governed by a Creative Commons licence – details of these licences and which [Creative Commons](#) licence will apply to this Work are set out in our licence referred to above.

Other than as permitted in any relevant BMJ Author's Self Archiving Policies, I confirm this Work has not been accepted for publication elsewhere, is not being considered for publication elsewhere and does not duplicate material already published. I confirm all authors consent to publication of this Work and authorise the granting of this licence.

1  
2  
3 1 **Study protocol for the POPART study – Prophylactic Oropharyngeal surfactant for Preterm infants:**

4  
5 2 **A Randomised Trial**

6  
7 3

8  
9 4 Madeleine C. Murphy,<sup>1-3</sup> Marie Galligan,<sup>3</sup> Brenda Molloy,<sup>3</sup> Rabia Hussain,<sup>3</sup> Peter Doran,<sup>3</sup> Colm P.F.

10  
11 5 O'Donnell<sup>1-3</sup>

12  
13 6 1. National Maternity Hospital, Dublin, Ireland

14  
15 7 2. National Children's Research Centre, Dublin, Ireland

16  
17 8 3. School of Medicine, University College Dublin, Ireland

18  
19 9

20  
21 10 Word count 4308

Abstract 318

Figures/Tables 4

References 55

22  
23 11

24  
25 12 **Trial registration**

26  
27 13 Protocol identification (code or reference number): UCDCRC/16/003

28  
29 14 EudraCT number: 2016-004198-41

30  
31 15 Protocol version 2.0, dated 19.07.19

32  
33 16

34  
35 17 **Trial sponsor**

36  
37 18 University College Dublin

38  
39 19

40  
41 20 **Corresponding Author**

42  
43 21 Address Prof. Colm O'Donnell, Department of Neonatology, National Maternity Hospital,  
44  
45 22 Holles Street, Dublin 2, Ireland

46  
47 23 Tel +353 1 6373100

48  
49 24 Email [codonnell@nmh.ie](mailto:codonnell@nmh.ie)

50  
51 25

52  
53 26 **Key words:** Infant, newborn; oropharyngeal surfactant; respiratory distress syndrome; intubation;

54  
55 27 randomised controlled trial

1  
2  
3 1 **Author Contributions:** COD conceived and designed the trial protocol, co-wrote the first draft and  
4  
5 2 revised the manuscript for intellectual content. MCM helped design the trial protocol, co-wrote the  
6  
7 3 first draft and revised the manuscript for intellectual content. MG, BM, RH, and PD helped design  
8  
9 4 the trial protocol and revised the manuscript for intellectual content. MG designed the statistical  
10  
11 5 analysis plan. All authors approved the final manuscript prior to submission.  
12  
13  
14 6

15  
16  
17 7 **Funding:**

18  
19 8 Chiesi Farmaceutici, manufacturers of poractant alfa (Curosurf), supply the study drug free of  
20  
21 9 charge; they had no role in study design; have no role in study conduct; and will have no role in data  
22  
23 10 collection, analysis or interpretation. Further, they will have no role in the decision to present,  
24  
25 11 publish or otherwise report results.  
26

27  
28 12 Madeleine Murphy is the recipient of a Clinical Research Fellowship by the National Children's  
29  
30 13 Research Centre, Dublin (R17637)  
31  
32 14 Pediatric Clinical Research Infrastructure Network (PedCRIN), a Project of the European Union  
33  
34 15 Horizon 2020 programme designed to support the extension of clinical drug trials in children  
35  
36 16 throughout Europe, also support the study.  
37  
38  
39 17

40  
41 18 **Competing interests:** None declared  
42  
43  
44 19

45  
46 20 **Ethics approval:**

47  
48 21 Ireland: Research Ethics Committee, The National Maternity Hospital, Dublin, Ireland; Research  
49  
50 22 Ethics Committee, Coombe Women and Infants University Hospital  
51  
52 23 Belgium: Le Comité d'Ethique du CHR Citadelle  
53  
54 24 Czech Republic: Etická komise, Všeobecné fakultní nemocnice (VFN) v Praze (Ethics Committee of  
55  
56 25 the General University Hospital, Prague)  
57  
58  
59  
60

- 1  
2  
3 1 Norway: Regional komité for medisinsk og helsefaglig forskningsetikk (REK nord) (Regional Ethics  
4  
5 2 Committee, REK, nord)  
6  
7 3 Portugal: Comissão de Ética para a Investigação Clínica, CEIC (National Ethics Committee for Clinical  
8  
9 4 Research)  
10  
11  
12 5 Sweden: Stockholm Regional Ethics Review Board  
13  
14 6

15 7 **Acknowledgements:** We would like to acknowledge the administrative staff at UCD for their advice,  
16  
17 8 and support with the trial thus far. We wish to thank the members of PedCRIN and the Principal  
18  
19 9 Investigators and members of the Clinical Trials Units at all our European sites for facilitating  
20  
21 10 extension of our trial to Europe. POPART Trial Investigators: Jan Miletin, Coombe Women and  
22  
23 11 Infants University Hospital, Dublin, Ireland; Claus Klingenberg, University Northern Norway, Tromsø,  
24  
25 12 Norway; Hans Jørgen Guthe, Haukeland University Hospital, Bergen, Norway; Richard Plavka, Charles  
26  
27 13 University, Prague, Czech Republic; Tomas Juren, University Hospital Brno, Brno, Czech Republic;  
28  
29 14 Vincent Rigo, Le Centre Hospitalier Universitaire, Liege, Belgium; Kajsa Bohlin, Karolinska Institutet,  
30  
31 15 Stockholm, Sweden; and Almerinda Pereira, Hospital de Braga, Braga, Portugal.  
32  
33  
34

35 16 **Data statement:** Members of the Trial Steering Committee will have access to the final dataset. Data  
36  
37 17 will be available on request.  
38  
39  
40  
41  
42  
43  
44  
45  
46  
47  
48  
49  
50  
51  
52  
53  
54  
55  
56  
57  
58  
59  
60



1  
2  
3 1 Abstract  
4

5 2  
6

7 3 Introduction: Many preterm infants develop respiratory distress syndrome (RDS), a condition  
8  
9 4 characterised by a relative lack of surfactant. Endotracheal surfactant therapy revolutionised the  
10  
11 5 care of preterm infants in the 1990s. However, supporting newborns with RDS with continuous  
12  
13 6 positive airway pressure (CPAP) and reserving endotracheal surfactant for those who develop  
14  
15 7 respiratory failure despite CPAP yields better results than intubating all infants for surfactant. Half of  
16  
17 8 preterm infants born before 29 weeks' gestation initially managed with CPAP are intubated for  
18  
19 9 surfactant. Intubation is difficult to learn and associated with adverse effects. Surfactant  
20  
21 10 administration into the oropharynx has been reported in preterm animals and humans and may be  
22  
23 11 effective. We wished to determine whether giving oropharyngeal surfactant at birth reduces the  
24  
25 12 rate of endotracheal intubation for respiratory failure in preterm infants within 120 hours of birth.  
26  
27 13

28  
29  
30  
31  
32 14 Methods and analysis: POPART (Prophylactic Oropharyngeal surfactant for Preterm infants: A  
33  
34 15 Randomised Trial) is an investigator-led, unblinded, multicentre, randomised, parallel group,  
35  
36 16 controlled trial. Infants are eligible if born at a participating centre before 29 weeks gestational age  
37  
38 17 (GA) and there is a plan to offer intensive care. Infants are excluded if they have major congenital  
39  
40 18 anomalies. Infants are randomised at birth to treatment with oropharyngeal surfactant [120mg vial  
41  
42 19 <26 weeks GA stratum; 240mg vial 26 – 28+6 weeks GA stratum] in addition to CPAP or CPAP alone.  
43  
44 20 The primary outcome is intubation within 120 hours of birth, for bradycardia and/or apnoea despite  
45  
46 21 respiratory support in the delivery room or respiratory failure in the intensive care unit. Secondary  
47  
48 22 outcomes include incidence of mechanical ventilation, endotracheal surfactant use, chronic lung  
49  
50 23 disease, and death before hospital discharge.  
51  
52  
53  
54  
55

56  
57 24  
58 25 Ethics and dissemination: Approval for the study has been granted by the Research Ethics  
59  
60 26 Committees at the National Maternity Hospital, Dublin, Ireland (EC31.2016), and at each

1  
2  
3 1 participating site. The trial is being conducted at 9 centres in 6 European countries. The study results  
4  
5 2 will be submitted for publication in a peer-reviewed journal.  
6  
7  
8 3  
9  
10 4  
11  
12 5  
13  
14 6  
15  
16 7  
17  
18 8  
19  
20 9  
21  
22 10  
23  
24 11  
25  
26 12  
27  
28 13  
29  
30 14  
31  
32 15  
33  
34 16  
35  
36 17  
37  
38 18  
39  
40 19  
41  
42 20  
43  
44 21  
45  
46 22  
47  
48 23  
49  
50 24  
51  
52 25  
53  
54 26  
55  
56  
57  
58  
59  
60

For peer review only

1  
2  
3 1 Article summary  
4

5 2  
6

7 3 Strengths and limitations of this study  
8

9 4

10 5 • This is the first randomised study to specifically examine the efficacy of giving oropharyngeal  
11 6 surfactant at birth to preterm infants at high risk of developing respiratory distress  
12 7 syndrome.  
13 8

14 9

15 10 • We are enrolling infants < 29 weeks' gestation, including infants at 23 and 24 weeks'  
16 11 gestation, who are most at risk of respiratory distress syndrome.  
17 12

18 13

19 14 • We were unable to credibly mask the intervention.  
20 15

21 16

22 17 • To reduce the risk of bias we used objective criteria for our primary outcome i.e. intubation  
23 18 within 120 hours of life.  
24 19

25 20

26 21 • The multicentre nature of this study will increase the generalisability of its findings.  
27 22

28 23

29 24

30 25

31 26

32 27

33 28

34 29

35 30

36 31

37 32

38 33

39 34

40 35

41 36

42 37

43 38

44 39

45 40

46 41

47 42

48 43

49 44

50 45

51 46

52 47

53 48

54 49

55 50

56 51

57 52

58 53

59 54

60 55

## 1 Background

2  
3  
4  
5  
6  
7  
8 Respiratory distress syndrome (RDS) is a lung condition of the preterm infant. The risk of RDS is  
9  
10 inversely related to gestational age (GA). Infants with RDS have structural and functional immaturity  
11  
12 of their lungs. They also have a relative lack of surfactant,<sup>1</sup> an endogenously produced substance  
13  
14 that enables alveoli to expand more easily to recruit and maintain gas within the lung.  
15  
16  
17  
18 Exogenous surfactant<sup>2,3</sup> is frequently used to treat newborns with RDS and has led to improved  
19  
20 outcomes for infants worldwide. Randomised controlled trials (RCTs) in the 1980s – 1990s<sup>4-7</sup>  
21  
22 demonstrated that surfactant, given by endotracheal tube (ETT), reduced mortality and air leak  
23  
24 among premature infants who were intubated for respiratory failure due to RDS. This led to the  
25  
26 widespread practice of intubating all extremely preterm infants for surfactant and ventilation  
27  
28 (“prophylactic surfactant”).<sup>5</sup> Prior to the introduction of surfactant into clinical practice, concerns  
29  
30 were raised that premature infants who were intubated for respiratory support had worse  
31  
32 respiratory outcomes than infants who were managed with the non-invasive respiratory support,  
33  
34 nasal continuous positive airway pressure (CPAP).<sup>8</sup> These concerns persisted after the widespread  
35  
36 introduction of surfactant.<sup>9</sup> Multicentre RCTs found that starting infants on CPAP may be beneficial  
37  
38 when compared with intubation and positive pressure ventilation (PPV); the studies reported  
39  
40 decreased duration of mechanical ventilation with potential benefits of reduction of death and or  
41  
42 bronchopulmonary dysplasia (BPD).<sup>10-12</sup> Managing premature newborns initially with CPAP and  
43  
44 reserving intubation, mechanical ventilation and surfactant for those infants with worsening  
45  
46 respiratory failure despite CPAP yields better results than intubating all infants for surfactant  
47  
48 administration.<sup>13</sup> About half of premature infants born before 29 weeks’ gestation initially managed  
49  
50 with CPAP for RDS are ultimately intubated for surfactant and ventilation.<sup>14</sup>  
51  
52  
53  
54  
55  
56  
57  
58  
59  
60

1  
2  
3 1 Intubation is a procedure that is difficult to learn and is associated with adverse effects, both short<sup>15-</sup>  
4  
5 2 <sup>19</sup> and longer-term.<sup>20-22</sup> This has led many clinicians to investigate alternative methods of surfactant  
6  
7 3 delivery.<sup>23</sup> Giving nebulised surfactant to spontaneously breathing infants has met with limited  
8  
9 4 success.<sup>24-27</sup> Progress has been slow due to the technical difficulties encountered in aerosolising such  
10  
11 5 large molecules, the expense of the equipment needed to do so and the cost of the large amount of  
12  
13 6 surfactant needed to form an aerosol. Interest has largely focussed on less-invasive methods of  
14  
15 7 surfactant administration.  
16  
17 8 Less invasive surfactant administration (LISA) techniques involve introducing either a feeding tube or  
18  
19 9 vascular catheter into the trachea of a spontaneously breathing infant at laryngoscopy.<sup>28-31</sup> LISA is  
20  
21 10 associated with lower rates of mechanical ventilation among preterm infants in randomised<sup>28 31</sup> and  
22  
23 11 observational studies.<sup>32</sup> Two year follow up outcomes for infants enrolled in the randomised trial  
24  
25 12 Avoid Mechanical Ventilation,<sup>28</sup> where infants were randomised to surfactant via LISA or to standard  
26  
27 13 care with CPAP and ET instillation of surfactant if necessary, are similar between groups.<sup>33</sup> The  
28  
29 14 procedure is becoming more widely used, but rates vary between countries.<sup>34-37</sup> Concerns regarding  
30  
31 15 the validity and risk of bias within studies, a lack of familiarity with the technique, and patient  
32  
33 16 discomfort have been reported as reasons for not using LISA.<sup>36</sup> Use of sedation and analgesia prior  
34  
35 17 to laryngoscopy is not standard for the LISA procedure,<sup>28</sup> and the short-term adverse effects of  
36  
37 18 laryngoscopy are not avoided. While meta-analyses report that the LISA technique is associated with  
38  
39 19 less death or BPD,<sup>38-40</sup> further RCTs are needed. The Optimist-A trial,<sup>41</sup> evaluating minimally invasive  
40  
41 20 surfactant therapy in preterm infants born between 25 – 28 weeks' gestation is ongoing.  
42  
43 21 The laryngeal mask airway, a supraglottic airway device, may be used as an interface to deliver  
44  
45 22 surfactant.<sup>42-45</sup> However there is currently no device available for use in very low birth weight  
46  
47 23 infants, who constitute the majority of infants diagnosed with RDS.  
48  
49 24  
50  
51 25 Direct administration of surfactant into the pharynx of human infants has been described in  
52  
53 26 randomised<sup>7</sup> and prospective cohort studies.<sup>46 47</sup> It is apparently effective and is an easier technique  
54  
55  
56  
57  
58  
59  
60

1 to perform than endotracheal intubation or passing a feeding tube or vascular catheter into the  
2 trachea. Advantages of pharyngeal surfactant use are that it is an easy and cheaper method of  
3 administering surfactant and likely causes less discomfort to infants as it avoids the use of a  
4 laryngoscope. Giving surfactant early, prior to ventilation, delivers surfactant to a fluid-filled lung,  
5 which is spread via a fluid-air interface when the infant starts breathing. Animal studies report that  
6 surfactant is distributed more uniformly,<sup>48</sup> and lung function and compliance is better<sup>49</sup> if surfactant  
7 is delivered prior to ventilation. If shown to be effective, it may reduce the adverse effects, and  
8 additional associated costs, of ventilation.

9  
10 A Cochrane review of pharyngeal surfactant<sup>50</sup> did not identify any eligible trials to assess whether  
11 pharyngeal installation of surfactant before the first breath prevented morbidity and mortality in  
12 infants at risk of RDS. The Ten Centre Study randomised 328 infants born between 25 – 29 weeks'  
13 gestation to artificial surfactant therapy or saline. For those randomised to surfactant therapy, the  
14 first dose was given via the oropharynx, with subsequent doses given via an ETT if the infant was  
15 intubated, however the outcomes of infants who received pharyngeal surfactant alone were not  
16 reported. Large well conducted RCTs are needed, due to the evidence from animal<sup>51 52</sup> and  
17 observational human studies<sup>46 47</sup> suggesting that pharyngeal surfactant administration is potentially  
18 safe, feasible, and may be effective.

## 20 Objective

21  
22 We are performing a study to establish whether giving preterm infants surfactant into their  
23 oropharynx at birth in addition to CPAP compared with CPAP alone reduces their need for  
24 subsequent intubation in the first 5 days of life.

## 26 Methods

1  
2  
3 1  
45 2 Trial design  
67 3  
8

9  
10 4 The POPART trial is an investigator-led, unblinded, multicentre, randomised parallel-group  
11  
12 5 controlled trial. It aims to determine whether administering oropharyngeal surfactant to premature  
13  
14 6 infants at birth in addition to CPAP compared to CPAP alone reduces the rate of intubation for  
15  
16 7 respiratory failure in the first 5 days of life. The trial will recruit 250 infants born <29 weeks GA at  
17  
18 8 participating centres. A schedule of events is seen in figure 1.  
19

20  
21 9  
2223 10 Setting  
2425 11  
26

27  
28 12 The trial is being conducted at 9 neonatal intensive care units (NICUs) in 6 European countries  
29  
30 13 [Ireland (National Maternity Hospital (NMH), Dublin; Coombe Women and Infants University  
31  
32 14 Hospital (CWIUH) Dublin); Norway (University Northern Norway, Tromsø; Haukeland University  
33  
34 15 Hospital, Bergen); Czech Republic (Charles University, Prague; University Hospital Brno, Brno),  
35  
36 16 Belgium (Le Centre Hospitalier Universitaire (CHU), Liege); Sweden (Karolinska Institutet,  
37  
38 17 Stockholm); and Portugal (Hospital de Braga, Braga).  
39

40  
41 18  
4243 19 Participants  
4445 20  
4647 21 Inclusion and exclusion criteria  
4849 22  
50

51  
52 23 Trial subjects are premature infants at risk of RDS. Infants born less than 29 weeks GA are included if  
53  
54 24 the treating physician plans to offer intensive care. Infants are excluded if they have major  
55  
56 25 congenital anomalies (including neural tube defects, major structural cardiac anomalies (excluding  
57  
58 26 patent ductus arteriosus, ventricular septal defect, atrioventricular septal defect), abdominal wall  
59  
60

1  
2  
3 1 defects, congenital diaphragmatic hernia and major dysmorphic features with an abnormal  
4  
5 2 karyotype) and if the treating physician does not plan to offer intensive care. If there is a known  
6  
7 3 anomaly prenatally, families are not approached for consent. In the event of a postnatal diagnosis of  
8  
9 4 the aforementioned conditions, these infants meet criteria for post-randomisation exclusion.  
10  
11 5 Written informed consent from parent/legal guardian(s) is obtained before delivery. Infants of  
12  
13 6 multiple gestation and of either sex are eligible to be enrolled.  
14  
15  
16  
17  
18

## 19 8 Screening and consent

20  
21 9  
22  
23 10 Prior to the delivery a member of the research team or other senior doctor approaches  
24  
25 11 parent(s)/guardian(s) of eligible infants to inform them about the study. The team member explains  
26  
27 12 the purpose and nature of the study and provides written information for the parent(s)/guardian(s)  
28  
29 13 to keep. If the local language is not their first language, they are offered the opportunity to have an  
30  
31 14 interpreter present while the study is explained. Written consent for enrolment of the infant in the  
32  
33 15 study is then sought. Parents are informed that they may withdraw their child from the study at any  
34  
35 16 time should they so wish; and that a decision not to consent to their infants' participation in the  
36  
37 17 study or to withdraw their infant from the study once enrolled does not affect their infant's access  
38  
39 18 to the best available treatment and care.  
40  
41  
42  
43  
44

## 45 20 Outcome measures

### 46 21 47 22 Primary outcome

48  
49  
50  
51  
52 23  
53  
54 24 The primary outcome is the incidence of endotracheal intubation for respiratory failure within 120  
55  
56 25 hours of birth. Enrolled infants are intubated for persistent apnoea and/or bradycardia (HR  
57  
58 26 <100bpm) in the delivery room (DR), or for respiratory failure in the NICU defined as  $\geq 2$  of:  
59  
60



- 1 - Clinical signs – worsening tachypnoea; grunting; subcostal, intercostal and/or sternal recession
- 2 - Acidosis – pH < 7.2 on 2 blood gases (arterial or capillary)  $\geq$  30 minutes apart
- 3 - Hypoxaemia – FiO<sub>2</sub> > 0.4 to keep oxygen saturation (SpO<sub>2</sub>)  $\geq$  90% for > 30 minutes
- 4 - Hypercarbia – PCO<sub>2</sub> > 9.0 kPa on 2 blood gases (arterial or capillary)  $\geq$  30 minutes apart
- 5 - Apnoea – recurrent apnoea treated with mask ventilation

The primary outcome is intubation within 120 hours of birth. For the purpose of the primary outcome, infants are recorded as ‘yes’ if they were intubated, briefly intubated for surfactant administration e.g. INSURE, and brief tracheal catheterisation for surfactant administration e.g. LISA technique.

We record the treatment plan at the time of intubation. We record whether there is a) a plan for intubation with endotracheal tube, surfactant administration, and continued ventilation; b) a plan for “INSURE” – intubation with ETT, surfactant administration, and immediate (<30 minute) extubation; c) a plan for surfactant administration using LISA technique – surfactant administration through a thin endotracheal catheter; or d) other

We acknowledge that not all infants achieving  $\geq$  2 of the intubation indicators may be intubated.

## Secondary outcomes

The secondary outcomes are as follows:

1. Intubation in the DR
2. Number of attempts taken to successfully intubate in the DR
3. Chest compressions in the DR

- 1
- 2
- 3 1 4. Adrenaline administration in the DR
- 4
- 5 2 5. Rectal temperature on admission to the NICU
- 6
- 7 3 6. NICU intubation
- 8
- 9
- 10 4 7. Surfactant use before death or hospital discharge
- 11
- 12 5 a. Number of doses, and total dose
- 13
- 14 6 b. Intra-tracheal surfactant received post-intervention
- 15
- 16 7 c. Doses of post-intervention surfactant
- 17
- 18
- 19 8 8. Respiratory distress syndrome
- 20
- 21 9 a. Clinical evidence and radiological evidence of respiratory distress at the time of first
- 22
- 23 10 intubation
- 24
- 25 11 9. Incidence of pneumothorax
- 26
- 27 12 a. Incidence of pneumothorax on chest x-ray
- 28
- 29 13 b. Pneumothorax treated with needle aspiration or chest drain insertion
- 30
- 31
- 32 14 10. Incidence of pulmonary haemorrhage
- 33
- 34 15 a. Clinical evidence of pulmonary haemorrhage
- 35
- 36
- 37 16 11. Mechanical ventilation
- 38
- 39 17 12. Days of mechanical ventilation
- 40
- 41 18 13. Use of postnatal corticosteroids for ventilator dependence
- 42
- 43 19 14. Days of duration of respiratory support (endotracheal ventilation, high-frequency oscillatory
- 44
- 45 ventilation, CPAP, heated humidified high-flow nasal cannula O<sub>2</sub>, low flow nasal cannula O<sub>2</sub>)
- 46
- 47 20
- 48 21 15. BPD – supplemental O<sub>2</sub> at 28 days of life
- 49
- 50 22 16. Chronic lung disease of prematurity (CLD) –O<sub>2</sub> treatment at 36 weeks corrected GA; we are
- 51
- 52 23 also recording physiological BPD as determined by physiological oxygen reduction test
- 53
- 54 24 17. Medical treatment for a patent ductus arteriosus (PDA)
- 55
- 56 25 a. Administration of ibuprofen or paracetamol for PDA
- 57
- 58
- 59 26 18. Surgical treatment for a PDA
- 60

- 1
- 2
- 3 1 19. Proven necrotising enterocolitis ( $\geq$  Bell's stage 2)
- 4
- 5 2 20. Incidence of Intraventricular haemorrhage (IVH) (any and severe: IVH grade  $\geq$  3)
- 6
- 7 a. Evidence on surveillance cranial ultrasounds performed as standard of care
- 8 3
- 9
- 10 4 21. Incidence of cystic periventricular leukomalacia
- 11
- 12 a. Evidence on surveillance cranial ultrasounds performed as standard of care
- 13 5
- 14 6 22. Retinopathy of prematurity treated with laser photocoagulation or intravitreal injections
- 15
- 16 a. Evidence on surveillance ophthalmology review performed as standard of care
- 17 7
- 18
- 19 8 23. Death before hospital discharge
- 20
- 21 9 24. Survival without BPD at hospital discharge
- 22
- 23 10 25. Survival without CLD at hospital discharge
- 24
- 25 11 26. Duration of first hospitalisation
- 26
- 27 12 27. Use of home oxygen therapy
- 28
- 29 a. Discharged home on oxygen therapy
- 30 13
- 31
- 32 14
- 33
- 34 15 Investigational medicinal product (IMP)
- 35
- 36 16
- 37
- 38
- 39 17 Poractant alfa (Curosurf, Chiesi Farmaceutici, Parma, Italy) is a natural surfactant prepared from
- 40
- 41 18 porcine lungs. It is licensed for ET use and administration via thin catheter for the prevention and
- 42
- 43 19 treatment of RDS in preterm infants. The dosing recommendations for treatment with Curosurf
- 44
- 45 20 when given by ETT are 200mg/kg for established RDS and 100 – 200mg/kg for prophylaxis. Further
- 46
- 47 21 doses of 100mg/kg Curosurf may be given to infants who have persistent respiratory distress despite
- 48
- 49 22 treatment with surfactant (maximum recommended dose 400mg/kg). It is currently not licensed for
- 50
- 51 23 oropharyngeal administration, and therefore this study is examining the off-label use of a licensed
- 52
- 53 24 product. The timing or dosage of ET surfactant is not be affected by oropharyngeal surfactant. If an
- 54
- 55 25 infant is felt to need ET surfactant following initial oropharyngeal administration, then they receive
- 56
- 57
- 58
- 59
- 60

1  
2  
3 1 the standard initial dose via ETT. Additional doses are given at the discretion of the attending  
4  
5 2 physician.  
6  
7  
8 3  
9

#### 10 4 Randomisation

11 5  
12  
13 6 Infants are randomised (1:1) to receive oropharyngeal surfactant in addition to CPAP or CPAP alone  
14  
15 7 using variable block randomisation, with block sizes of 4, 6 and 8. Randomisation is stratified by  
16  
17 8 participating centre and GA (<26 weeks and 26-28<sup>+6</sup> weeks inclusive). Infants of multiple gestations  
18  
19 9 are randomised as individuals.  
20  
21  
22

23 10

24  
25 11 A computer-generated randomisation schedule using sequential 6-digit randomisation codes was  
26  
27 12 prepared by an independent statistician who was not be involved with subsequent data analysis or  
28  
29 13 interpretation and stored securely on a password-protected computer. Each participating centre is  
30  
31 14 provided with two separate boxes for the two GA strata with consecutively numbered, sealed  
32  
33 15 opaque randomisation envelopes containing the assigned treatment allocation. The boxes  
34  
35 16 containing the envelopes are stored securely in the NICU. An envelope from the appropriate box is  
36  
37 17 opened immediately before birth.  
38  
39  
40

41 18

#### 42 19 Blinding

43 20

44  
45  
46  
47 21 This is an open-label study. The study is not blinded to investigators, subjects, or medical or nursing  
48  
49 22 staff. We are not using a placebo, and in the event of the infant being randomised to the 'CONTROL'  
50  
51 23 arm, then they will be commenced on CPAP immediately after birth. The trial statistician will be  
52  
53 24 blinded for data analysis and will be kept unaware of treatment group assignments. We defined  
54  
55 25 objective criteria for the primary outcome to minimise potential bias.  
56  
57  
58  
59 26  
60

1  
2  
3 1 Intervention arm: Oropharyngeal surfactant  
4

5 2  
6

7 3 Infants randomised to oropharyngeal surfactant receive a dose of poractant alfa (Curosurf, Chiesi  
8

9 4 Farmaceutici, Parma, Italy) immediately after birth, ideally before the cord is clamped e.g. 60  
10

11 5 seconds, and are then commenced on CPAP as per routine practice. If it is given after the cord is  
12

13 6 clamped, it is given once the infant is placed on the resuscitaire. It is given within 5 minutes of birth  
14

15 7 in all cases. We are recording the timing of cord clamping for all patients.  
16

17 8  
18

19 9 The surfactant is warmed prior to being drawn up in a sterile syringe as per manufacturer's  
20

21 10 recommendation. Surfactant is administered by opening the mouth gently and giving the surfactant  
22

23 11 as a single bolus into the oropharynx using a thin flexible catheter attached to the syringe.  
24

25 12  
26

27 13 Infants are not weighed prior to enrolment. The 50<sup>th</sup> centile for birth weight (BW) for boys and girls  
28

29 14 according to GA is shown in table 1. In our study, infants < 26 weeks receive a full 120mg vial of  
30

31 15 Curosurf. We estimate that this provides dosing in the range as indicated in table 2. In our study,  
32

33 16 infants 26 – 28 weeks receive a full 240mg vial of Curosurf, and we estimate that this provides  
34

35 17 dosing in the range as indicated in table 3.  
36

37 18  
38

39 19 Control group: CPAP  
40

41 20  
42

43 21 Infants randomised to the control group do not have anything injected into their oropharynx and are  
44

45 22 stabilised on CPAP in the DR as per routine practice.  
46

47 23  
48

49 24 Clinical management  
50

51 25  
52

1  
2  
3 1 After the initial intervention, infants then receive standard care with CPAP, regardless of their group  
4  
5 2 assignment. DR care is carried out by the neonatal team who are trained in neonatal resuscitation as  
6  
7 3 per the recommendations of the International Liaison Committee on Resuscitation (ILCOR). Infants  
8  
9 4 in both groups are intubated in the DR for persistent apnoea and/or bradycardia despite PPV by  
10  
11 5 mask as per ILCOR recommendations. Infants are not intubated in the DR solely for surfactant  
12  
13 6 administration. All other aspects of neonatal intensive care is at the discretion of the treating  
14  
15 7 physicians. Infants in both groups are treated equally. The frequency of blood gas monitoring is  
16  
17 8 based on the decision of the treating physician. Enrolled infants are intubated if they reach the pre-  
18  
19 9 determined criteria for respiratory failure. After giving endotracheal surfactant for the treatment of  
20  
21 10 RDS, attending clinicians may attempt to extubate the babies immediately or they may elect to  
22  
23 11 ventilate the babies for a longer period at their discretion.  
24  
25  
26  
27  
28  
29  
30  
31

#### 32 14 Data management

33  
34  
35  
36  
37

38 16 Data is collected by the on-site investigators from the patient's clinical notes. This is recorded on a  
39  
40 17 data worksheet and transferred to an electronic Case Report Form (CRF) to be stored in a secure,  
41  
42 18 dedicated, password-protected electronic database. The clinical study monitor and representative of  
43  
44 19 the regulatory authority can directly access source documents for comparison of such data with the  
45  
46 20 data in the electronic CRFs and can verify that the study is carried out in compliance with the  
47  
48 21 protocol and local regulatory requirements.  
49  
50  
51

52 22 The investigators adheres to national and hospital protocols on data use and storage. Data is coded.  
53  
54 23 It is stored in a locked filing cabinet then uploaded onto a password-protected computer in a locked  
55  
56 24 office. Documents are stored safely in confidential conditions. On all study-specific documents other  
57  
58 25 than the signed consent, the subject is referred to by the study subject identification code.  
59  
60

1  
2  
3 1  
45 2 Description of statistical methods  
6  
7 3  
8  
910 4 Trial results will be reported according to the Consolidated Standards of Reporting Trials (CONSORT).  
11

12 5 The flow of patients through the trial will be represented on a CONSORT flow diagram, and the  
13  
14 6 number included in the primary and secondary analyses as well as all reasons for exclusions will be  
15  
16 7 reported per trial arm. Analysis of efficacy endpoints will be carried-out following the Intention-To-  
17  
18 8 Treat principle. A Per-Protocol analysis will also be carried out on the primary endpoint, excluding  
19  
20 9 infants with incomplete data on the primary outcome and infants with any major protocol  
21  
22 10 deviations.  
23  
24  
25  
26 11

27 12 Demographic and baseline data will be summarised by treatment group to evaluate comparability.  
28  
29 13

30 14 Primary outcome analysis  
31  
32  
33 15

34  
35  
36 16 The primary outcome will be summarised per group. Ratios of relative risk will be  
37  
38 17 reported with 95% confidence intervals. A two-sided, two-proportion Z test will be  
39  
40 18 carried out to investigate whether the rate of endotracheal intubation differs between  
41  
42 19 intervention and standard-of-care. This analysis will be carried out both on the  
43  
44 20 intention-to-treat set and on the per protocol set.  
45  
46  
47 21

48  
49 22 A competing risks model will be fitted to investigate the effect of the intervention on  
50  
51 23 the primary endpoint, adjusting for competing outcomes (e.g. mortality) that may  
52  
53 24 impact on observation of the primary endpoint.  
54  
55  
56 25

57  
58  
59  
60

1  
2  
3 1 The sensitivity of the estimated intervention effect to measured covariates of interest,  
4  
5 2 including centre, GA, birth weight, gender, mode of delivery and antenatal  
6  
7 3 corticosteroid treatment, will be evaluated with regression analysis.  
8  
9  
10 4

#### 11 5 Secondary outcome analysis

12 6 Categorical outcomes will be summarised per treatment group, with between-group differences  
13  
14 7 expressed as a relative risk with 95% confidence intervals. A two-sided, two-proportion Z test will be  
15  
16 8 carried out for each categorical outcome to investigate whether the proportion differs between  
17  
18 9 intervention and standard of care. For the important secondary endpoint of death before hospital  
19  
20 10 discharge, regression analysis will be employed to determine sensitivity of the estimated  
21  
22 11 intervention effect to potentially relevant covariates (as specified above for the primary outcome).  
23  
24  
25  
26  
27  
28  
29

30 13 Numeric secondary outcomes will be summarised by treatment group and between-group  
31  
32 14 differences will be presented with a 95% confidence interval. A superiority hypothesis test will be  
33  
34 15 carried out to test for a difference in the outcome between control and intervention, using a t-test  
35  
36 16 or a Mann-Whitney U test where relevant.  
37  
38  
39  
40

#### 41 18 Subgroup analyses

42  
43 19 Subgroups of interest include infants of different gestational age strata (e.g. less than 26 weeks, and  
44  
45 20 26-28 weeks' gestation at birth), and infants from different participating centres. Subgroup analysis  
46  
47 21 of the primary outcome and the important secondary outcome of death before hospital discharge  
48  
49 22 will be carried out by regression modelling to determine differences in the intervention effect for  
50  
51 23 infants of different GA strata, and infants from different participating centres.  
52  
53  
54  
55  
56

#### 57 25 Missing data

58  
59 26  
60



1  
2  
3 1 Any missing data or data anomalies will be communicated to the study site(s) for prompt  
4  
5 2 clarification and resolution. For outcomes missing more than 5% of data in either treatment group,  
6  
7 3 missing data methods will be employed in analysis. For categorical outcomes with censored data,  
8  
9 4 Kaplan-Meier analyses will be used to estimate treatment effect. For other missing data, a suitable  
10  
11 5 imputation method will be selected during blind review of the data.  
12  
13  
14 6

#### 16 7 Sample size and power

18 8  
19  
20 9 The sample size calculation assumed a rate of endotracheal intubation of 46% for infants treated  
21  
22 10 with CPAP alone, and a rate of 28% for infants receiving oropharyngeal surfactant and CPAP. The  
23  
24 11 former was informed by published RCTs showing a rate of mechanical ventilation in the days after  
25  
26 12 birth among preterm infants treated with CPAP alone from 40– 60%<sup>10-12</sup> and rates of CPAP failure of  
27  
28 13 43% reported in a cohort of preterm infants 25 – 28 weeks' gestation initially commenced on  
29  
30 14 CPAP.<sup>14</sup> The latter was informed by a cohort of infants born 26 – 28 weeks' gestation reporting that  
31  
32 15 minimally invasive surfactant techniques reduced the rate of mechanical ventilation to from 46% to  
33  
34 16 28%.<sup>28</sup> Sample size was calculated in G\*power based on a two-sided, two-proportion Z test. A  
35  
36 17 sample size of 125 infants per arm will be required to give a statistical power of 80% at a significance  
37  
38 18 level of 5%, adjusted for an anticipated death rate of 10% (estimated from local data (NMH,  
39  
40 19 Neonatal Clinical Report, 2015).  
41  
42  
43  
44  
45  
46  
47  
48  
49  
50  
51

#### 52 21 Safety analyses

53 22  
54 23 Adverse events following administration of oropharyngeal surfactant will be documented. Safety  
55  
56 24 analyses will be carried out on the Safety Set, defined as patients in the intervention arm who  
57  
58 25 received oropharyngeal surfactant and patients who received CPAP only. The frequency of adverse  
59  
60 26 events and the number and percentage of infants reported as having at least one emergent adverse

1 event, will be reported by system organ class and preferred term, by treatment received. The same  
2 description will be performed for serious adverse events (SAE), severe AE, AE treatment-related and  
3 AE leading to IMP withdrawal. Defined SAEs for the study are important medical events, and death  
4 before hospital discharge.

#### 6 Safety monitoring and interim analysis

8 A data safety monitoring board (DSMB) will be established to perform ongoing safety surveillance  
9 and to perform interim analyses on the study data. The DSMB will be an independent committee,  
10 composed of a minimum of three members; at least two will be clinicians with expertise in clinical  
11 trials; at least one member will be a clinician with expertise in neonatology. They will not be blinded  
12 to the intervention groups.

14 The DSMB will meet on a 6-monthly basis after start of the trial and will review the frequency and  
15 severity of AEs in both treatment groups. If they observe any significant excess of SAEs in the  
16 intervention group associated with the intervention, they may recommend premature termination  
17 of the trial on the basis of safety concerns.

19 The DSMB will conduct interim analysis to determine whether the data provide overwhelming  
20 evidence of efficacy or futility, defined as a highly statistically significant difference in the primary  
21 outcome or a highly statistically significant difference in the important secondary outcome of death  
22 before hospital discharge. The type I error rate for interim analysis will be set to 0.001 in accordance  
23 with the Haybittle-Peto stopping boundary. For final analysis, the type I error rate will remain at  
24 0.05. Interim analysis will be carried out after approximately 50% of participants (n=126) have  
25 completed the study. The DSMB may recommend early termination of the trial due to efficacy or  
26 futility; or for unanticipated concerns for the safety of enrolled infants. Standard procedures for

1  
2  
3 1 reporting AEs will be used in accordance with Good Clinical Practice guidelines.  
4  
5

6 2 Ethics and dissemination  
7  
8  
9

10 3 The study was initially approved by the Research Ethics Committee at NMH, Dublin, and the Health  
11  
12 4 Products Regulatory Authority of Ireland. Approval was also obtained at the research ethics  
13  
14 5 committees at each participating site and at the relevant competent authority for each participating  
15  
16 6 country. All bodies are informed in writing of any substantial changes to the protocol, prior to any  
17  
18 7 such changes being implemented. University College Dublin, Ireland is the sponsor for this study.  
19  
20  
21

22 8  
23

24 9 Patient and public involvement (PPI)  
25  
26  
27

28 10

29 11 We liaised with the Irish Neonatal Health Alliance for assistance when designing the parent  
30  
31 12 information leaflet and consent form. Parent focus groups were held via Pediatric Clinical Research  
32  
33 13 Infrastructure Network (PedCRIN) prior to expansion of the study to European sites.  
34  
35

36 14

37 15 Recruitment  
38  
39  
40

41 16

42 17 The National Maternity Hospital is a stand-alone university maternity hospital with a tertiary NICU to  
43  
44 18 which >150 infants <1500g are admitted annually. Approximately 60 babies <29 weeks' gestation are  
45  
46 19 admitted annually. Though the enrolment rates to our studies amongst eligible infants are  
47  
48 20 consistently excellent (> 80%), we believe it is necessary to enrol infants at multiple sites in order to  
49  
50 21 enrol our planned target sample of 250 infants in a timely fashion. We have a track record enlisting  
51  
52 22 the help of collaborators nationally<sup>53</sup> and internationally<sup>54 55</sup> to perform our studies. We believe that  
53  
54 23 with their help, we can enrol these infants in 3 years.  
55  
56  
57

58 24

59 25 Current status  
60

1  
2  
3 1  
4  
5  
6 2

The trial began recruitment in December 2017, with additional sites joining subsequently. It is currently recruiting in 9 centres in 6 European countries. It is expected that recruitment for the study will be completed by December 2020.

7  
8  
9  
10 4  
11  
12 5  
13  
14 6

## Publication of results

15  
16  
17  
18 7

The authors intend to publish the results of this trial in a high-quality, peer-reviewed journal upon completion of data collection and analysis.

19  
20 8  
21  
22  
23 9

## Discussion

24  
25  
26 10  
27  
28 11

Oropharyngeal surfactant given immediately after birth to preterm infants at risk of RDS has the potential to reduce the risk of intubation and ventilation. Endotracheal intubation is invasive and unpleasant for newborns that is associated with adverse short- and long-term effects. It is also a skill that is difficult for clinicians to learn and maintain. In contrast, giving surfactant into the oropharynx is easy and avoids the adverse effects associated with intubation. There is evidence from animal studies and from case series in humans that it may be effective. This is an attractive proposition, because it could avoid harms associated with intubation for babies and raises the possibility of giving surfactant in contexts where it is not currently feasible (e.g. non-tertiary settings, developing countries). We were unable to credibly mask the intervention and acknowledge this lack of blinding as a limitation of the study. We tried to minimise potential bias by setting predefined objective treatment failure criteria, which were agreed on by all participating sites.

29  
30  
31  
32  
33  
34  
35  
36  
37  
38  
39  
40  
41  
42  
43  
44  
45  
46  
47  
48  
49  
50  
51  
52  
53  
54  
55  
56  
57  
58  
59  
60

22

23

24

25

1  
2  
3 1  
4  
5 2  
6  
7 3  
8  
9 4  
10  
11  
12 5  
13  
14 6  
15  
16 7  
17  
18  
19  
20  
21  
22  
23  
24  
25  
26  
27 8  
28  
29 9  
30  
31  
32  
33  
34  
35  
36 10  
37  
38  
39 11  
40  
41  
42  
43  
44  
45 12  
46  
47  
48 13  
49  
50 14  
51  
52 15  
53  
54 16  
55  
56 17  
57  
58 18  
59  
60

Figure 1. Schedule of events

Table 1. 50<sup>th</sup> centile for birth weight (BW) for boys and girls according to gestational age (GA)

| GA (weeks) | Girls BW (kg) | Boys BW (kg) |
|------------|---------------|--------------|
| 23         | 0.550         | 0.600        |
| 24         | 0.650         | 0.700        |
| 25         | 0.775         | 0.800        |
| 26         | 0.850         | 0.900        |
| 27         | 0.975         | 1.050        |
| 28         | 1.100         | 1.150        |

Table 2. Infants < 26 weeks estimated dosing range, following 120mg vial of Curosurf

| GA (weeks) | Girls BW (kg) | Dose (mg/kg) | Boys BW (kg) | Dose (mg/kg) |
|------------|---------------|--------------|--------------|--------------|
| 23         | 0.550         | 218          | 0.600        | 200          |
| 24         | 0.650         | 185          | 0.700        | 171          |
| 25         | 0.775         | 155          | 0.800        | 150          |

Table 3. Infants 26-28<sup>+6</sup> weeks estimating dosing range, following 240mg vial Curosurf

| GA (weeks) | Girls BW (kg) | Dose (mg/kg) | Boys BW (kg) | Dose (mg/kg) |
|------------|---------------|--------------|--------------|--------------|
| 26         | 0.850         | 282          | 0.900        | 267          |
| 27         | 0.975         | 246          | 1.050        | 229          |
| 28         | 1.100         | 218          | 1.150        | 209          |

## References:

1. Avery ME, Mead J. Surface properties in relation to atelectasis and hyaline membrane disease. *AMA J Dis Child* 1959;97(5, Part 1):517-23. [published Online First: 1959/05/01]
2. Fujiwara T MH, Chida S, Morita T, Watabe Y, Abe T. Artificial surfactant therapy in hyaline-membrane disease. *Lancet (London, England)* 1980;1(8159):55-59.
3. Halliday HL. Surfactants: past, present and future. *Journal of perinatology : official journal of the California Perinatal Association* 2008;28 Suppl 1:S47-56. doi: 10.1038/jp.2008.50 [published Online First: 2008/06/18]
4. Enhorning G, Shennan A, Possmayer F, et al. Prevention of neonatal respiratory distress syndrome by tracheal instillation of surfactant: a randomized clinical trial. *Pediatrics* 1985;76(2):145-53. [published Online First: 1985/08/01]
5. Merritt TA, Hallman M, Bloom BT, et al. Prophylactic treatment of very premature infants with human surfactant. *The New England journal of medicine* 1986;315(13):785-90. doi: 10.1056/nejm198609253151301 [published Online First: 1986/09/25]
6. Hallman M, Merritt TA, Jarvenpaa AL, et al. Exogenous human surfactant for treatment of severe respiratory distress syndrome: a randomized prospective clinical trial. *J Pediatr* 1985;106(6):963-9. [published Online First: 1985/06/01]
7. Ten centre trial of artificial surfactant (artificial lung expanding compound) in very premature babies. Ten Centre Study Group. *British medical journal (Clinical research ed)* 1987;294(6578):991-6. [published Online First: 1987/04/18]
8. Avery ME, Tooley WH, Keller JB, et al. Is chronic lung disease in low birth weight infants preventable? A survey of eight centers. *Pediatrics* 1987;79(1):26-30. [published Online First: 1987/01/01]
9. Van Marter LJ, Allred EN, Pagano M, et al. Do clinical markers of barotrauma and oxygen toxicity explain interhospital variation in rates of chronic lung disease? The Neonatology Committee for the Developmental Network. *Pediatrics* 2000;105(6):1194-201. doi: 10.1542/peds.105.6.1194 [published Online First: 2000/06/02]
10. Morley CJ, Davis PG, Doyle LW, et al. Nasal CPAP or intubation at birth for very preterm infants. *The New England journal of medicine* 2008;358(7):700-8. doi: 10.1056/NEJMoa072788 [published Online First: 2008/02/15]
11. Finer NN, Carlo WA, Walsh MC, et al. Early CPAP versus surfactant in extremely preterm infants. *The New England journal of medicine* 2010;362(21):1970-9. doi: 10.1056/NEJMoa0911783 [published Online First: 2010/05/18]
12. Dunn MS, Kaempf J, de Klerk A, et al. Randomized trial comparing 3 approaches to the initial respiratory management of preterm neonates. *Pediatrics* 2011;128(5):e1069-76. doi: 10.1542/peds.2010-3848 [published Online First: 2011/10/26]

13. Rojas-Reyes MX, Morley CJ, Soll R. Prophylactic versus selective use of surfactant in preventing morbidity and mortality in preterm infants. *The Cochrane database of systematic reviews* 2012(3):Cd000510. doi: 10.1002/14651858.CD000510.pub2 [published Online First: 2012/03/16]
14. Dargaville PA, Gerber A, Johansson S, et al. Incidence and Outcome of CPAP Failure in Preterm Infants. *Pediatrics* 2016;138(1) doi: 10.1542/peds.2015-3985 [published Online First: 2016/07/02]
15. Kelly MA, Finer NN. Nasotracheal intubation in the neonate: physiologic responses and effects of atropine and pancuronium. *The Journal of pediatrics* 1984;105(2):303-9. [published Online First: 1984/08/01]
16. Shangle CE, Haas RH, Vaida F, et al. Effects of endotracheal intubation and surfactant on a 3-channel neonatal electroencephalogram. *The Journal of pediatrics* 2012;161(2):252-7. doi: 10.1016/j.jpeds.2012.02.014 [published Online First: 2012/03/20]
17. Marshall TA, Deeder R, Pai S, et al. Physiologic changes associated with endotracheal intubation in preterm infants. *Critical care medicine* 1984;12(6):501-3. doi: 10.1097/00003246-198406000-00006 [published Online First: 1984/06/01]
18. Friesen RH, Honda AT, Thieme RE. Changes in anterior fontanel pressure in preterm neonates during tracheal intubation. *Anesthesia and analgesia* 1987;66(9):874-8. [published Online First: 1987/09/01]
19. Barrington KJ, Finer NN, Etches PC. Succinylcholine and atropine for premedication of the newborn infant before nasotracheal intubation: a randomized, controlled trial. *Critical care medicine* 1989;17(12):1293-6. doi: 10.1097/00003246-198912000-00009 [published Online First: 1989/12/01]
20. Parkin JL, Stevens MH, Jung AL. Acquired and congenital subglottic stenosis in the infant. *The Annals of otology, rhinology, and laryngology* 1976;85(5 Pt.1):573-81. doi: 10.1177/000348947608500503 [published Online First: 1976/09/01]
21. Jobe AH IM. Lung development and function in preterm infants in the surfactant treatment era. *Annu Rev Physiol* 2000;62(825-46)
22. Bjorklund LJ IJ, Curstedt T, John J, Robertson B, Werner O, Vilstrup CT. Manual ventilation with a few large breaths at birth compromises the therapeutic effect of subsequent surfactant replacement in immature lambs. *Pediatr Res* 1997;42(3):348-55.
23. More K, Sakhuja P, Shah PS. Minimally invasive surfactant administration in preterm infants: a meta-narrative review. *JAMA pediatrics* 2014;168(10):901-8. doi: 10.1001/jamapediatrics.2014.1148 [published Online First: 2014/08/05]
24. Berggren E, Liljedahl M, Winbladh B, et al. Pilot study of nebulized surfactant therapy for neonatal respiratory distress syndrome. *Acta paediatrica (Oslo, Norway : 1992)* 2000;89(4):460-4. [published Online First: 2000/06/01]
25. Finer NN MT, Bernstein G, Job L, Mazela J, Segal R. An open label, pilot study of Aerosurf combined with nCPAP to prevent RDS in preterm neonates. *J Aerosol Med Pulm Drug Deliv* 2010;23(5):303-09.
26. Minocchieri S, Berry CA, Pillow JJ. Nebulised surfactant to reduce severity of respiratory distress: a blinded, parallel, randomised controlled trial. *Archives of disease in childhood Fetal and neonatal edition* 2019;104(3):F313-f19. doi: 10.1136/archdischild-2018-315051 [published Online First: 2018/07/28]

- 1  
2  
3 1 27. Abdel-Latif ME, Osborn DA. Nebulised surfactant in preterm infants with or at risk of  
4 2 respiratory distress syndrome. *The Cochrane database of systematic reviews*  
5 3 2012;10:Cd008310. doi: 10.1002/14651858.CD008310.pub2 [published Online First:  
6 4 2012/10/19]
- 8 5 28. Gopel W, Kribs A, Ziegler A, et al. Avoidance of mechanical ventilation by surfactant  
9 6 treatment of spontaneously breathing preterm infants (AMV): an open-label,  
10 7 randomised, controlled trial. *Lancet (London, England)* 2011;378(9803):1627-34. doi:  
11 8 10.1016/s0140-6736(11)60986-0 [published Online First: 2011/10/04]
- 13 9 29. Dargaville PA, Aiyappan A, De Paoli AG, et al. Minimally-invasive surfactant therapy in  
14 10 preterm infants on continuous positive airway pressure. *Archives of disease in*  
15 11 *childhood Fetal and neonatal edition* 2013;98(2):F122-6. doi: 10.1136/archdischild-  
16 12 2011-301314 [published Online First: 2012/06/12]
- 18 13 30. Kanmaz HG, Erdeve O, Canpolat FE, et al. Surfactant administration via thin catheter  
19 14 during spontaneous breathing: randomized controlled trial. *Pediatrics*  
20 15 2013;131(2):e502-9. doi: 10.1542/peds.2012-0603 [published Online First:  
21 16 2013/01/30]
- 23 17 31. Kribs A, Roll C, Gopel W, et al. Nonintubated Surfactant Application vs Conventional  
24 18 Therapy in Extremely Preterm Infants: A Randomized Clinical Trial. *JAMA pediatrics*  
25 19 2015;169(8):723-30. doi: 10.1001/jamapediatrics.2015.0504 [published Online First:  
26 20 2015/06/09]
- 28 21 32. Gopel W, Kribs A, Hartel C, et al. Less invasive surfactant administration is associated  
29 22 with improved pulmonary outcomes in spontaneously breathing preterm infants.  
30 23 *Acta paediatrica (Oslo, Norway : 1992)* 2015;104(3):241-6. doi: 10.1111/apa.12883  
31 24 [published Online First: 2014/12/05]
- 33 25 33. Herting E, Kribs A, Hartel C, et al. Two-year outcome data suggest that less invasive  
34 26 surfactant administration (LISA) is safe. Results from the follow-up of the  
35 27 randomized controlled AMV (avoid mechanical ventilation) study. *European journal*  
36 28 *of pediatrics* 2020 doi: 10.1007/s00431-020-03572-0 [published Online First:  
37 29 2020/02/19]
- 39 30 34. Klotz D, Porcaro U, Fleck T, et al. European perspective on less invasive surfactant  
40 31 administration-a survey. *European journal of pediatrics* 2017;176(2):147-54. doi:  
41 32 10.1007/s00431-016-2812-9 [published Online First: 2016/12/13]
- 43 33 35. Beltempo M, Isayama T, Vento M, et al. Respiratory Management of Extremely Preterm  
44 34 Infants: An International Survey. *Neonatology* 2018;114(1):28-36. doi:  
45 35 10.1159/000487987 [published Online First: 2018/04/16]
- 46 36 36. Heiring C, Jonsson B, Andersson S, et al. Survey shows large differences between the  
47 37 Nordic countries in the use of less invasive surfactant administration. *Acta*  
48 38 *paediatrica (Oslo, Norway : 1992)* 2017;106(3):382-86. doi: 10.1111/apa.13694  
49 39 [published Online First: 2016/12/20]
- 51 40 37. Kurepa D, Perveen S, Lipener Y, et al. The use of less invasive surfactant administration  
52 41 (LISA) in the United States with review of the literature. *Journal of perinatology :*  
53 42 *official journal of the California Perinatal Association* 2019;39(3):426-32. doi:  
54 43 10.1038/s41372-018-0302-9 [published Online First: 2019/01/13]
- 56 44 38. Rigo V, Lefebvre C, Broux I. Surfactant instillation in spontaneously breathing preterm  
57 45 infants: a systematic review and meta-analysis. *European journal of pediatrics*  
58 46 2016;175(12):1933-42. doi: 10.1007/s00431-016-2789-4 [published Online First:  
59 47 2016/09/30]
- 60



- 1  
2  
3 1 39. Isayama T, Iwami H, McDonald S, et al. Association of Noninvasive Ventilation Strategies  
4 2 With Mortality and Bronchopulmonary Dysplasia Among Preterm Infants: A  
5 3 Systematic Review and Meta-analysis. *Jama* 2016;316(6):611-24. doi:  
6 4 10.1001/jama.2016.10708 [published Online First: 2016/08/18]  
7 5  
8 6 40. Aldana-Aguirre JC, Pinto M, Featherstone RM, et al. Less invasive surfactant  
9 7 administration versus intubation for surfactant delivery in preterm infants with  
10 8 respiratory distress syndrome: a systematic review and meta-analysis. *Archives of*  
11 9 *disease in childhood Fetal and neonatal edition* 2017;102(1):F17-f23. doi:  
12 10 10.1136/archdischild-2015-310299 [published Online First: 2016/11/18]  
13 11  
14 12 41. Dargaville PA, Kamlin CO, De Paoli AG, et al. The OPTIMIST-A trial: evaluation of  
15 13 minimally-invasive surfactant therapy in preterm infants 25-28 weeks gestation.  
16 14 *BMC pediatrics* 2014;14:213. doi: 10.1186/1471-2431-14-213 [published Online First:  
17 15 2014/08/29]  
18 16  
19 17 42. Attridge JT SC, Stukenborg GJ, Kattwinkel J. Administration of rescue surfactant by  
20 18 laryngeal mask airway: lessons from a pilot trial. *American journal of perinatology*  
21 19 2013;30(3):201-06.  
22 20  
23 21 43. Barbosa RF, Simoes ESAC, Silva YP. A randomized controlled trial of the laryngeal mask  
24 22 airway for surfactant administration in neonates. *Jornal de pediatria* 2017;93(4):343-  
25 23 50. doi: 10.1016/j.jpmed.2016.08.007 [published Online First: 2017/01/29]  
26 24  
27 25 44. Roberts KD, Brown R, Lampland AL, et al. Laryngeal Mask Airway for Surfactant  
28 26 Administration in Neonates: A Randomized, Controlled Trial. *The Journal of*  
29 27 *pediatrics* 2018;193:40-46.e1. doi: 10.1016/j.jpeds.2017.09.068 [published Online  
30 28 First: 2017/11/28]  
31 29  
32 30 45. Abdel-Latif ME, Osborn DA. Laryngeal mask airway surfactant administration for  
33 31 prevention of morbidity and mortality in preterm infants with or at risk of  
34 32 respiratory distress syndrome. *The Cochrane database of systematic reviews*  
35 33 2011(7):Cd008309. doi: 10.1002/14651858.CD008309.pub2 [published Online First:  
36 34 2011/07/08]  
37 35  
38 36 46. Kattwinkel J, Robinson M, Bloom BT, et al. Technique for intrapartum administration of  
39 37 surfactant without requirement for an endotracheal tube. *Journal of perinatology :*  
40 38 *official journal of the California Perinatal Association* 2004;24(6):360-5. doi:  
41 39 10.1038/sj.jp.7211103 [published Online First: 2004/04/16]  
42 40  
43 41 47. Lamberska T, Settlemayerova E, Smisek J, et al. Oropharyngeal surfactant can improve  
44 42 initial stabilisation and reduce rescue intubation in infants born below 25 weeks of  
45 43 gestation. *Acta paediatrica (Oslo, Norway : 1992)* 2018;107(1):73-78. doi:  
46 44 10.1111/apa.14060 [published Online First: 2017/09/06]  
47 45  
48 46 48. Jobe A, Ikegami M, Jacobs H, et al. Surfactant and pulmonary blood flow distributions  
49 47 following treatment of premature lambs with natural surfactant. *The Journal of*  
50 48 *clinical investigation* 1984;73(3):848-56. doi: 10.1172/jci111280 [published Online  
51 49 First: 1984/03/01]  
52 50  
53 51 49. Cummings JJ, Holm BA, Nickerson PA, et al. Pre- versus post-ventilatory surfactant  
54 52 treatment in surfactant-deficient preterm lambs. *Reproduction, fertility, and*  
55 53 *development* 1995;7(5):1333-8. [published Online First: 1995/01/01]  
56 54  
57 55 50. Abdel-Latif ME, Osborn DA. Pharyngeal instillation of surfactant before the first breath  
58 56 for prevention of morbidity and mortality in preterm infants at risk of respiratory  
59 57 distress syndrome. *The Cochrane database of systematic reviews* 2011(3):Cd008311.  
60 58 doi: 10.1002/14651858.CD008311.pub2 [published Online First: 2011/03/18]

- 1  
2  
3  
4 1 51. Enhorning G, Grossmann G, Robertson B. Pharyngeal deposition of surfactant in the  
5 2 premature rabbit fetus. *Biology of the neonate* 1973;22(1):126-32. [published Online  
6 3 First: 1973/01/01]  
7 4 52. Enhorning G, Robertson B, Milne E, et al. Radiologic evaluation of the premature  
8 5 newborn rabbit after pharyngeal deposition of surfactant. *American journal of  
9 6 obstetrics and gynecology* 1975;121(4):475-80. [published Online First: 1975/02/15]  
10 7 53. Kieran EA, O'Sullivan A, Miletin J, et al. 2% chlorhexidine-70% isopropyl alcohol versus  
11 8 10% povidone-iodine for insertion site cleaning before central line insertion in  
12 9 preterm infants: a randomised trial. *Archives of disease in childhood Fetal and  
13 10 neonatal edition* 2018;103(2):F101-f06. doi: 10.1136/archdischild-2016-312193  
14 11 [published Online First: 2017/10/28]  
15 12 54. Stenke E, Kieran EA, McCarthy LK, et al. A randomised trial of placing preterm infants on  
16 13 their back or left side after birth. *Archives of disease in childhood Fetal and neonatal  
17 14 edition* 2016;101(5):F397-400. doi: 10.1136/archdischild-2015-309842 [published  
18 15 Online First: 2016/02/06]  
19 16 55. Murphy MC, Heiring C, Doglioni N, et al. Effect of Needle Aspiration of Pneumothorax on  
20 17 Subsequent Chest Drain Insertion in Newborns: A Randomized Clinical Trial. *JAMA  
21 18 pediatrics* 2018;172(7):664-69. doi: 10.1001/jamapediatrics.2018.0623 [published  
22 19 Online First: 2018/05/26]  
23 20  
24  
25  
26  
27  
28  
29 21  
30  
31 22  
32  
33  
34  
35  
36  
37  
38  
39  
40  
41  
42  
43  
44  
45  
46  
47  
48  
49  
50  
51  
52  
53  
54  
55  
56  
57  
58  
59  
60

| <b><u>Procedures</u></b>     | <b><u>Screening</u></b> | <b><u>Allocation</u></b> | <b><u>Post-allocation</u></b> | <b><u>Close-out</u></b> |
|------------------------------|-------------------------|--------------------------|-------------------------------|-------------------------|
|                              | Screening               | Day of Birth             | 120 hours after birth         | Discharge home          |
| <b>ENROLMENT</b>             |                         |                          |                               |                         |
| Inclusion/Exclusion Criteria | X                       |                          |                               |                         |
| Informed consent             | X                       |                          |                               |                         |
| Allocation                   |                         | x                        |                               |                         |
| <b>INTERVENTIONS</b>         |                         |                          |                               |                         |
| Oropharyngeal surfactant     |                         | x                        |                               |                         |
| Standard care - CPAP         |                         | x                        |                               |                         |
| <b>ASSESSMENTS</b>           |                         |                          |                               |                         |
| Baseline variables           |                         | x                        |                               |                         |
| Primary outcome              |                         |                          | x                             |                         |
| Other outcomes               |                         |                          | x                             | x                       |

Schedule of events

150x82mm (300 x 300 DPI)

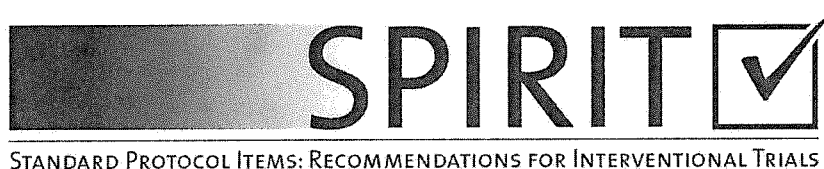

SPIRIT 2013 Checklist: Recommended items to address in a clinical trial protocol and related documents\*

| Section/item                                                          | Item No | Description                                                                                                                                                                                                                                                                              |
|-----------------------------------------------------------------------|---------|------------------------------------------------------------------------------------------------------------------------------------------------------------------------------------------------------------------------------------------------------------------------------------------|
| <b>Administrative information</b>                                     |         |                                                                                                                                                                                                                                                                                          |
| Title <i>Page 1</i>                                                   | 1       | Descriptive title identifying the study design, population, interventions, and, if applicable, trial acronym                                                                                                                                                                             |
| Trial registration <i>P1, line 12</i>                                 | 2a      | Trial identifier and registry name. If not yet registered, name of intended registry                                                                                                                                                                                                     |
|                                                                       | 2b      | All items from the World Health Organization Trial Registration Data Set                                                                                                                                                                                                                 |
| Protocol version <i>P1 line 15</i>                                    | 3       | Date and version identifier                                                                                                                                                                                                                                                              |
| Funding <i>Pg 2 line 7</i>                                            | 4       | Sources and types of financial, material, and other support                                                                                                                                                                                                                              |
| Roles and responsibilities <i>Page 1 Line 17</i><br><i>Page 2 + 3</i> | 5a      | Names, affiliations, and roles of protocol contributors                                                                                                                                                                                                                                  |
|                                                                       | 5b      | Name and contact information for the trial sponsor                                                                                                                                                                                                                                       |
|                                                                       | 5c      | Role of study sponsor and funders, if any, in study design; collection, management, analysis, and interpretation of data; writing of the report; and the decision to submit the report for publication, including whether they will have ultimate authority over any of these activities |
|                                                                       | 5d      | Composition, roles, and responsibilities of the coordinating centre, steering committee, endpoint adjudication committee, data management team, and other individuals or groups overseeing the trial, if applicable (see Item 21a for data monitoring committee)                         |
|                                                                       |         |                                                                                                                                                                                                                                                                                          |
| <b>Introduction</b>                                                   |         |                                                                                                                                                                                                                                                                                          |
| Background and rationale <i>Page 7</i>                                | 6a      | Description of research question and justification for undertaking the trial, including summary of relevant studies (published and unpublished) examining benefits and harms for each intervention                                                                                       |
|                                                                       | 6b      | Explanation for choice of comparators                                                                                                                                                                                                                                                    |
| Objectives <i>Page 9 line 22</i>                                      | 7       | Specific objectives or hypotheses                                                                                                                                                                                                                                                        |
| Trial design <i>Page 10 line 6</i>                                    | 8       | Description of trial design including type of trial (eg, parallel group, crossover, factorial, single group), allocation ratio, and framework (eg, superiority, equivalence, noninferiority, exploratory)                                                                                |

**Methods: Participants, interventions, and outcomes**

1  
2  
3  
4 Study setting 9 Description of study settings (eg, community clinic, academic hospital)  
5 *Page 10 line 12* and list of countries where data will be collected. Reference to where  
6 list of study sites can be obtained  
7

8  
9 Eligibility criteria 10 Inclusion and exclusion criteria for participants. If applicable, eligibility  
10 *Page 10 line 23* criteria for study centres and individuals who will perform the  
11 interventions (eg, surgeons, psychotherapists)  
12

13 Interventions 11a Interventions for each group with sufficient detail to allow replication,  
14 *Page 15* including how and when they will be administered  
15 *Line 1*

16 11b Criteria for discontinuing or modifying allocated interventions for a  
17 given trial participant (eg, drug dose change in response to harms,  
18 participant request, or improving/worsening disease)  
19

20 11c Strategies to improve adherence to intervention protocols, and any  
21 procedures for monitoring adherence (eg, drug tablet return,  
22 laboratory tests)  
23  
24

25 11d Relevant concomitant care and interventions that are permitted or  
26 prohibited during the trial  
27

28 Outcomes 12 Primary, secondary, and other outcomes, including the specific  
29 *Page 11 line 24* measurement variable (eg, systolic blood pressure), analysis metric  
30 (eg, change from baseline, final value, time to event), method of  
31 aggregation (eg, median, proportion), and time point for each  
32 outcome. Explanation of the clinical relevance of chosen efficacy and  
33 harm outcomes is strongly recommended  
34  
35

36 Participant 13 Time schedule of enrolment, interventions (including any run-ins and  
37 *Page 10 line 10* washouts), assessments, and visits for participants. A schematic  
38 *(Page 22 line 15)* diagram is highly recommended (see Figure)  
39  
40

41 Sample size 14 Estimated number of participants needed to achieve study objectives  
42 *Page 10* and how it was determined, including clinical and statistical  
43 *Line 7* assumptions supporting any sample size calculations  
44

45 Recruitment 15 Strategies for achieving adequate participant enrolment to reach  
46 target sample size  
47 *Page 12 line 15*  
48

**Methods: Assignment of interventions (for controlled trials)**

49 Allocation:  
50

51  
52 Sequence 16a Method of generating the allocation sequence (eg, computer-  
53 generation generated random numbers), and list of any factors for stratification.  
54 To reduce predictability of a random sequence, details of any planned  
55 *Page 15 line 4* restriction (eg, blocking) should be provided in a separate document  
56 that is unavailable to those who enrol participants or assign  
57 interventions  
58  
59  
60

- 1  
2 Allocation 16b Mechanism of implementing the allocation sequence (eg, central  
3 concealment telephone; sequentially numbered, opaque, sealed envelopes),  
4 mechanism describing any steps to conceal the sequence until interventions are  
5 assigned  
6 *Page 15 Line 15*
- 7 Implementation 16c Who will generate the allocation sequence, who will enrol participants,  
8 and who will assign participants to interventions  
9 *Page 15 Line 14*
- 10  
11 Blinding 17a Who will be blinded after assignment to interventions (eg, trial  
12 (masking) participants, care providers, outcome assessors, data analysts), and  
13 how  
14 *Page 15*  
15 *Line 19*
- 16 17b If blinded, circumstances under which unblinding is permissible, and  
17 procedure for revealing a participant's allocated intervention during  
18 the trial  
19

### 20 **Methods: Data collection, management, and analysis**

- 21  
22 Data collection 18a Plans for assessment and collection of outcome, baseline, and other  
23 methods trial data, including any related processes to promote data quality (eg,  
24 *P17 Line 16* duplicate measurements, training of assessors) and a description of  
25 study instruments (eg, questionnaires, laboratory tests) along with  
26 their reliability and validity, if known. Reference to where data  
27 collection forms can be found, if not in the protocol
- 28  
29  
30 *P19 Line 25* 18b Plans to promote participant retention and complete follow-up,  
31 including list of any outcome data to be collected for participants who  
32 discontinue or deviate from intervention protocols
- 33  
34 Data 19 Plans for data entry, coding, security, and storage, including any  
35 management related processes to promote data quality (eg, double data entry;  
36 *Page 17 Line 22* range checks for data values). Reference to where details of data  
37 management procedures can be found, if not in the protocol
- 38  
39  
40 Statistical 20a Statistical methods for analysing primary and secondary outcomes.  
41 methods Reference to where other details of the statistical analysis plan can be  
42 *P18 Line 2* found, if not in the protocol
- 43  
44 20b Methods for any additional analyses (eg, subgroup and adjusted  
45 analyses)
- 46  
47 20c Definition of analysis population relating to protocol non-adherence  
48 (eg, as randomised analysis), and any statistical methods to handle  
49 missing data (eg, multiple imputation)  
50  
51

### 52 **Methods: Monitoring**

- 53  
54 Data monitoring 21a Composition of data monitoring committee (DMC); summary of its role  
55 and reporting structure; statement of whether it is independent from  
56 *Page 21* the sponsor and competing interests; and reference to where further  
57 *Line 6* details about its charter can be found, if not in the protocol.  
58 Alternatively, an explanation of why a DMC is not needed  
59  
60

|    |                                 |                           |                                                                                                                                                                                                                                                                                     |
|----|---------------------------------|---------------------------|-------------------------------------------------------------------------------------------------------------------------------------------------------------------------------------------------------------------------------------------------------------------------------------|
| 1  |                                 |                           |                                                                                                                                                                                                                                                                                     |
| 2  |                                 | 21b                       | Description of any interim analyses and stopping guidelines, including who will have access to these interim results and make the final decision to terminate the trial                                                                                                             |
| 3  |                                 |                           |                                                                                                                                                                                                                                                                                     |
| 4  |                                 |                           |                                                                                                                                                                                                                                                                                     |
| 5  |                                 |                           |                                                                                                                                                                                                                                                                                     |
| 6  |                                 |                           |                                                                                                                                                                                                                                                                                     |
| 7  | Harms                           | 22                        | Plans for collecting, assessing, reporting, and managing solicited and spontaneously reported adverse events and other unintended effects of trial interventions or trial conduct                                                                                                   |
| 8  | <i>Page 20</i>                  |                           |                                                                                                                                                                                                                                                                                     |
| 9  | <i>Line 23</i>                  |                           |                                                                                                                                                                                                                                                                                     |
| 10 |                                 |                           |                                                                                                                                                                                                                                                                                     |
| 11 | Auditing                        | 23                        | Frequency and procedures for auditing trial conduct, if any, and whether the process will be independent from investigators and the sponsor                                                                                                                                         |
| 12 | <i>Page 17</i>                  |                           |                                                                                                                                                                                                                                                                                     |
| 13 | <i>Line 18</i>                  |                           |                                                                                                                                                                                                                                                                                     |
| 14 |                                 |                           |                                                                                                                                                                                                                                                                                     |
| 15 |                                 |                           |                                                                                                                                                                                                                                                                                     |
| 16 | <b>Ethics and dissemination</b> |                           |                                                                                                                                                                                                                                                                                     |
| 17 |                                 |                           |                                                                                                                                                                                                                                                                                     |
| 18 | Research ethics approval        | 24                        | Plans for seeking research ethics committee/institutional review board (REC/IRB) approval                                                                                                                                                                                           |
| 19 | <i>Page 22 line 2</i>           | <i>and Page 2 line 10</i> |                                                                                                                                                                                                                                                                                     |
| 20 | Protocol amendments             | 25                        | Plans for communicating important protocol modifications (eg, changes to eligibility criteria, outcomes, analyses) to relevant parties (eg, investigators, REC/IRBs, trial participants, trial registries, journals, regulators)                                                    |
| 21 | <i>Page 22</i>                  |                           |                                                                                                                                                                                                                                                                                     |
| 22 | <i>Line 6</i>                   |                           |                                                                                                                                                                                                                                                                                     |
| 23 |                                 |                           |                                                                                                                                                                                                                                                                                     |
| 24 |                                 |                           |                                                                                                                                                                                                                                                                                     |
| 25 |                                 |                           |                                                                                                                                                                                                                                                                                     |
| 26 | Consent or assent               | 26a                       | Who will obtain informed consent or assent from potential trial participants or authorised surrogates, and how (see Item 32)                                                                                                                                                        |
| 27 | <i>Page 11</i>                  |                           |                                                                                                                                                                                                                                                                                     |
| 28 | <i>Line 10</i>                  |                           |                                                                                                                                                                                                                                                                                     |
| 29 |                                 |                           |                                                                                                                                                                                                                                                                                     |
| 30 |                                 | 26b                       | Additional consent provisions for collection and use of participant data and biological specimens in ancillary studies, if applicable                                                                                                                                               |
| 31 |                                 |                           |                                                                                                                                                                                                                                                                                     |
| 32 |                                 |                           |                                                                                                                                                                                                                                                                                     |
| 33 | Confidentiality                 | 27                        | How personal information about potential and enrolled participants will be collected, shared, and maintained in order to protect confidentiality before, during, and after the trial                                                                                                |
| 34 | <i>Page 17</i>                  |                           |                                                                                                                                                                                                                                                                                     |
| 35 | <i>Line 24</i>                  |                           |                                                                                                                                                                                                                                                                                     |
| 36 |                                 |                           |                                                                                                                                                                                                                                                                                     |
| 37 | Declaration of interests        | 28                        | Financial and other competing interests for principal investigators for the overall trial and each study site                                                                                                                                                                       |
| 38 | <i>Page 2 line 7</i>            |                           |                                                                                                                                                                                                                                                                                     |
| 39 | Access to data                  | 29                        | Statement of who will have access to the final trial dataset, and disclosure of contractual agreements that limit such access for investigators                                                                                                                                     |
| 40 | <i>Page 3 line 16</i>           |                           |                                                                                                                                                                                                                                                                                     |
| 41 |                                 |                           |                                                                                                                                                                                                                                                                                     |
| 42 |                                 |                           |                                                                                                                                                                                                                                                                                     |
| 43 |                                 |                           |                                                                                                                                                                                                                                                                                     |
| 44 |                                 |                           |                                                                                                                                                                                                                                                                                     |
| 45 | Ancillary and post-trial care   | 30                        | Provisions, if any, for ancillary and post-trial care, and for compensation to those who suffer harm from trial participation                                                                                                                                                       |
| 46 | <i>with</i>                     |                           |                                                                                                                                                                                                                                                                                     |
| 47 |                                 |                           |                                                                                                                                                                                                                                                                                     |
| 48 | Dissemination policy            | 31a                       | Plans for investigators and sponsor to communicate trial results to participants, healthcare professionals, the public, and other relevant groups (eg, via publication, reporting in results databases, or other data sharing arrangements), including any publication restrictions |
| 49 | <i>Page 21 line 2</i>           |                           |                                                                                                                                                                                                                                                                                     |
| 50 | <i>Page 18 line 6</i>           |                           |                                                                                                                                                                                                                                                                                     |
| 51 |                                 |                           |                                                                                                                                                                                                                                                                                     |
| 52 |                                 |                           |                                                                                                                                                                                                                                                                                     |
| 53 |                                 |                           |                                                                                                                                                                                                                                                                                     |
| 54 |                                 | 31b                       | Authorship eligibility guidelines and any intended use of professional writers                                                                                                                                                                                                      |
| 55 |                                 |                           |                                                                                                                                                                                                                                                                                     |
| 56 |                                 |                           |                                                                                                                                                                                                                                                                                     |
| 57 |                                 | 31c                       | Plans, if any, for granting public access to the full protocol, participant-level dataset, and statistical code                                                                                                                                                                     |
| 58 |                                 |                           |                                                                                                                                                                                                                                                                                     |
| 59 |                                 |                           |                                                                                                                                                                                                                                                                                     |
| 60 |                                 |                           |                                                                                                                                                                                                                                                                                     |

## Appendices

|                            |    |                                                                                                                                                                                                |
|----------------------------|----|------------------------------------------------------------------------------------------------------------------------------------------------------------------------------------------------|
| Informed consent materials | 32 | Model consent form and other related documentation given to participants and authorised surrogates                                                                                             |
| Biological specimens       | 33 | Plans for collection, laboratory evaluation, and storage of biological specimens for genetic or molecular analysis in the current trial and for future use in ancillary studies, if applicable |

---

\*It is strongly recommended that this checklist be read in conjunction with the SPIRIT 2013 Explanation & Elaboration for important clarification on the items. Amendments to the protocol should be tracked and dated. The SPIRIT checklist is copyrighted by the SPIRIT Group under the Creative Commons "[Attribution-NonCommercial-NoDerivs 3.0 Unported](https://creativecommons.org/licenses/by-nc-nd/3.0/)" license.
